# Supplementary material
Source: PubMed Central journal article supplement (PMC5920654)

## *Supporting Information*

*For*

### **Visible-Light-Promoted C–S Cross-Coupling via Intermolecular Charge-Transfer**

Bin Liu,<sup>†,‡</sup> Chern-Hooi Lim,<sup>†,‡</sup> Garret M. Miyake<sup>\*,†,‡,⊥</sup>

<sup>†</sup>Department of Chemistry, Colorado State University, Fort Collins, Colorado 80523, United States. <sup>‡</sup>Department of Chemistry and Biochemistry, <sup>⊥</sup>Materials Science and Engineering Program, University of Colorado Boulder, Boulder, Colorado 80309, United States

\*Corresponding author, E-mail: garret.miyake@colostate.edu

## Table of Contents

|                                                                           |     |
|---------------------------------------------------------------------------|-----|
| General Information.....                                                  | S3  |
| General Experimental Procedure .....                                      | S4  |
| Optimization and Control Experiments .....                                | S5  |
| Failed Substrates and S <sub>n</sub> Ar Substrates .....                  | S7  |
| Mechanistic Considerations .....                                          | S8  |
| a. UV-vis Absorption Spectra .....                                        | S8  |
| b. Time-Dependent Density Functional Theory Calculations .....            | S11 |
| NMR Shifts upon Base Addition to Thiols and Aryl Halides .....            | S13 |
| 4-Methylbenzenethiol Sodium Salt as Cross-Coupling Partner.....           | S14 |
| Chemistry on the Roof: Sunlight-Driven Reaction .....                     | S15 |
| Multi-Gram Scale Experiment .....                                         | S16 |
| Late-Stage Modifications of Drug Molecules.....                           | S17 |
| Synthesis of Key Structures of 11 $\beta$ -HSD1 Inhibitors .....          | S18 |
| Characterizations.....                                                    | S19 |
| References.....                                                           | S58 |
| <sup>1</sup> H NMR and <sup>13</sup> C NMR Spectra of New Compounds ..... | S60 |

## General Information

DMSO was purchased from Sigma-Aldrich and sparged with nitrogen for 15 min at room temperature and stored under nitrogen atmosphere. 4'-Bromoacetophenone and *p*-Toluenethiol were purchased from TCI America. Cs<sub>2</sub>CO<sub>3</sub> (*ReagentPlus*®, 99%) was purchased from Sigma-Aldrich and the suppliers for the other sources of base are specified in Table S2. Aryl halides and thiols were purchased from Sigma-Aldrich, TCI or Alfa Aesar. Organic solutions were concentrated under reduced pressure on a Büchi rotary evaporator using a water bath. One, sixteen inch strip of double-density white LEDs, purchased from Creative Lighting Solutions (item no. CL-FRS1210-5M-12V-WH), was wrapped inside a 400 mL beaker and used as a visible light source. The emission spectrum of the white LEDs was measured with an Ocean Optics ADC1000 spectrometer.<sup>1</sup>

The <sup>1</sup>H and <sup>13</sup>C NMR spectra were recorded at 300 MHz, 400 MHz or 500 MHz for <sup>1</sup>H or at 75MHz, 100 MHz or 125 MHz for <sup>13</sup>C NMR, respectively. Deuterated solvents were purchased from Cambridge Isotope Laboratories (Andover, MA) and used as received. All <sup>1</sup>H NMR experiments are reported in  $\delta$  units, parts per million (ppm), and were measured relative to the signals for residual chloroform (7.26 ppm) in the deuterated solvents. Data for <sup>1</sup>H NMR are reported as follows: chemical shift ( $\delta$  ppm), multiplicity (s = singlet, d = doublet, t = triplet, q = quartet, p = quintet, m = multiplet, dd = doublet of doublets, dt = doublet of triplets...etc, br = broad), coupling constant (Hz) and integration. All <sup>13</sup>C NMR spectra are reported in ppm relative to CDCl<sub>3</sub> (77.0 ppm). Trimethoxybenzene was used as an internal standard for NMR yields from proton analysis for the C-S bond formation reaction.

Flash column chromatography was performed by using a 100-150 times weight excess of flash silica gel 40-63  $\mu$ m from Aldrich. Fractions were analyzed by TLC using TLC silica gel F254 250  $\mu$ m pre-coated-plates from Merck and permanganate stain was used for UV-inactive compounds.

ESI mass spectrometry analysis was performed at the University of Colorado Boulder mass spectrometry facility using a Synapt G2 HDMS instrument, or Agilent 6220 TOF LC/MS with Agilent 1200 HPLC with multi-mode (combined ESI and APCI) at Colorado State University.

## General Experimental Procedure

A 25 mL storage flask was charged with a stir bar, flame dried under vacuum and back filled with nitrogen three times. The flask was then charged with  $\text{Cs}_2\text{CO}_3$  (97.7 mg, 0.3 mmol, 1.5 eq.), 4'-Bromoacetophenone (39.8 mg, 0.2 mmol, 1.00 eq.), *p*-Toluenethiol (37.3 mg, 0.3 mmol, 1.5 eq.) and 1.5 mL DMSO. The reaction mixture was evacuated and purged with inert gas ( $\text{N}_2$ ) three times. The reaction mixture was then placed into an LED-lined beaker and stirred with a compressed air gas tube for cooling. After the time specified in the reaction schemes, the reaction mixture was washed with water and extracted with EtOAc. Purification of the crude product by flash chromatography on silica gel using the indicated solvent system afforded the desired product.

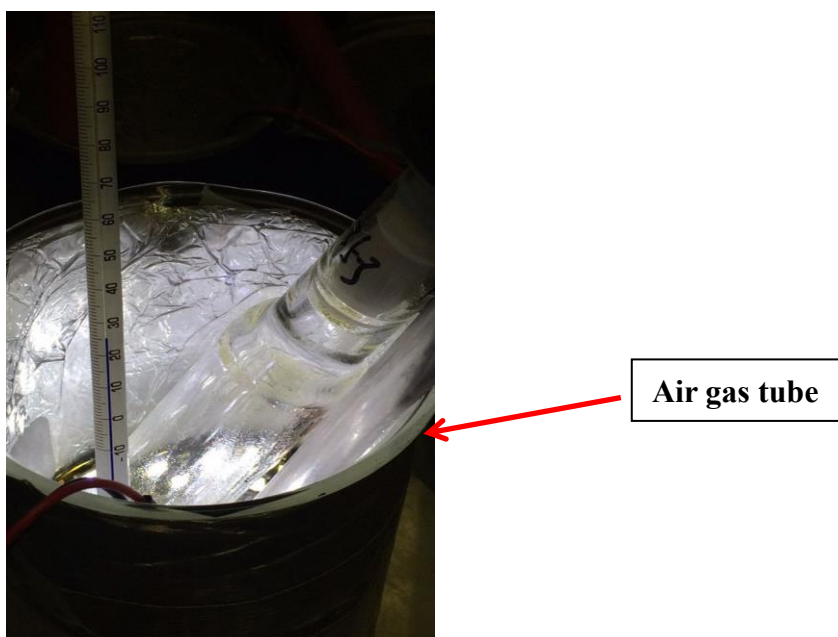

**Figure S1.** Photograph of the reaction setup for C-S bond formation reaction using visible light LED beakers.

## Optimization and Control Experiments

**Table S1. Visible-Light Promoted C-S couplings, Effect of Reaction Parameters<sup>a</sup>**

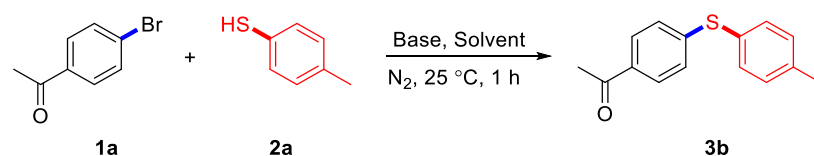

| Entry | Base (eq)                             | Light            | Solvent            | Y (%) <sup>b</sup> |
|-------|---------------------------------------|------------------|--------------------|--------------------|
| 1     | Cs <sub>2</sub> CO <sub>3</sub> (1.5) | Yes              | DMSO               | 97 <sup>c</sup>    |
| 2     | Cs <sub>2</sub> CO <sub>3</sub> (1.5) | No               | DMSO               | Trace              |
| 3     | Cs <sub>2</sub> CO <sub>3</sub> (1.0) | Yes              | DMSO               | 87                 |
| 4     | Cs <sub>2</sub> CO <sub>3</sub> (0.5) | Yes              | DMSO               | 12                 |
| 5     | Cs <sub>2</sub> CO <sub>3</sub> (0.0) | Yes              | DMSO               | 0                  |
| 6     | Cs <sub>2</sub> CO <sub>3</sub> (1.5) | Yes <sup>d</sup> | DMSO               | 0                  |
| 7     | K <sub>2</sub> CO <sub>3</sub> (1.5)  | Yes              | DMSO               | 91                 |
| 8     | Na <sub>2</sub> CO <sub>3</sub> (1.5) | Yes              | DMSO               | 24                 |
| 9     | Cs <sub>2</sub> CO <sub>3</sub> (1.5) | Yes              | DMF                | 35                 |
| 10    | Cs <sub>2</sub> CO <sub>3</sub> (1.5) | Yes              | CH <sub>3</sub> CN | 0                  |
| 11    | Cs <sub>2</sub> CO <sub>3</sub> (1.5) | Yes              | DMA                | 76                 |

<sup>a</sup>The beaker with white light emitting diodes (LEDs) was cooled to room temperature with compressed air. <sup>b</sup>NMR yield using trimethoxybenzene as internal standard. <sup>c</sup>Isolated yield. <sup>d</sup>Reaction performed in the presence of air.

**Table S2. Visible-Light Promoted C-S couplings, Effect of Base Purity**

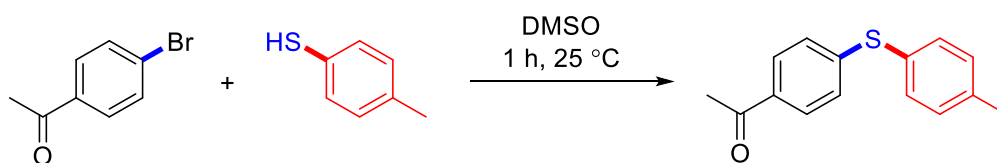

| Entry | Base (1.5 eq)                                | Light | Atmosphere     | Product (%) |
|-------|----------------------------------------------|-------|----------------|-------------|
| 1     | Cs <sub>2</sub> CO <sub>3</sub>              | No    | N <sub>2</sub> | trace       |
| 2     | Cs <sub>2</sub> CO <sub>3</sub>              | Yes   | Air            | 0           |
| 3     | No                                           | Yes   | N <sub>2</sub> | 0           |
| 4     | Cs <sub>2</sub> CO <sub>3</sub> <sup>a</sup> | Yes   | N <sub>2</sub> | 95          |
| 5     | K <sub>2</sub> CO <sub>3</sub> <sup>b</sup>  | Yes   | N <sub>2</sub> | 92          |
| 6     | Cs <sub>2</sub> CO <sub>3</sub> <sup>c</sup> | Yes   | N <sub>2</sub> | 92          |
| 7     | K <sub>2</sub> CO <sub>3</sub> <sup>d</sup>  | Yes   | N <sub>2</sub> | 96          |

<sup>a</sup>Sigma Aldrich 99.995% trace metals basis. <sup>b</sup>Sigma Aldrich 99.995% trace metals basis. <sup>c</sup>Alfa Aesar 99.994% trace metals basis. <sup>d</sup>Alfa Aesar 99.997% trace metals basis.

**Control experiment with base of different grade purchased from different vendors.**

Four reactions were performed in parallel (DMSO, 25 °C, *p*-Toluenethiol, 1.5 eq Base, 0.2 mmol scale): a) Cs<sub>2</sub>CO<sub>3</sub> (Aldrich, 99.995% trace metal basis), b) K<sub>2</sub>CO<sub>3</sub> (Aldrich, 99.995%), c) Cs<sub>2</sub>CO<sub>3</sub> (Alfa-Aesar, 99.994%), and d) K<sub>2</sub>CO<sub>3</sub> (Alfa-Aesar, 99.997%). The reactions were monitored by NMR and no appreciable differences in conversion and selectivity in these four reactions were observed.

**Control experiments with substrates which could proceed through a S<sub>N</sub>Ar reaction.**

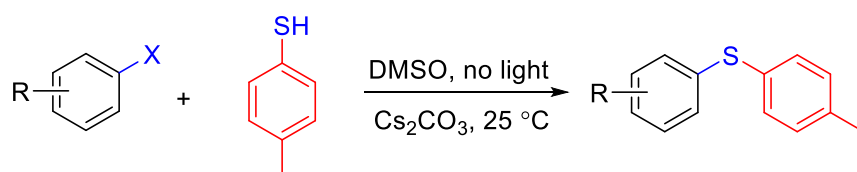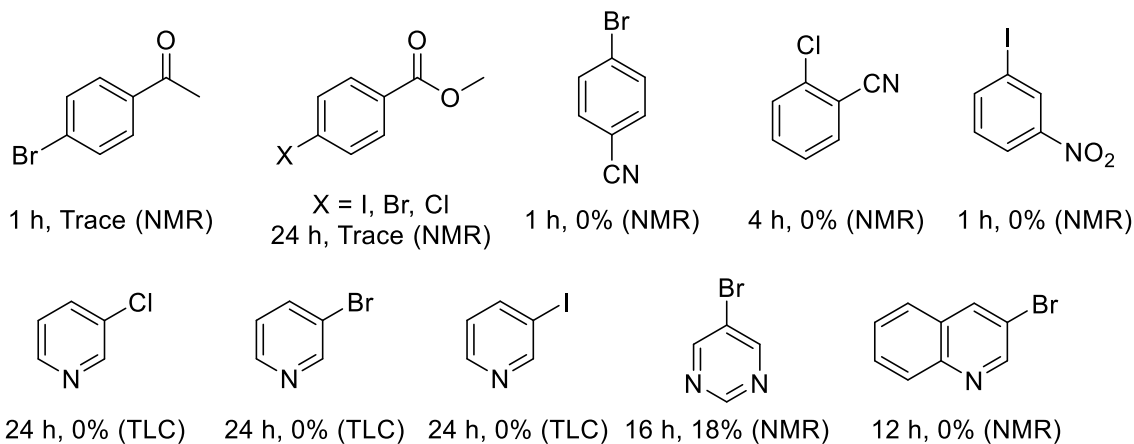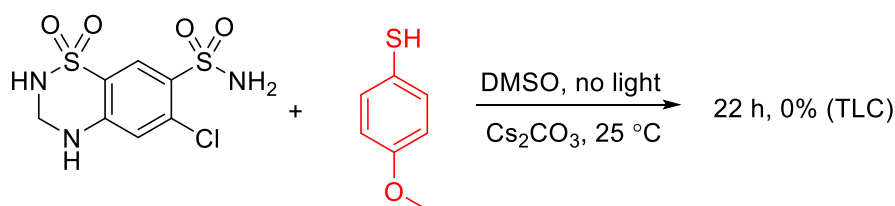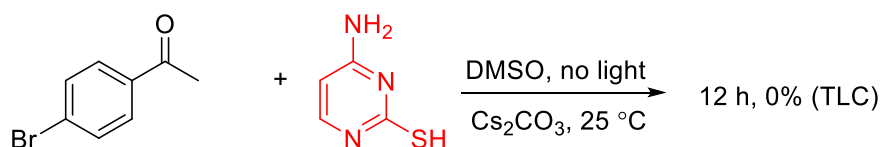

Determined using TLC: Thin Layer Chromatography or NMR: Nuclear Magnetic Resonance

## Failed Substrates and S<sub>n</sub>Ar Substrates

The substrates (**1-13**) did not yield products under standard reaction conditions. The substrates (**14-18**) yielded products even without light, which presumably reacted via S<sub>n</sub>Ar (nucleophilic aromatic substitution) mechanism.

### Failed Substrates

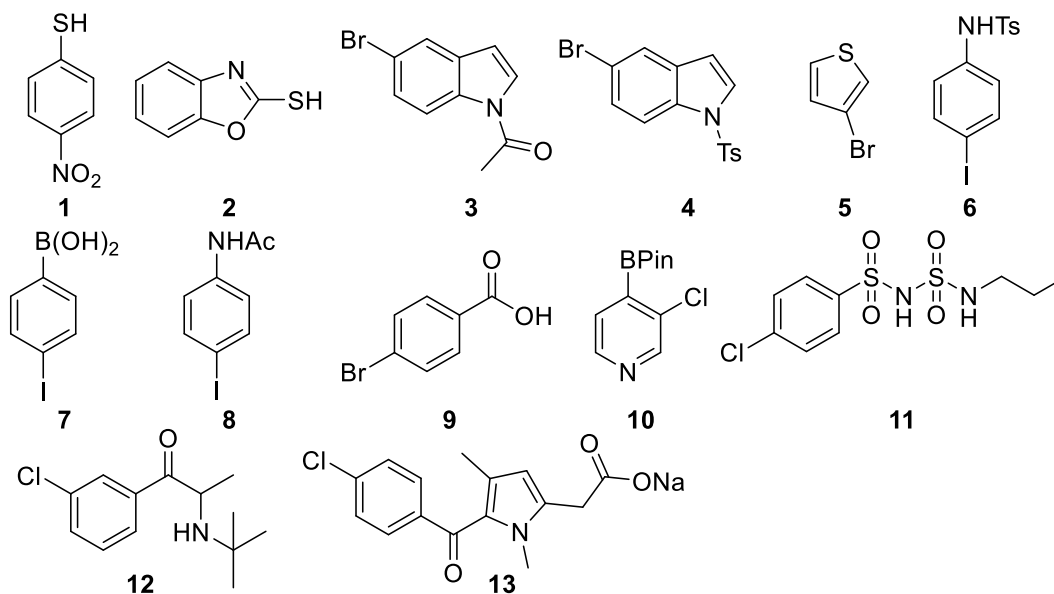

### S<sub>n</sub>Ar Substrates

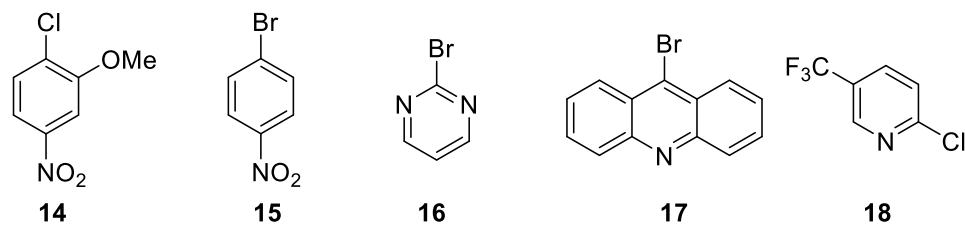

## Mechanistic Considerations

### a. UV-vis Absorption Spectra

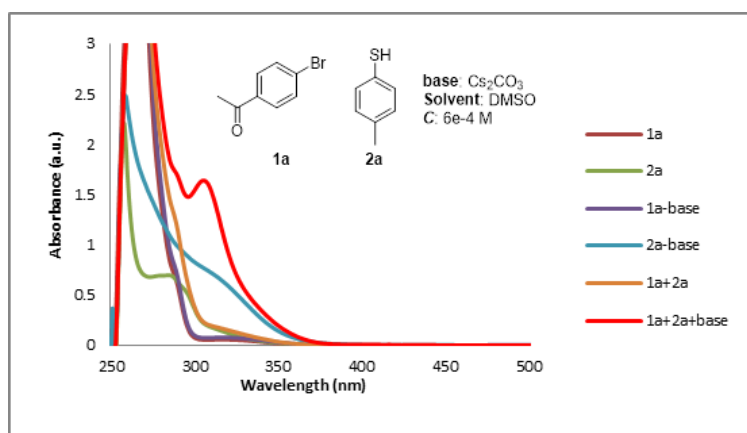

**Figure S2.** Control experiment with UV-visible absorption spectra ( $c = 6e-4$  M)

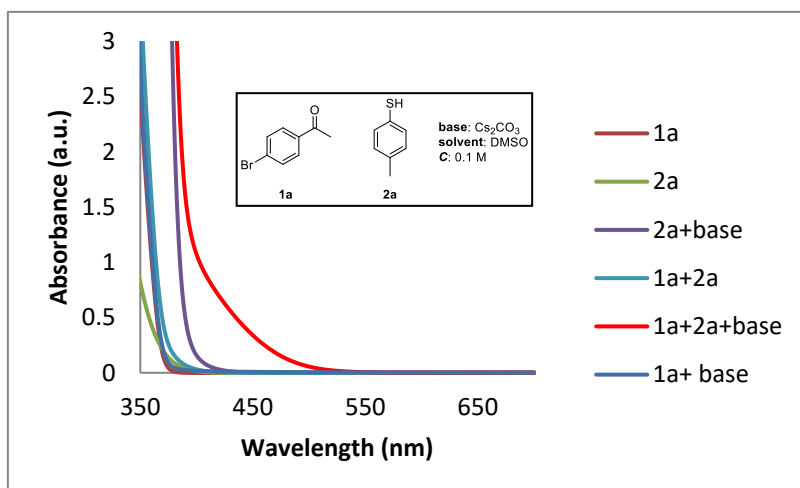

**Figure S3.** Control experiment with UV-visible absorption spectra ( $c = 0.1$  M)

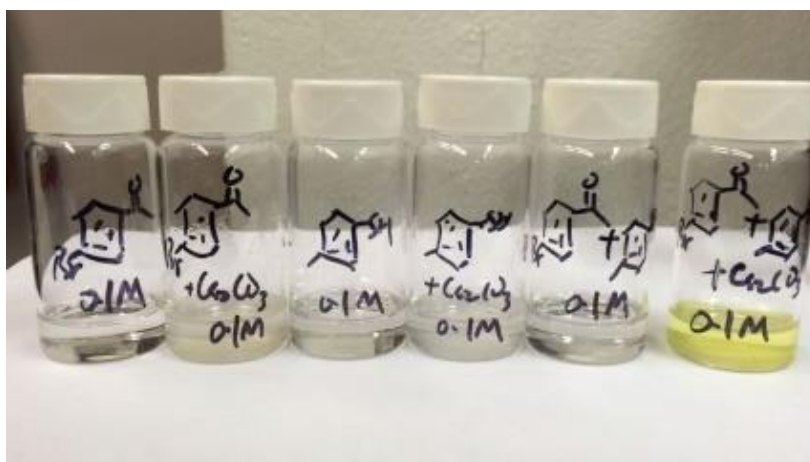

**Figure S4.** Photograph showing the control experiments with various mixtures of **1a**, **2a**, and Cs<sub>2</sub>CO<sub>3</sub> ( $c = 0.1$  M). The solution is visibly yellow in color when **1a**, **2a**, and Cs<sub>2</sub>CO<sub>3</sub> were mixed together in DMSO.



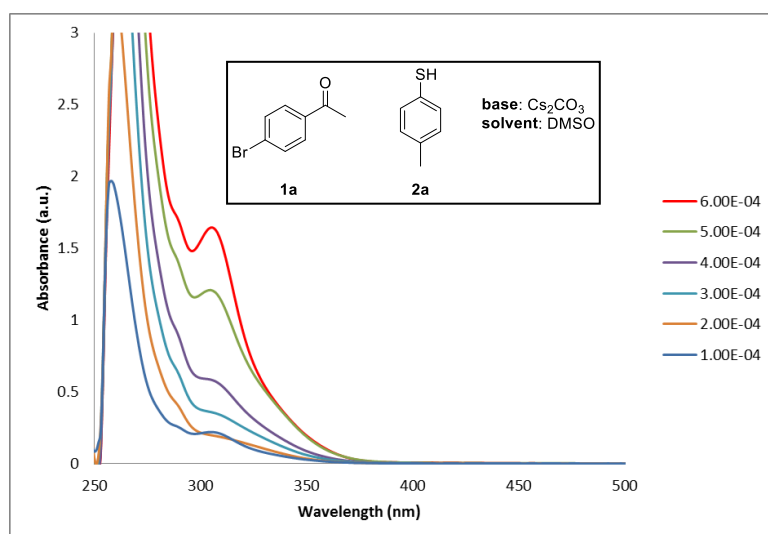

**Figure S5.** UV-vis absorption spectra at different concentrations ( $\sim 10^{-4}$  M).

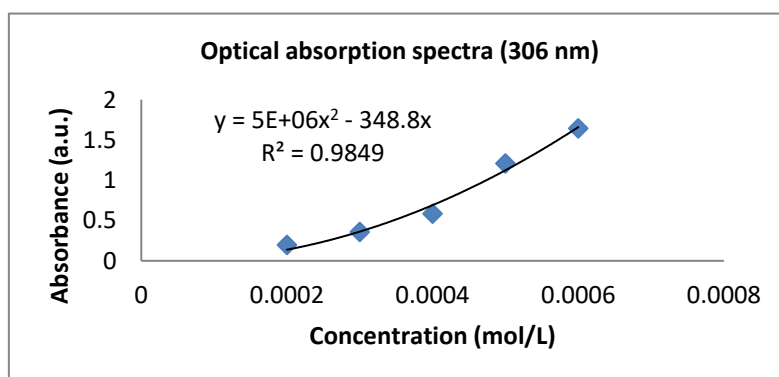

**Figure S6.** Plot of absorbance as a function of concentrations ( $\sim 10^{-4}$  M). Path length = 1 cm.

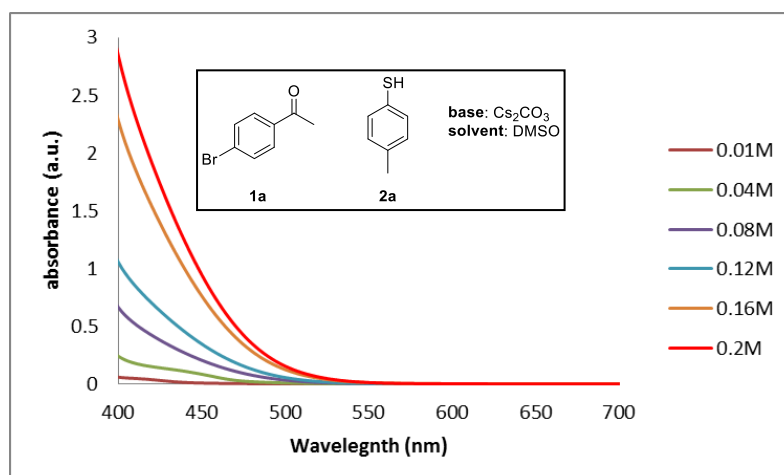

**Figure S7.** UV-vis absorption spectra at different concentrations ( $\sim 10^{-1}$  M).

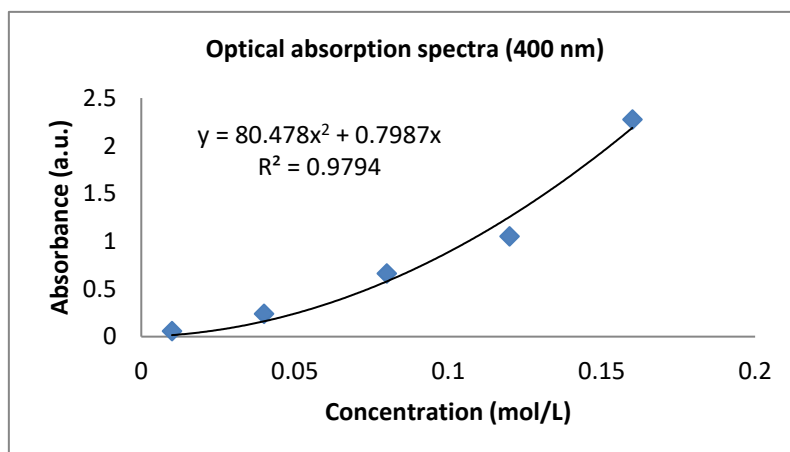

**Figure S8.** Plot of absorbance as a function of concentrations ( $\sim 10^{-1}$  M). Path length = 1 cm.

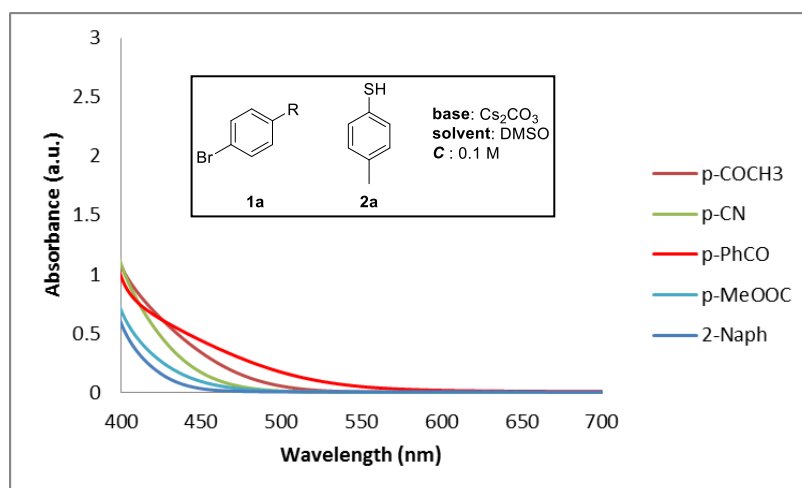

**Figure S9.** UV-vis absorption spectra with different functional groups substituted at the aryl bromides

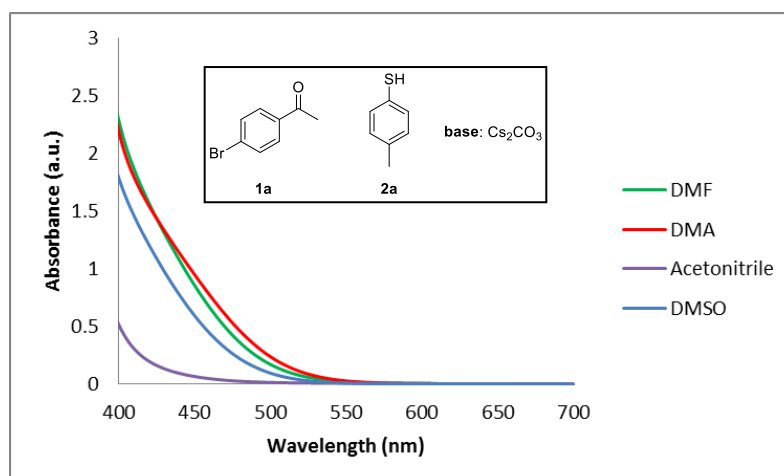

**Figure S10.** UV-vis absorption spectra with different Solvents ( $c = 0.15M$ ).

## b. Time-Dependent Density Functional Theory Calculations

All calculations were performed using computational chemistry software package Gaussian 09 ver. D01. We acknowledge the use of computational resources provided by XSEDE - Comet supercomputer.

Ground state geometry of the thiolate-aryl halide EDA complex was optimized at the rM06/6-31+G(d,p)/CPCM-DMSO level of theory. Using this geometry, single point time-dependent density functional theory (TD-DFT) calculation was then performed using the rCAM-B3LYP/6-31+G(d,p)/CPCM-DMSO level of theory. The first 10 excited states of the EDA complex (composed of species **1a** and the deprotonated **2a**) are reported below. Dominant UV-vis absorption peaks with significant and relevant oscillator strengths (f value) highlighted in red.

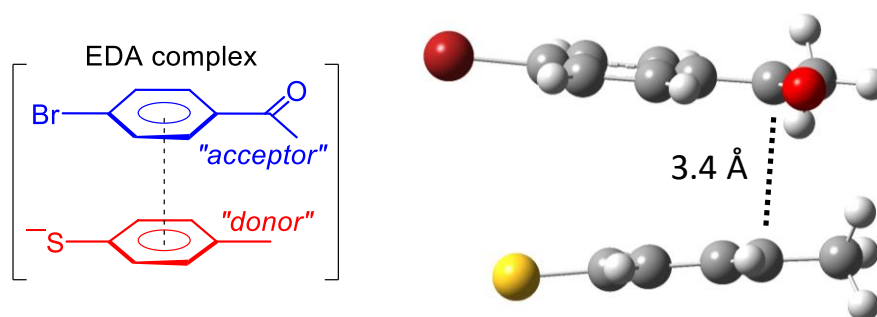

Excited State 1: Singlet-?Sym 3.2359 eV 383.15 nm f=0.0364 <S\*\*2>=0.000  
82 -> 83 0.70082 ( $\pi_{\text{HOMO}}-\pi_{\text{LUMO}}$ ,  $2*(0.70082)^2*100 = 98\%$  contribution)

Excited state symmetry could not be determined.

Excited State 2: Singlet-?Sym 4.0543 eV 305.81 nm f=0.0001 <S\*\*2>=0.000  
81 -> 83 0.68847

Excited state symmetry could not be determined.

Excited State 3: Singlet-?Sym 4.0754 eV 304.23 nm f=0.0001 <S\*\*2>=0.000  
76 -> 83 0.65280  
76 -> 91 0.11507

Excited state symmetry could not be determined.

Excited State 4: Singlet-?Sym 4.2165 eV 294.04 nm f=0.0216 <S\*\*2>=0.000  
82 -> 84 0.52518  
82 -> 87 0.14545  
82 -> 89 0.41827

Excited state symmetry could not be determined.

Excited State 5: Singlet-?Sym 4.3896 eV 282.45 nm f=0.1373 <S\*\*2>=0.000  
82 -> 85 0.20104  
82 -> 86 0.20812  
82 -> 87 0.41952 ( $\pi_{\text{HOMO}}-\pi_{\text{LUMO}+4}$ ,  $2*(0.41952)^2*100 = 35\%$  contribution)  
82 -> 88 0.39804 ( $\pi_{\text{HOMO}}-\pi_{\text{LUMO}+5}$ ,  $2*(0.39804)^2*100 = 32\%$  contribution)

82 -> 89        -0.12413  
82 -> 92        0.13025

Excited state symmetry could not be determined.

Excited State 6:        Singlet-?Sym        4.5069 eV    275.10 nm    f=0.0162    <S\*\*2>=0.000  
82 -> 84                0.46663  
82 -> 87                -0.17226  
82 -> 89                -0.46169

Excited state symmetry could not be determined.

Excited State 7:        Singlet-?Sym        4.5838 eV    270.49 nm    f=0.1135    <S\*\*2>=0.000  
82 -> 85                0.37118  
82 -> 86                0.24615  
82 -> 87                -0.26832  
82 -> 89                0.10525  
82 -> 90                0.11234  
82 -> 91                0.24975  
82 -> 92                -0.15793  
82 -> 93                -0.21253  
82 -> 95                0.10313

Excited state symmetry could not be determined.

Excited State 8:        Singlet-?Sym        4.7694 eV    259.96 nm    f=0.0407    <S\*\*2>=0.000  
77 -> 83                -0.29954  
79 -> 84                -0.18071  
80 -> 83                0.54640  
82 -> 86                -0.12367

Excited state symmetry could not be determined.

Excited State 9:        Singlet-?Sym        4.7730 eV    259.76 nm    f=0.0094    <S\*\*2>=0.000  
80 -> 83                -0.16233  
82 -> 85                0.38498  
82 -> 86                -0.33730  
82 -> 87                0.11451  
82 -> 92                -0.27487  
82 -> 93                0.11525  
82 -> 97                -0.19303

Excited state symmetry could not be determined.

Excited State 10:       Singlet-?Sym        4.8448 eV    255.91 nm    f=0.0646    <S\*\*2>=0.000  
81 -> 84                0.16037  
81 -> 85                0.10830  
81 -> 86                0.21540  
81 -> 87                0.40282  
81 -> 88                0.37849  
81 -> 90                0.13087  
81 -> 92                0.20198

## NMR Shifts upon Base Addition to Thiols and Aryl Halides

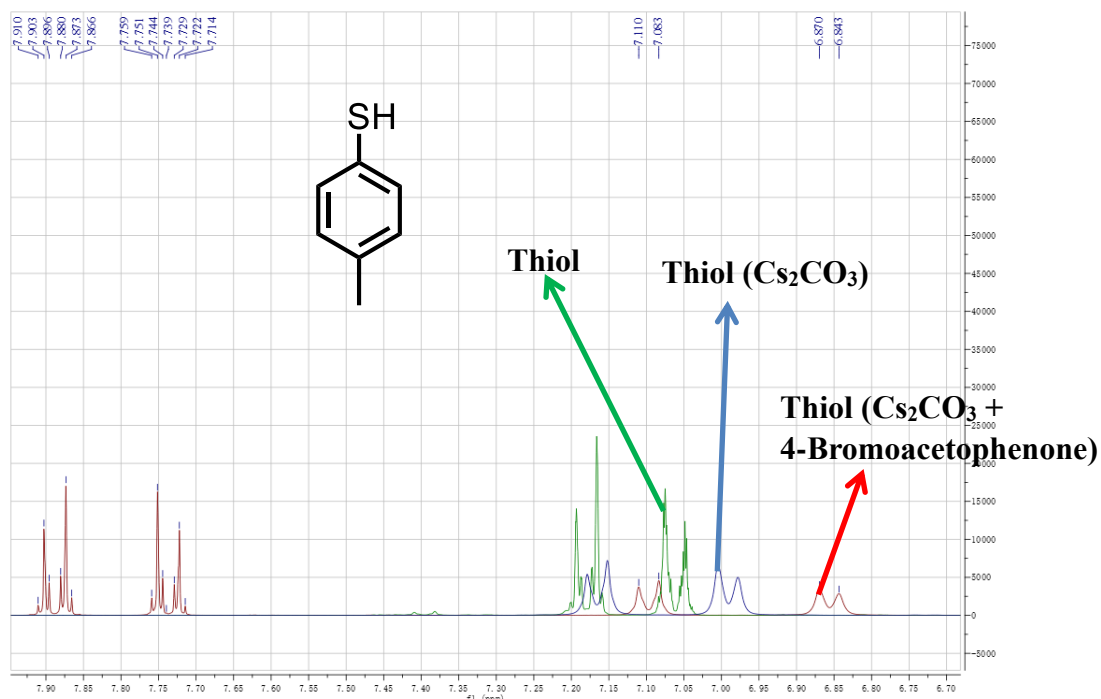

**Figure S11. NMR shift of thiol.** Thiol: thiol+ $d_6$ -DMSO. Thiol ( $\text{Cs}_2\text{CO}_3$ ): thiol+ $\text{Cs}_2\text{CO}_3$ + $d_6$ -DMSO. Thiol ( $\text{Cs}_2\text{CO}_3$ +4-Bromoacetophenone): thiol+ $\text{Cs}_2\text{CO}_3$ +4-Bromoacetophenone + $d_6$ -DMSO.

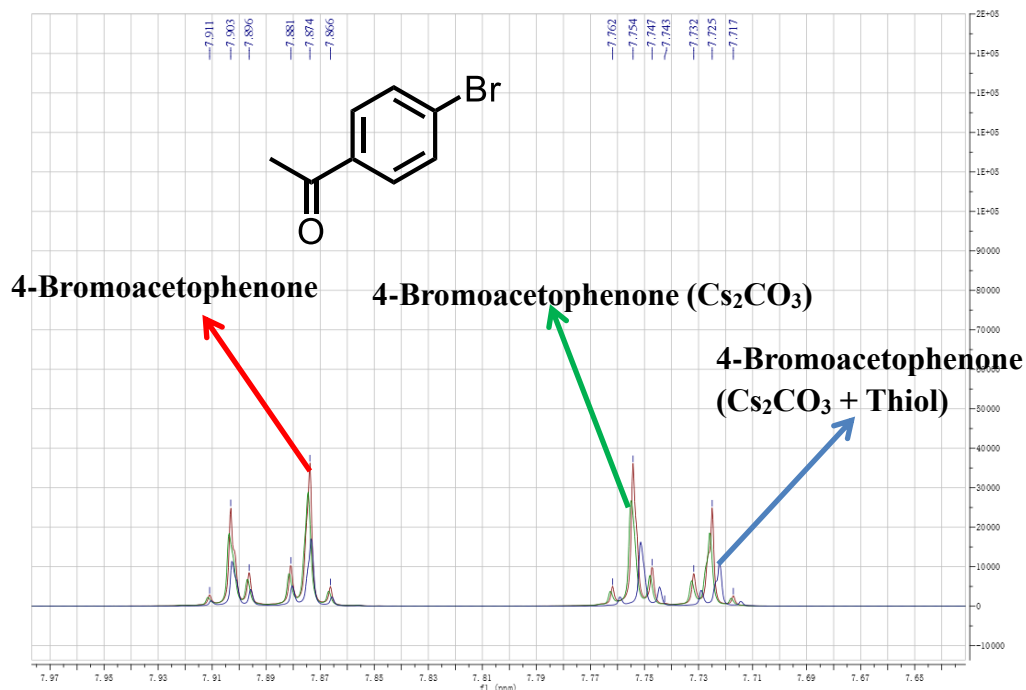

**Figure S12. NMR shift of 4-Bromoacetophenone.** 4-Bromoacetophenone: 4-Bromoacetophenone+ $d_6$ -DMSO. 4-Bromoacetophenone ( $\text{Cs}_2\text{CO}_3$ ): 4-Bromoacetophenone+ $\text{Cs}_2\text{CO}_3$ + $d_6$ -DMSO. 4-Bromoacetophenone ( $\text{Cs}_2\text{CO}_3$ +thiol): thiol+ $\text{Cs}_2\text{CO}_3$ +4-Bromoacetophenone + $d_6$ -DMSO.

## 4-Methylbenzenethiol Sodium Salt as Cross-Coupling Partner

To investigate if the varying metal carbonate bases affecting reactivity is due to the deprotonation step or due to a secondary effect in the charge transfer event, we subjected 4-methylbenzenethiol sodium salt to our C-S bond formation conditions without external base. The reactions proceeded smoothly and yielded the desired compound in high yield. This result revealed that varying metal carbonate bases affecting reactivity is due to the deprotonation step.

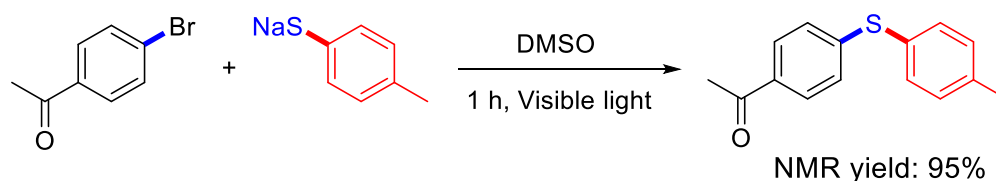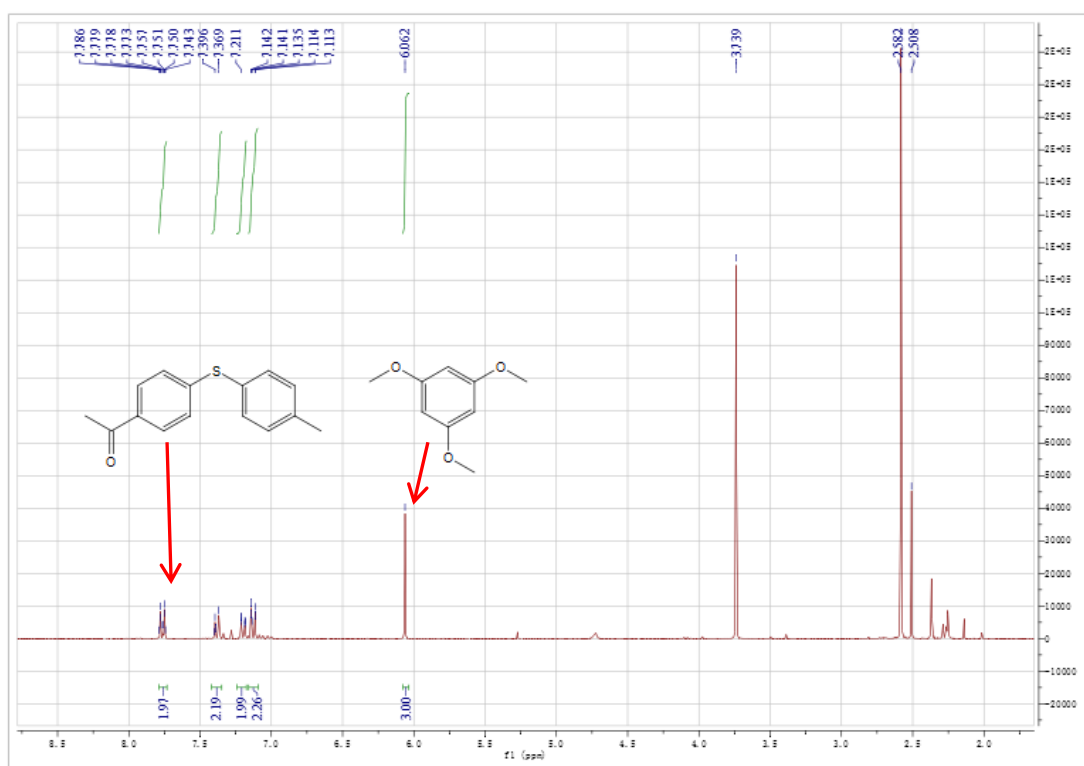

## Chemistry on the Roof: Sunlight-Driven Reaction

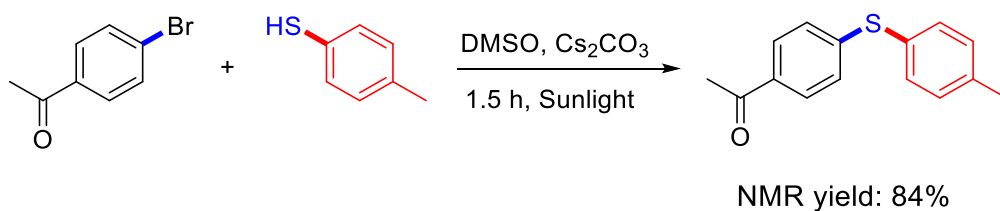

The reaction was set up in the laboratory according to the general procedure, using the  $\text{Cs}_2\text{CO}_3$  (97.7 mg, 0.3 mmol, 1.5 eq.), 4'-Bromoacetophenone (39.8 mg, 0.2 mmol, 1.00 eq.), p-toluenethiol (37.3 mg, 0.3 mmol, 1.5 eq.) and 1.5 mL DMSO. The reaction mixture was evacuated and purged with inert gas ( $\text{N}_2$ ) three times. Then, the storage flask was exposed to natural sunlight irradiation beside the window of room 363 in the Department of Chemistry and Biochemistry at the University of Colorado, Boulder from 2:20 PM to 3:50 PM on April 10th, 2017, on a partially cloudy day. The  $^1\text{H}$  NMR yield is 84% by using trimethoxybenzene as internal standard.

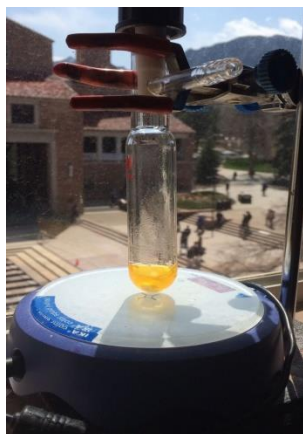

**Figure S13.** Picture of set-up for the sunlight-driven reaction

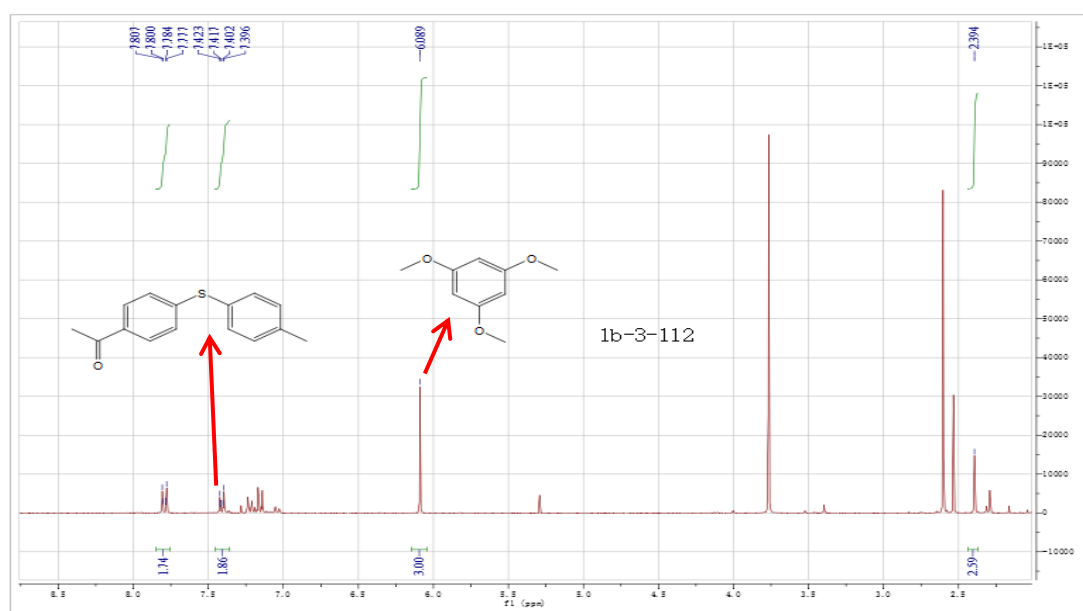

## Multi-Gram Scale Experiment

A 100 mL storage flask was charged with a stir bar, flame dried under vacuum and back filled with nitrogen three times. The flask was then charged with  $\text{Cs}_2\text{CO}_3$  (19.54 g, 60 mmol, 1.2 eq.), 4'-Bromoacetophenone (9.95 g, 50 mmol, 1.00 eq.), *p*-Toluenethiol (7.45 g, 60 mmol, 1.2 eq.) and 60 mL DMSO. The reaction mixture was evacuated and purged with inert gas ( $\text{N}_2$ ) three times. The reaction mixture was then placed into an LED-lined beaker and stirred with an air gas tube for cooling. After 14 hours, the reaction mixture was washed with water and extracted with EtOAc three times. Purification of the crude product by flash chromatography on silica gel using the indicated solvent system afforded the desired product (9.710 g, 80%).

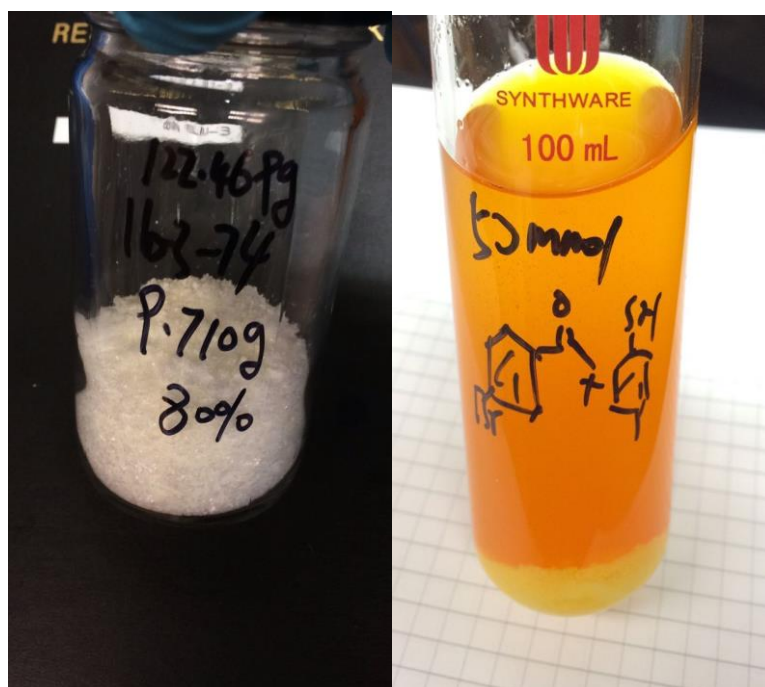

**Figure S14.** Photographs of multi-gram scale experiment. Left: Isolated C-S coupled product; Right: Reaction mixture after irradiation.



## Late-Stage Modifications of Drug Molecules

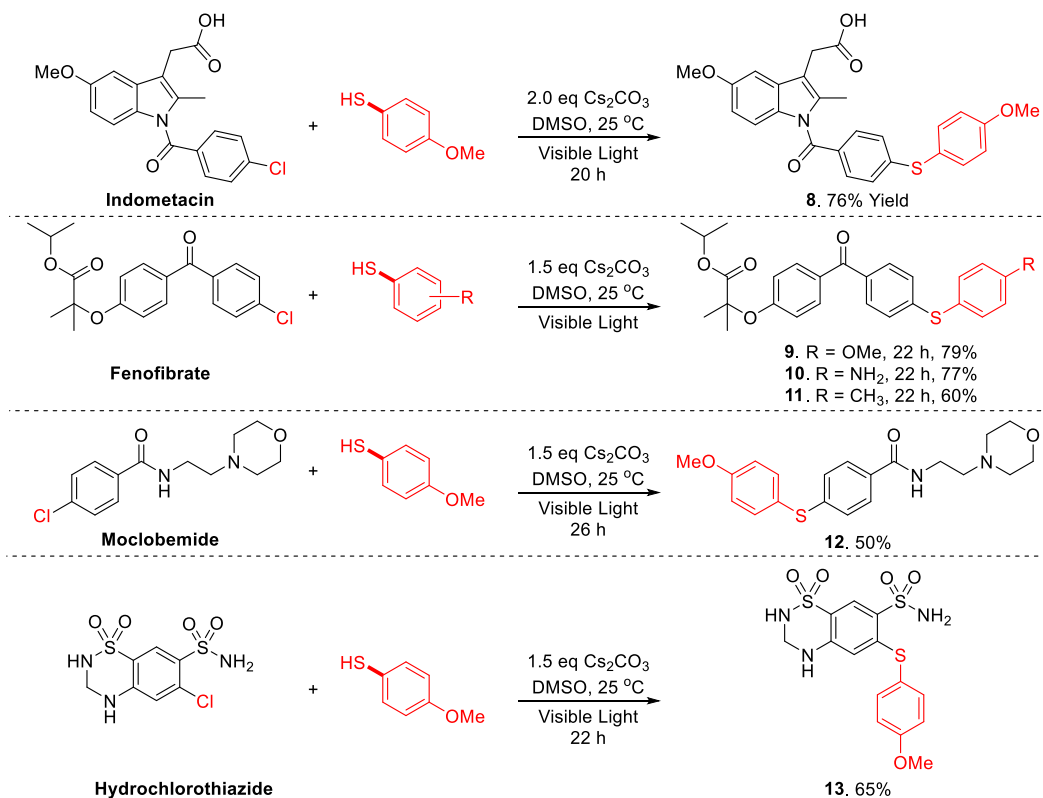

## Synthesis of Key Structures of 11 $\beta$ -HSD1 Inhibitors

To evaluate our method for making bioactivities molecules, we subjected 2-chlorobenzenethiol and 2-bromobenzenethiol to our C-S bond formation conditions. The reactions proceeded smoothly and yielded the C-S bond containing target compounds in high yield.

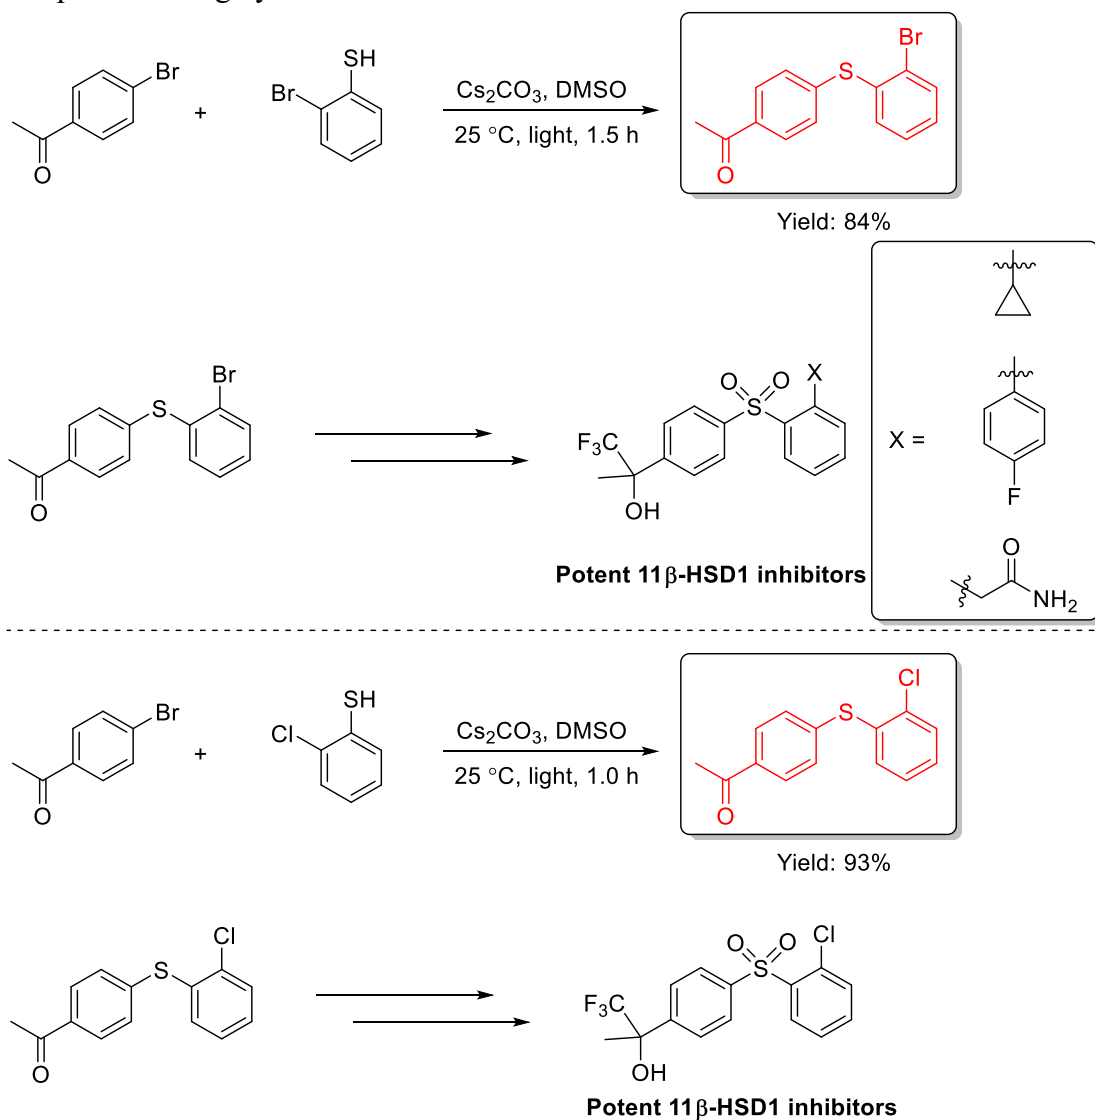

## Characterizations

### General Procedure

A 25 mL storage flask was charged with a stir bar, flame dried under vacuum and back filled with nitrogen three times. The flask was then charged with Cs<sub>2</sub>CO<sub>3</sub> (97.7 mg, 0.3 mmol, 1.5 eq.), aryl halides (0.2 mmol, 1.00 eq.), thiols (0.3 mmol, 1.5 eq.) and 1.5 mL DMSO. The reaction mixture was evacuated and purged with inert gas (N<sub>2</sub>) three times. The reaction mixture was then placed into an LED-lined beaker and stirred with an air gas tube for cooling. After the time specified in the reaction schemes, the reaction mixture was washed with water, extracted with EtOAc and concentrated in vacuum. Purification of the crude product by flash chromatography on silica gel using the indicated solvent system afforded the desired product.

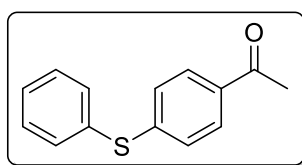

### 1-(4-(Phenylthio)phenyl)ethan-1-one (3a)<sup>2</sup>

A 25 mL storage flask was charged with a stir bar, flame dried under vacuum and back filled with nitrogen three times. The flask was then charged with Cs<sub>2</sub>CO<sub>3</sub> (97.7 mg, 0.3 mmol, 1.5 eq.), 4'-Bromoacetophenone (39.8 mg, 0.2 mmol, 1.00 eq.), benzenethiol (33.0 mg, 0.3 mmol, 1.5 eq.) and 1.5 mL DMSO. The reaction mixture was evacuated and purged with inert gas (N<sub>2</sub>) three times. The reaction mixture was then placed into an LED-lined beaker and stirred with an air gas tube for cooling. After stirred for 4 hours, the reaction mixture was washed with water, extracted with EtOAc and concentrated in vacuum. The product was isolated by flash chromatography (1:6 EtOAc:hexanes) as white solid (X = Br, 43mg, 92%).

**Physical State:** white solid;

**R<sub>f</sub>** = 0.5 (silica gel, 1:6 EtOAc:hexanes);

**<sup>1</sup>H NMR (300 MHz, CDCl<sub>3</sub>)** δ 7.84 (dt, *J* = 8.7, 2.1 Hz, 2H), 7.54 – 7.49 (m, 2H), 7.44 – 7.41 (m, 3H), 7.23 (dt, *J* = 8.7, 2.1 Hz, 2H), 2.57 (s, 3H)

**<sup>13</sup>C NMR (75 MHz, CDCl<sub>3</sub>)** δ 197.1, 144.9, 134.5, 133.8, 132.1, 129.7, 128.9, 128.8, 127.5, 26.44

**HRMS (ESI-TOF):** *m/z* calcd. for C<sub>14</sub>H<sub>12</sub>OS ([M+H]<sup>+</sup>) 229.0687, found 229.0685.

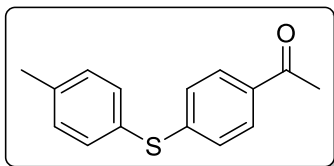

### 1-(4-(*p*-Tolylthio)phenyl)ethan-1-one (3b)<sup>3</sup>

A 25 mL storage flask was charged with a stir bar, flame dried under vacuum and back filled with nitrogen three times. The flask was then charged with Cs<sub>2</sub>CO<sub>3</sub> (97.7 mg, 0.3 mmol, 1.5 eq.), 4'-Bromoacetophenone (39.8 mg, 0.2 mmol, 1.00 eq.), *p*-Toluenethiol (37.3 mg, 0.3 mmol, 1.5 eq.) and 1.5 mL DMSO. The reaction mixture was evacuated and purged with inert gas (N<sub>2</sub>) three times. The reaction mixture was then placed into an LED-lined beaker and stirred with an air gas tube for cooling. After stirred for 1 hour, the reaction mixture was washed with water, extracted with EtOAc and concentrated in vacuum. The product was isolated by flash chromatography (1:6 EtOAc:hexanes) as white solid (X = Cl, 95%; X = Br, 47 mg, 97%; X = I, 89%).

**Physical State:** white solid;

*R<sub>f</sub>* = 0.5 (silica gel, 1:6 EtOAc:hexanes);

<sup>1</sup>H NMR (300 MHz, CDCl<sub>3</sub>) δ 7.82 – 7.78 (m, 2H), 7.41 (dt, *J* = 8.1 2.1 Hz, 2H), 7.24 – 7.21 (m, 2H), 7.18 – 7.14 (m, 2H), 2.54 (s, 3H), 2.40 (s, 3H)

<sup>13</sup>C NMR (75 MHz, CDCl<sub>3</sub>) δ 197.0, 145.9, 139.3, 134.4, 134.1, 130.5, 128.8, 127.9, 126.6, 26.4, 21.2

**HRMS (ESI-TOF):** *m/z* calcd. for C<sub>15</sub>H<sub>14</sub>OS ([M+H]<sup>+</sup>) 243.0844, found 243.0848.

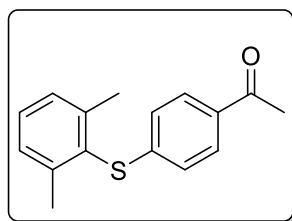

### 1-(4-((2,6-Dimethylphenyl)thio)phenyl)ethan-1-one (3c)<sup>4</sup>

A 25 mL storage flask was charged with a stir bar, flame dried under vacuum and back filled with nitrogen three times. The flask was then charged with Cs<sub>2</sub>CO<sub>3</sub> (97.7 mg, 0.3 mmol, 1.5 eq.), 4'-Bromoacetophenone (39.8 mg, 0.2 mmol, 1.00 eq.), 2,6-dimethylbenzenethiol (41.4 mg, 0.3 mmol, 1.5 eq.) and 1.5 mL DMSO. The reaction mixture was evacuated and purged with inert gas (N<sub>2</sub>) three times. The reaction mixture was then placed into an LED-lined beaker and stirred with an air gas tube for cooling. After stirred for 1 hour, the reaction mixture was washed with water,

extracted with EtOAc and concentrated in vacuum. The product was isolated by flash chromatography (1:6 EtOAc:hexanes) as white solid (X = Br, 44 mg, 85%).

**Physical State:** white solid;

$R_f$  = 0.5 (silica gel, 1:6 EtOAc:hexanes);

$^1\text{H NMR}$  (300 MHz,  $\text{CDCl}_3$ )  $\delta$  7.79 (dt,  $J$  = 8.7 Hz, 2.1 Hz, 2H), 7.31 – 7.22 (m, 3H), 6.97 (dt,  $J$  = 8.7 Hz, 2.1 Hz, 2H), 2.54 (s, 3H), 2.43 (s, 6H)

$^{13}\text{C NMR}$  (75 MHz,  $\text{CDCl}_3$ )  $\delta$  197.0, 145.3, 143.9, 133.6, 129.9, 128.9, 128.7, 124.8, 26.4, 21.7

**HRMS (ESI-TOF):**  $m/z$  calcd. for  $\text{C}_{16}\text{H}_{16}\text{OS}$  ( $[\text{M}+\text{H}]^+$ ) 257.1000, found 257.0998.

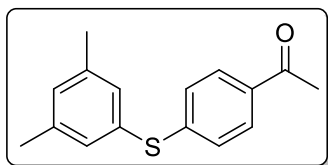

### 1-(4-((3,5-Dimethylphenyl)thio)phenyl)ethan-1-one (3d)

A 25 mL storage flask was charged with a stir bar, flame dried under vacuum and back filled with nitrogen three times. The flask was then charged with  $\text{Cs}_2\text{CO}_3$  (97.7 mg, 0.3 mmol, 1.5 eq.), 4'-Bromoacetophenone (39.8 mg, 0.2 mmol, 1.00 eq.), 3,5-dimethylbenzenethiol (41.4 mg, 0.3 mmol, 1.5 eq.) and 1.5 mL DMSO. The reaction mixture was evacuated and purged with inert gas ( $\text{N}_2$ ) three times. The reaction mixture was then placed into an LED-lined beaker and stirred with an air gas tube for cooling. After stirred for 1 hour, the reaction mixture was washed with water, extracted with EtOAc and concentrated in vacuum. The product was isolated by flash chromatography (1:6 EtOAc:hexanes) as white solid (X = Br, 36 mg, 70%).

**Physical State:** white solid;

$R_f$  = 0.5 (silica gel, 1:6 EtOAc:hexanes);

$^1\text{H NMR}$  (300 MHz,  $\text{CDCl}_3$ )  $\delta$  7.83 – 7.79 (m, 2H), 7.22 – 7.19 (m, 2H), 7.14 – 7.13 (m, 2H), 7.02 (dt,  $J$  = 3.0, 1.1 Hz, 1H), 2.55 (s, 3H), 2.32 (s, 3H), 2.31 (s, 3H)

$^{13}\text{C NMR}$  (75 MHz,  $\text{CDCl}_3$ )  $\delta$  197.1, 145.5, 139.4, 134.3, 131.6, 131.2, 130.7, 128.8, 127.2, 26.4, 21.2

**HRMS (ESI-TOF):**  $m/z$  calcd. for  $\text{C}_{16}\text{H}_{16}\text{OS}$  ( $[\text{M}+\text{H}]^+$ ) 257.1000, found 257.1000.

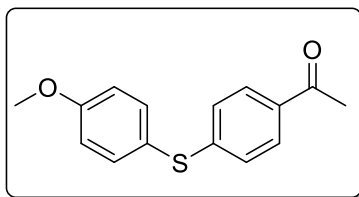

### 1-(4-((4-Methoxyphenyl)thio)phenyl)ethan-1-one (3e)<sup>5</sup>

A 25 mL storage flask was charged with a stir bar, flame dried under vacuum and back filled with nitrogen three times. The flask was then charged with Cs<sub>2</sub>CO<sub>3</sub> (97.7 mg, 0.3 mmol, 1.5 eq.), 4'-Bromoacetophenone (39.8 mg, 0.2 mmol, 1.00 eq.), 4-methoxybenzenethiol (42.0 mg, 0.3 mmol, 1.5 eq.) and 1.5 mL DMSO. The reaction mixture was evacuated and purged with inert gas (N<sub>2</sub>) three times. The reaction mixture was then placed into an LED-lined beaker and stirred with an air gas tube for cooling. After stirred for 1 hour, the reaction mixture was washed with water, extracted with EtOAc and concentrated in vacuum. The product was isolated by flash chromatography (1:6 EtOAc:hexanes) as white solid (X = Br, 44 mg, 85%).

**Physical State:** white solid;

$R_f$  = 0.4 (silica gel, 1:6 EtOAc:hexanes);

<sup>1</sup>H NMR (300 MHz, CDCl<sub>3</sub>) δ 7.80 (dt,  $J$  = 8.7 Hz, 2.1 Hz, 2H), 7.49 (dt,  $J$  = 8.7 Hz, 2.1 Hz, 2H), 7.11 (dt,  $J$  = 8.7 Hz, 2.1 Hz, 2H), 6.98 (dt,  $J$  = 8.7 Hz, 2.7 Hz, 2H), 3.87 (s, 3H), 2.55 (s, 3H)

<sup>13</sup>C NMR (75 MHz, CDCl<sub>3</sub>) δ 197.1, 160.7, 146.8, 136.8, 133.9, 128.8, 125.8, 121.4, 115.4, 55.4, 26.4

**HRMS (ESI-TOF):** m/z calcd. for C<sub>15</sub>H<sub>14</sub>O<sub>2</sub>S ([M+H]<sup>+</sup>) 259.0793, found 259.0794.

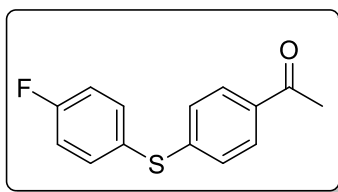

### 1-(4-((4-Fluorophenyl)thio)phenyl)ethan-1-one (3f)<sup>6</sup>

A 25 mL storage flask was charged with a stir bar, flame dried under vacuum and back filled with nitrogen three times. The flask was then charged with Cs<sub>2</sub>CO<sub>3</sub> (97.7 mg, 0.3 mmol, 1.5 eq.), 4'-Bromoacetophenone (39.8 mg, 0.2 mmol, 1.00 eq.), 4-fluorobenzenethiol (38.4 mg, 0.3 mmol, 1.5 eq.) and 1.5 mL DMSO. The reaction mixture was evacuated and purged with inert gas (N<sub>2</sub>) three times. The reaction mixture was then placed into an LED-lined beaker and stirred with an air gas tube for cooling. After stirred for 1 hour, the reaction mixture was washed with water,

extracted with EtOAc and concentrated in vacuum. The product was isolated by flash chromatography (1:6 EtOAc:hexanes) as white solid (X = Br, 38 mg, 77%).

**Physical State:** white solid;

$R_f$  = 0.5 (silica gel, 1:6 EtOAc:hexanes);

$^1\text{H NMR}$  (300 MHz,  $\text{CDCl}_3$ )  $\delta$  7.84 – 7.79 (m, 2H), 7.54 – 7.44 (m, 2H), 7.17 – 7.09 (m, 4H), 2.55 (s, 3H)

$^{13}\text{C NMR}$  (75 MHz,  $\text{CDCl}_3$ )  $\delta$  197.0, 163.3 (d,  $J$  = 248.5 Hz), 145.1, 136.5 (d,  $J$  = 8.4 Hz), 134.5, 128.9, 126.8, 117.0 (d,  $J$  = 21.9 Hz), 26.4

**HRMS (ESI-TOF):**  $m/z$  calcd. for  $\text{C}_{14}\text{H}_{11}\text{FOS}$  ( $[\text{M}+\text{H}]^+$ ) 247.0593, found 247.0594.

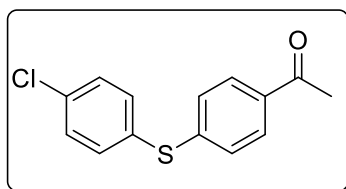

### 1-(4-((4-Chlorophenyl)thio)phenyl)ethan-1-one (3g)<sup>7</sup>

A 25 mL storage flask was charged with a stir bar, flame dried under vacuum and back filled with nitrogen three times. The flask was then charged with  $\text{Cs}_2\text{CO}_3$  (97.7 mg, 0.3 mmol, 1.5 eq.), 4'-Bromoacetophenone (39.8 mg, 0.2 mmol, 1.00 eq.), 4-chlorobenzenethiol (43.2 mg, 0.3 mmol, 1.5 eq.) and 1.5 mL DMSO. The reaction mixture was evacuated and purged with inert gas ( $\text{N}_2$ ) three times. The reaction mixture was then placed into an LED-lined beaker and stirred with an air gas tube for cooling. After stirred for 1 hour, the reaction mixture was washed with water, extracted with EtOAc and concentrated in vacuum. The product was isolated by flash chromatography (1:6 EtOAc:hexanes) as white solid (X = Br, 50 mg, 95%).

**Physical State:** white solid;

$R_f$  = 0.5 (silica gel, 1:6 EtOAc : hexanes);

$^1\text{H NMR}$  (300 MHz,  $\text{CDCl}_3$ )  $\delta$  7.85 – 7.81 (m, 2H), 7.43 – 7.35 (m, 4H), 7.23 – 7.20 (m, 2H), 2.56 (s, 3H)

$^{13}\text{C NMR}$  (75 MHz,  $\text{CDCl}_3$ )  $\delta$  197.0, 143.9, 134.9, 134.8, 130.94, 129.9, 129.0, 127.8, 26.5

**HRMS (ESI-TOF):**  $m/z$  calcd. for  $\text{C}_{14}\text{H}_{11}\text{ClOS}$  ( $[\text{M}+\text{H}]^+$ ) 263.0297, found 263.0294.

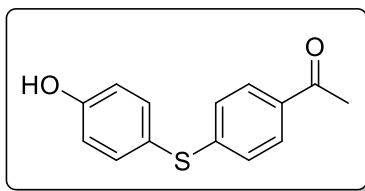

### 1-(4-((4-Hydroxyphenyl)thio)phenyl)ethan-1-one (3h)

A 25 mL storage flask was charged with a stir bar, flame dried under vacuum and back filled with nitrogen three times. The flask was then charged with  $\text{Cs}_2\text{CO}_3$  (130.3 mg, 0.4 mmol, 2.0 eq.), 4'-Bromoacetophenone (39.8 mg, 0.2 mmol, 1.00 eq.), 4-mercaptophenol (37.8 mg, 0.3 mmol, 1.5 eq.) and 1.5 mL DMSO. The reaction mixture was evacuated and purged with inert gas ( $\text{N}_2$ ) three times. The reaction mixture was then placed into an LED-lined beaker and stirred with an air gas tube for cooling. After stirred for 1 hour, the reaction mixture was washed with water, extracted with EtOAc and concentrated in vacuum. The product was isolated by flash chromatography (1:2 EtOAc:hexanes) as white solid (X = Br, 25mg, 50%).

**Physical State:** white solid;

$R_f$  = 0.1 (silica gel, 1:6 EtOAc:hexanes);

$^1\text{H NMR}$  (300 MHz,  $d_6$ -DMSO)  $\delta$  10.03 (s, 1H), 7.82 (dt,  $J$  = 8.7, 2.1 Hz, 2H), 7.39 (dt,  $J$  = 8.7, 2.6 Hz, 2H), 7.09 (dt,  $J$  = 8.7, 2.1 Hz, 2H), 6.90 (dt,  $J$  = 8.7, 2.7 Hz, 2H), 2.50 (s, 3H)

$^{13}\text{C NMR}$  (75 MHz,  $d_6$ -DMSO)  $\delta$  197.3, 159.5, 146.7, 137.4, 134.1, 129.4, 125.7, 118.4, 117.6, 26.9

**HRMS (ESI-TOF):**  $m/z$  calcd. for  $\text{C}_{14}\text{H}_{12}\text{O}_2\text{S}$  ( $[\text{M}-\text{H}]^-$ ) 243.0480, found 243.0478.

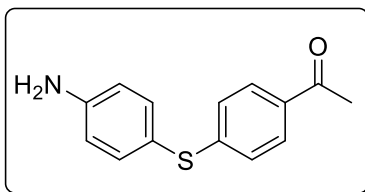

### 1-(4-((4-Aminophenyl)thio)phenyl)ethan-1-one (3i)

A 25 mL storage flask was charged with a stir bar, flame dried under vacuum and back filled with nitrogen three times. The flask was then charged with  $\text{Cs}_2\text{CO}_3$  (130.3 mg, 0.4 mmol, 2.0 eq.), 4'-Bromoacetophenone (39.8 mg, 0.2 mmol, 1.00 eq.), 4-aminobenzenethiol (37.5 mg, 0.3 mmol, 1.5 eq.) and 1.5 mL DMSO. The reaction mixture was evacuated and purged with inert gas ( $\text{N}_2$ ) three times. The reaction mixture was then placed into an LED-lined beaker and stirred with an air gas tube for cooling. After stirred for 14 hours, the reaction mixture was washed with water,



extracted with EtOAc and concentrated in vacuum. The product was isolated by flash chromatography (1:1 EtOAc:hexanes) as yellow solid (X = Br, 30 mg, 60%).

**Physical State:** yellow solid;

$R_f$  = 0.4 (silica gel, 1:1 EtOAc:hexanes)

**$^1\text{H}$  NMR (300 MHz,  $\text{CDCl}_3$ )**  $\delta$  7.77 (dt,  $J$  = 8.7, 2.1 Hz, 2H), 7.33 (dt,  $J$  = 8.7, 2.4 Hz, 2H), 7.08 (dt,  $J$  = 8.7, 2.1 Hz, 2H), 6.72 (dt,  $J$  = 8.7, 2.4 Hz, 2H), 3.91 (s, 2H), 2.53 (s, 3H)

**$^{13}\text{C}$  NMR (75 MHz,  $\text{CDCl}_3$ )**  $\delta$  197.2, 147.9, 147.8, 137.0, 133.6, 128.7, 125.3, 117.7, 116.0, 26.4

**HRMS (ESI-TOF):**  $m/z$  calcd. for  $\text{C}_{14}\text{H}_{13}\text{NOS}$  ( $[\text{M}+\text{H}]^+$ ) 244.0796, found 244.0805.

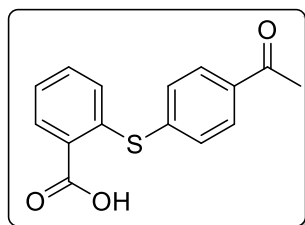

### 2-((4-Acetylphenyl)thio)benzoic acid (3j)

A 25 mL storage flask was charged with a stir bar, flame dried under vacuum and back filled with nitrogen three times. The flask was then charged with  $\text{Cs}_2\text{CO}_3$  (130.3 mg, 0.4 mmol, 2.0 eq.), 4'-Bromoacetophenone (39.8 mg, 0.2 mmol, 1.00 eq.), 2-mercaptobenzoic acid (46.2 mg, 0.3 mmol, 1.5 eq.) and 1.5 mL DMSO. The reaction mixture was evacuated and purged with inert gas ( $\text{N}_2$ ) three times. The reaction mixture was then placed into an LED-lined beaker and stirred with an air gas tube for cooling. After stirred for 1 hour, the reaction mixture was washed with water, extracted with EtOAc and concentrated in vacuum. The product was isolated by flash chromatography (8:1 DCM:MeOH) as white solid (X = Br, 35 mg, 64%).

**Physical State:** white solid;

$R_f$  = 0.3 (silica gel, 8:1 DCM:MeOH)

**$^1\text{H}$  NMR (300 MHz,  $d_6$ -DMSO)**  $\delta$  7.99 (dt,  $J$  = 8.7, 2.1 Hz, 2H), 7.92 (dd,  $J$  = 7.8, 1.2 Hz, 1H), 7.56 (dt,  $J$  = 8.4, 2.1 Hz, 2H, 2H), 7.46 – 7.40 (m, 1H), 7.32 (td,  $J$  = 7.5, 1.2 Hz, 1H), 6.98 (dd,  $J$  = 8.0, 0.9 Hz, 1H), 2.60 (s, 3H).

**$^{13}\text{C}$  NMR (75 MHz,  $d_6$ -DMSO)**  $\delta$  197.7, 167.9, 140.3, 138.6, 136.7, 133.4, 132.9, 131.2, 130.6, 129.9, 129.6, 126.5, 27.2

**HRMS (ESI-TOF):** m/z calcd. for C<sub>15</sub>H<sub>12</sub>O<sub>3</sub>S ([M-H]<sup>+</sup>) 271.0429, found 271.0433.

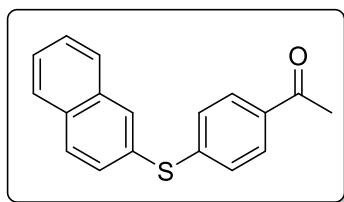

### 1-(4-(Naphthalen-2-ylthio)phenyl)ethan-1-one (3k)

A 25 mL storage flask was charged with a stir bar, flame dried under vacuum and back filled with nitrogen three times. The flask was then charged with Cs<sub>2</sub>CO<sub>3</sub> (97.7 mg, 0.3 mmol, 1.5 eq.), 4'-Bromoacetophenone (39.8 mg, 0.2 mmol, 1.00 eq.), naphthalene-2-thiol (48.0 mg, 0.3 mmol, 1.5 eq.) and 1.5 mL DMSO. The reaction mixture was evacuated and purged with inert gas (N<sub>2</sub>) three times. The reaction mixture was then placed into an LED-lined beaker and stirred with an air gas tube for cooling. After stirred for 1.5 hours, the reaction mixture was washed with water, extracted with EtOAc and concentrated in vacuum. The product was isolated by flash chromatography (1:6 EtOAc:hexanes) as white solid (X = Br, 40 mg, 71%).

**Physical State:** white solid;

*R<sub>f</sub>* = 0.5 (silica gel, 1:6 EtOAc:hexanes)

**<sup>1</sup>H NMR (300 MHz, CDCl<sub>3</sub>)** δ 8.04 (t, *J* = 1.2 Hz, 1H), 7.84 – 7.78 (m, 5H), 7.57 – 7.48 (m, 3H), 7.28 – 7.24 (m, 2H), 2.55 (s, 3H)

**<sup>13</sup>C NMR (75 MHz, CDCl<sub>3</sub>)** δ 197.1, 144.8, 134.6, 133.8, 133.3, 133.0, 130.4, 129.4, 129.3, 128.9, 127.8, 127.7, 127.6, 127.0, 126.9, 26.5

**HRMS (ESI-TOF):** m/z calcd. for C<sub>18</sub>H<sub>14</sub>OS ([M+H]<sup>+</sup>) 279.0844, found 279.0844.

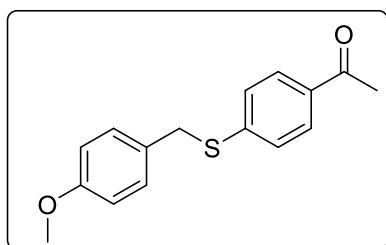

### 1-(4-((4-Methoxybenzyl)thio)phenyl)ethan-1-one (3l)<sup>8</sup>

A 25 mL storage flask was charged with a stir bar, flame dried under vacuum and back filled with nitrogen three times. The flask was then charged with Cs<sub>2</sub>CO<sub>3</sub> (97.7

mg, 0.3 mmol, 1.5 eq.), 4'-Bromoacetophenone (39.8 mg, 0.2 mmol, 1.00 eq.), (4-methoxyphenyl)methanethiol (46.2 mg, 0.3 mmol, 1.5 eq.) and 1.5 mL DMSO. The reaction mixture was evacuated and purged with inert gas (N<sub>2</sub>) three times. The reaction mixture was then placed into an LED-lined beaker and stirred with an air gas tube for cooling. After stirred for 1 hour, the reaction mixture was washed with water, extracted with EtOAc and concentrated in vacuum. The product was isolated by flash chromatography (1:5 EtOAc:hexanes) as white solid (X = Br, 40 mg, 74%).

**Physical State:** white solid;

*R<sub>f</sub>* = 0.5 (silica gel, 1:5 EtOAc:hexanes)

<sup>1</sup>H NMR (300 MHz, CDCl<sub>3</sub>) δ 7.85 (dt, *J* = 8.7, 2.1 Hz, 2H), 7.35 – 7.28 (m, 4H), 6.86 (dt, *J* = 8.7, 2.1 Hz, 2H), 4.19 (s, 2H), 3.81 (s, 3H), 2.57 (s, 3H)

<sup>13</sup>C NMR (75 MHz, CDCl<sub>3</sub>) δ 197.1, 159.0, 144.4, 134.1, 129.9, 128.7, 128.0, 126.9, 114.1, 55.3, 36.6, 26.4

**HRMS (ESI-TOF):** *m/z* calcd. for C<sub>16</sub>H<sub>16</sub>O<sub>2</sub>S ([M+H]<sup>+</sup>) 273.0949, found 273.0947.

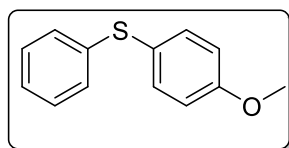

**(4-Methoxyphenyl)(phenyl)sulfane (4a)<sup>9</sup>**

A 25 mL storage flask was charged with a stir bar, flame dried under vacuum and back filled with nitrogen three times. The flask was then charged with Cs<sub>2</sub>CO<sub>3</sub> (97.7 mg, 0.3 mmol, 1.5 eq.), iodobenzene (40.8 mg, 0.2 mmol, 1.00 eq.), 4-methoxybenzenethiol (42.0 mg, 0.3 mmol, 1.5 eq.) and 1.5 mL DMSO. The reaction mixture was evacuated and purged with inert gas (N<sub>2</sub>) three times. The reaction mixture was then placed into an LED-lined beaker and stirred with an air gas tube for cooling. After stirred for 24 hours, the reaction mixture was washed with water, extracted with EtOAc and concentrated in vacuum. The product was isolated by flash chromatography (1:40 EtOAc:hexanes) as pale yellow oil (X = I, 37 mg, 85%).

**Physical State:** pale yellow oil;

*R<sub>f</sub>* = 0.4 (silica gel, hexanes)

<sup>1</sup>H NMR (300 MHz, CDCl<sub>3</sub>) δ 7.49 – 7.41 (m, 2H), 7.32 – 7.11 (m, 5H), 6.93 (dt, *J* = 8.7, 2.7 Hz, 2H), 3.85 (s, 3H)

$^{13}\text{C}$  NMR (75 MHz,  $\text{CDCl}_3$ )  $\delta$  159.8, 138.6, 135.4, 128.9, 128.2, 125.8, 124.3, 115.0, 55.4

HRMS (ESI-TOF):  $m/z$  calcd. for  $\text{C}_{13}\text{H}_{12}\text{OS}$  ( $[\text{M}+\text{H}]^+$ ) 216.0609, found 216.0612.

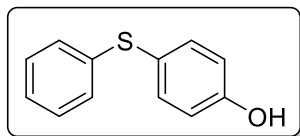

#### 4-(Phenylthio)phenol (4b)<sup>10</sup>

A 25 mL storage flask was charged with a stir bar, flame dried under vacuum and back filled with nitrogen three times. The flask was then charged with  $\text{Cs}_2\text{CO}_3$  (130.3 mg, 0.4 mmol, 2.0 eq.), iodobenzene (40.8 mg, 0.2 mmol, 1.00 eq.), 4-mercaptophenol (37.8 mg, 0.3 mmol, 1.5 eq.) and 1.5 mL DMSO. The reaction mixture was evacuated and purged with inert gas ( $\text{N}_2$ ) three times. The reaction mixture was then placed into an LED-lined beaker and stirred with an air gas tube for cooling. After stirred for 24 hours, the reaction mixture was washed with water, extracted with EtOAc and concentrated in vacuum. The product was isolated by flash chromatography (1:1 EtOAc:hexanes) as white solid (X = I, 10 mg, 25%).

**Physical State:** white solid;

$R_f$  = 0.4 (silica gel, 1:1 EtOAc:hexanes)

$^1\text{H}$  NMR (300 MHz,  $\text{CDCl}_3$ )  $\delta$  7.40 – 7.35 (m, 2H), 7.27 – 7.12 (m, 5H), 6.86 – 6.82 (m, 2H), 4.98 (s, 1H)

$^{13}\text{C}$  NMR (75 MHz,  $\text{CDCl}_3$ )  $\delta$  155.8, 138.4, 135.5, 128.9, 128.4, 125.9, 124.7, 116.5

HRMS (ESI-TOF):  $m/z$  calcd. for  $\text{C}_{12}\text{H}_{10}\text{OS}$  ( $[\text{M}]^+$ ) 202.0452, found 202.0457.

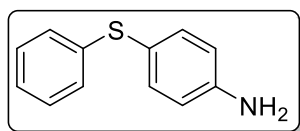

#### 4-(Phenylthio)aniline (4c)<sup>10</sup>

A 25 mL storage flask was charged with a stir bar, flame dried under vacuum and back filled with nitrogen three times. The flask was then charged with  $\text{Cs}_2\text{CO}_3$  (130.3 mg, 0.4 mmol, 2.0 eq.), iodobenzene (40.8 mg, 0.2 mmol, 1.00 eq.), 4-aminobenzenethiol (37.5 mg, 0.3 mmol, 1.5 eq.) and 1.5 mL DMSO. The reaction mixture was evacuated and purged with inert gas ( $\text{N}_2$ ) three times. The reaction mixture was then placed into an LED-lined beaker and stirred with an air gas tube for cooling. After stirred for 24 hours, the reaction mixture was washed with water, extracted with EtOAc and concentrated in vacuum. The product was isolated by flash

chromatography (1:1 EtOAc:hexanes) as yellow solid (X = I, 15 mg, 37%).

**Physical State:** yellow solid;

$R_f$  = 0.4 (silica gel, 1:1 EtOAc:hexanes)

$^1\text{H NMR}$  (300 MHz,  $\text{CDCl}_3$ )  $\delta$  7.34 – 7.30 (m, 2H), 7.24 – 7.19 (m, 2H), 7.15 – 7.07 (m, 3H), 6.70 – 6.66 (m, 2H), 3.78 (s, 2H)

$^{13}\text{C NMR}$  (75 MHz,  $\text{CDCl}_3$ )  $\delta$  147.0, 139.7, 136.1, 128.8, 127.3, 125.2, 120.5, 115.9

**HRMS (ESI-TOF):** m/z calcd. for  $\text{C}_{12}\text{H}_{11}\text{NS}$  ( $[\text{M}]^+$ ) 202.0690, found 202.0691.

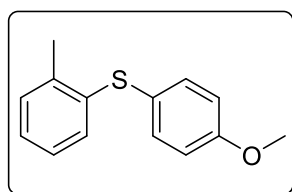

**(4-Methoxyphenyl)(o-tolyl)sulfane (4d)<sup>11</sup>**

A 25 mL storage flask was charged with a stir bar, flame dried under vacuum and back filled with nitrogen three times. The flask was then charged with  $\text{Cs}_2\text{CO}_3$  (97.7 mg, 0.3 mmol, 1.5 eq.), 1-iodo-2-methylbenzene (43.6 mg, 0.2 mmol, 1.00 eq.), 4-methoxybenzenethiol (42.0 mg, 0.3 mmol, 1.5 eq.) and 1.5 mL DMSO. The reaction mixture was evacuated and purged with inert gas ( $\text{N}_2$ ) three times. The reaction mixture was then placed into an LED-lined beaker and stirred with an air gas tube for cooling. After stirred for 20 hours, the reaction mixture was washed with water, extracted with EtOAc and concentrated in vacuum. The product was isolated by flash chromatography (1:40 EtOAc:hexanes) as colorless oil (X = I, 25 mg, 54%).

**Physical State:** colorless oil;

$R_f$  = 0.4 (silica gel, hexanes)

$^1\text{H NMR}$  (300 MHz,  $\text{CDCl}_3$ )  $\delta$  7.36 – 7.31 (m, 2H), 7.19 – 7.17 (m, 1H), 7.13 – 7.03 (m, 2H), 6.99 (dd,  $J$  = 6.6, 1.8 Hz, 1H), 6.91 – 6.87 (m, 2H), 3.82 (s, 3H), 2.39 (s, 3H).

$^{13}\text{C NMR}$  (75 MHz,  $\text{CDCl}_3$ )  $\delta$  159.5, 137.1, 134.5, 130.2, 129.1, 126.5, 126.1, 124.5, 115.0, 55.4, 20.3

**HRMS (ESI-TOF):** m/z calcd. for  $\text{C}_{14}\text{H}_{14}\text{OS}$  ( $[\text{M}]^+$ ) 230.0765, found 230.0772.

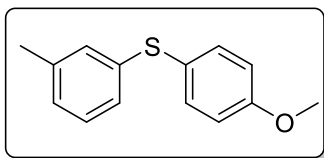

#### (4-Methoxyphenyl)(m-tolyl)sulfane (4e)<sup>12</sup>

A 25 mL storage flask was charged with a stir bar, flame dried under vacuum and back filled with nitrogen three times. The flask was then charged with Cs<sub>2</sub>CO<sub>3</sub> (97.7 mg, 0.3 mmol, 1.5 eq.), 1-iodo-3-methylbenzene (43.6 mg, 0.2 mmol, 1.00 eq.), 4-methoxybenzenethiol (42.0 mg, 0.3 mmol, 1.5 eq.) and 1.5 mL DMSO. The reaction mixture was evacuated and purged with inert gas (N<sub>2</sub>) three times. The reaction mixture was then placed into an LED-lined beaker and stirred with an air gas tube for cooling. After stirred for 20 hours, the reaction mixture was washed with water, extracted with EtOAc and concentrated in vacuum. The product was isolated by flash chromatography (1:40 EtOAc:hexanes) as colorless oil (X = I, 33 mg, 72%).

**Physical State:** colorless oil;

*R<sub>f</sub>* = 0.4 (silica gel, hexanes)

<sup>1</sup>H NMR (300 MHz, CDCl<sub>3</sub>) δ 7.45 – 7.42 (m, 2H), 7.16 (t, *J* = 7.6 Hz, 1H), 7.05 (s, 1H), 7.01 – 6.97 (m, 2H), 6.94 – 6.91 (m, 2H), 3.85 (s, 3H), 2.31 (s, 3H)

<sup>13</sup>C NMR (75 MHz, CDCl<sub>3</sub>) δ 159.7, 138.8, 138.2, 135.1, 129.0, 128.7, 126.8, 125.5, 124.6, 114.9, 55.4, 21.3

HRMS (ESI-TOF): *m/z* calcd. for C<sub>14</sub>H<sub>14</sub>OS ([M]<sup>+</sup>) 230.0765, found 230.0769.

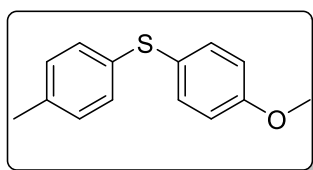

#### (4-Methoxyphenyl)(p-tolyl)sulfane (4f)<sup>13</sup>

A 25 mL storage flask was charged with a stir bar, flame dried under vacuum and back filled with nitrogen three times. The flask was then charged with Cs<sub>2</sub>CO<sub>3</sub> (97.7 mg, 0.3 mmol, 1.5 eq.), 1-iodo-4-methylbenzene (43.6 mg, 0.2 mmol, 1.00 eq.), 4-methoxybenzenethiol (42.0 mg, 0.3 mmol, 1.5 eq.) and 1.5 mL DMSO. The reaction mixture was evacuated and purged with inert gas (N<sub>2</sub>) three times. The reaction mixture was then placed into an LED-lined beaker and stirred with an air gas tube for cooling. After stirred for 20 hours, the reaction mixture was washed with water, extracted with EtOAc and concentrated in vacuum. The product was isolated by

flash chromatography (1:40 EtOAc:hexanes) as colorless oil (X = I, 35 mg, 76%).

**Physical State:** colorless oil;

$R_f$  = 0.4 (silica gel, hexanes)

$^1\text{H NMR}$  (300 MHz,  $\text{CDCl}_3$ )  $\delta$  7.37 (dt,  $J$  = 9.0, 2.7 Hz, 2H), 7.16 – 7.13 (m, 2H), 7.09 – 7.05 (m, 2H), 6.91 – 6.83 (dt,  $J$  = 9.0, 2.7 Hz, 2H), 3.81 (s, 3H), 2.31 (s, 3H)

$^{13}\text{C NMR}$  (75 MHz,  $\text{CDCl}_3$ )  $\delta$  159.5, 136.1, 134.3, 129.8, 129.4, 125.7, 114.9, 55.4, 21.0

**HRMS (ESI-TOF):**  $m/z$  calcd. for  $\text{C}_{14}\text{H}_{14}\text{OS}$  ( $[\text{M}+\text{H}]^+$ ) 230.0765, found 230.0767.

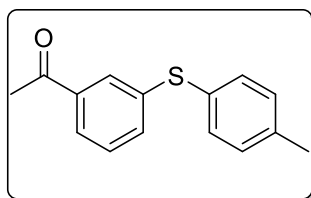

#### 1-(3-(*p*-Tolylthio)phenyl)ethan-1-one (4g)

A 25 mL storage flask was charged with a stir bar, flame dried under vacuum and back filled with nitrogen three times. The flask was then charged with  $\text{Cs}_2\text{CO}_3$  (97.7 mg, 0.3 mmol, 1.5 eq.), 3'-Bromoacetophenone (39.8 mg, 0.2 mmol, 1.00 eq.), *p*-Toluenethiol (37.3 mg, 0.3 mmol, 1.5 eq.) and 1.5 mL DMSO. The reaction mixture was evacuated and purged with inert gas ( $\text{N}_2$ ) three times. The reaction mixture was then placed into an LED-lined beaker and stirred with an air gas tube for cooling. After stirred for 1 hour, the reaction mixture was washed with water, extracted with EtOAc and concentrated in vacuum. The product was isolated by flash chromatography (1:6 EtOAc:hexanes) as white solid (X = I, 43 mg, 89%).

**Physical State:** white solid;

$R_f$  = 0.4 (silica gel, 1:6 EtOAc:hexanes)

$^1\text{H NMR}$  (300 MHz,  $\text{CDCl}_3$ )  $\delta$  7.83 (td,  $J$  = 1.8, 0.6 Hz, 1H), 7.75 (dt,  $J$  = 7.2, 1.6 Hz, 1H), 7.41 – 7.31 (m, 4H), 7.17 (d,  $J$  = 7.8 Hz, 2H), 2.54 (s, 3H), 2.36 (s, 3H).

$^{13}\text{C NMR}$  (75 MHz,  $\text{CDCl}_3$ )  $\delta$  197.5, 138.8, 138.4, 137.8, 133.5, 132.9, 130.3, 130.0, 129.2, 128.8, 126.0, 26.6, 21.2

**HRMS (ESI-TOF):**  $m/z$  calcd. for  $\text{C}_{15}\text{H}_{14}\text{OS}$  ( $[\text{M}+\text{H}]^+$ ) 243.0844, found 243.0844.

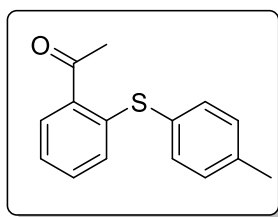

#### 1-(2-(*p*-Tolylthio)phenyl)ethan-1-one (4h)

A 25 mL storage flask was charged with a stir bar, flame dried under vacuum and back filled with nitrogen three times. The flask was then charged with Cs<sub>2</sub>CO<sub>3</sub> (97.7 mg, 0.3 mmol, 1.5 eq.), 3'-Bromoacetophenone (39.8 mg, 0.2 mmol, 1.00 eq.), *p*-Toluenethiol (37.3 mg, 0.3 mmol, 1.5 eq.) and 1.5 mL DMSO. The reaction mixture was evacuated and purged with inert gas (N<sub>2</sub>) three times. The reaction mixture was then placed into an LED-lined beaker and stirred with an air gas tube for cooling. After stirred for 1 hour (X = I) or 12 hours (X = Cl), the reaction mixture was washed with water, extracted with EtOAc and concentrated in vacuum. The product was isolated by flash chromatography (1:6 EtOAc:hexanes) as white solid (X = Cl, 40 mg, 82%; X = I, 37 mg, 76%).

**Physical State:** white solid;

$R_f$  = 0.4 (silica gel, 1:6 EtOAc:hexanes)

<sup>1</sup>H NMR (300 MHz, CDCl<sub>3</sub>) δ 7.82 (dd, *J* = 7.8, 1.5 Hz, 1H), 7.45 – 7.41 (m, 2H), 7.25 – 7.20 (m, 3H), 7.14 (td, *J* = 7.8, 1.5 Hz, 1H), 6.87 (dd, *J* = 8.1, 0.9 Hz, 1H), 2.66 (s, 3H), 2.40 (s, 3H).

<sup>13</sup>C NMR (75 MHz, CDCl<sub>3</sub>) δ 199.1, 142.9, 139.2, 135.4, 134.2, 132.0, 130.6, 130.5, 129.4, 127.8, 124.1, 28.2, 21.3

**HRMS (ESI-TOF):** *m/z* calcd. for C<sub>15</sub>H<sub>14</sub>OS ([M+H]<sup>+</sup>) 243.0844, found 243.0847.

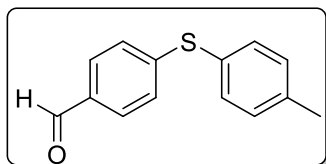

#### 4-(*p*-Tolylthio)benzaldehyde (4i)<sup>14</sup>

A 25 mL storage flask was charged with a stir bar, flame dried under vacuum and back filled with nitrogen three times. The flask was then charged with Cs<sub>2</sub>CO<sub>3</sub> (97.7 mg, 0.3 mmol, 1.5 eq.), 4-iodobenzaldehyde (46.4 mg, 0.2 mmol, 1.00 eq.), *p*-Toluenethiol (37.3 mg, 0.3 mmol, 1.5 eq.) and 1.5 mL DMSO. The reaction mixture was evacuated and purged with inert gas (N<sub>2</sub>) three times. The reaction mixture was



then placed into an LED-lined beaker and stirred with an air gas tube for cooling. After stirred for 12 hours, the reaction mixture was washed with water, extracted with EtOAc and concentrated in vacuum. The product was isolated by flash chromatography (1:6 EtOAc:hexanes) as white solid (X = Cl, 36 mg, 78%; X = I, 40 mg, 87%).

**Physical State:** white solid;

$R_f = 0.4$  (silica gel, 1:6 EtOAc:hexanes)

**$^1\text{H}$  NMR (300 MHz,  $\text{CDCl}_3$ )**  $\delta$  9.92 (s, 1H), 7.74 – 7.70 (m, 2H), 7.45 (dt,  $J = 8.1, 2.1$  Hz, 2H), 7.29 – 7.19 (m, 4H), 2.43 (s, 3H)

**$^{13}\text{C}$  NMR (75 MHz,  $\text{CDCl}_3$ )**  $\delta$  191.2, 148.2, 139.7, 134.8, 133.5, 130.7, 130.1, 127.3, 126.6, 21.3

**HRMS (ESI-TOF):**  $m/z$  calcd. for  $\text{C}_{14}\text{H}_{12}\text{OS}$  ( $[\text{M}+\text{H}]^+$ ) 229.0687, found 229.0687.

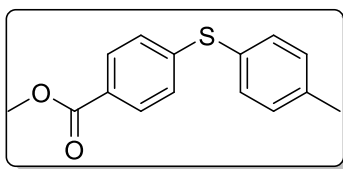

#### **Methyl 4-(*p*-Tolylthio)benzoate (4j)<sup>15</sup>**

A 25 mL storage flask was charged with a stir bar, flame dried under vacuum and back filled with nitrogen three times. The flask was then charged with  $\text{Cs}_2\text{CO}_3$  (97.7 mg, 0.3 mmol, 1.5 eq.), methyl 4-iodobenzoate (52.4 mg, 0.2 mmol, 1.00 eq.), *p*-Toluenethiol (37.3 mg, 0.3 mmol, 1.5 eq.) and 1.5 mL DMSO. The reaction mixture was evacuated and purged with inert gas ( $\text{N}_2$ ) three times. The reaction mixture was then placed into an LED-lined beaker and stirred with an air gas tube for cooling. After stirred for 4 hours, the reaction mixture was washed with water, extracted with EtOAc and concentrated in vacuum. The product was isolated by flash chromatography (1:20 EtOAc:hexanes) as white solid (X = I, 47 mg, 90%, X = Br, 45 mg, 87%, X = Cl, 48 mg, 92%).

**Physical State:** white solid;

$R_f = 0.4$  (silica gel, 1:20 EtOAc:hexanes)

**$^1\text{H}$  NMR (300 MHz,  $\text{CDCl}_3$ )**  $\delta$  7.86 (dt,  $J = 9.0, 1.8$  Hz, 2H), 7.40 (dt,  $J = 8.1, 1.8$  Hz, 2H), 7.23 – 7.20 (m, 2H), 7.17 – 7.13 (m, 2H), 3.88 (s, 3H), 2.39 (s, 3H)

**$^{13}\text{C}$  NMR (75 MHz,  $\text{CDCl}_3$ )**  $\delta$  166.7, 145.4, 139.2, 134.3, 130.5, 130.0, 128.2, 127.1,

126.7, 52.0, 21.3

**HRMS (ESI-TOF):**  $m/z$  calcd. for  $C_{15}H_{14}O_2S$  ( $[M+H]^+$ ) 259.0793, found 259.0796.

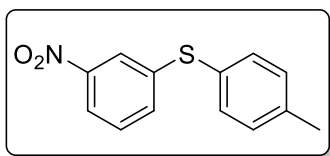

**(3-Nitrophenyl)(p-tolyl)sulfane (4k)**<sup>16</sup>

A 25 mL storage flask was charged with a stir bar, flame dried under vacuum and back filled with nitrogen three times. The flask was then charged with  $Cs_2CO_3$  (97.7 mg, 0.3 mmol, 1.5 eq.), 1-iodo-3-nitrobenzene (49.8 mg, 0.2 mmol, 1.00 eq.), *p*-Toluenethiol (37.3 mg, 0.3 mmol, 1.5 eq.) and 1.5 mL DMSO. The reaction mixture was evacuated and purged with inert gas ( $N_2$ ) three times. The reaction mixture was then placed into an LED-lined beaker and stirred with an air gas tube for cooling. After stirred for 4 hours, the reaction mixture was washed with water, extracted with EtOAc and concentrated in vacuum. The product was isolated by flash chromatography (1:10 EtOAc:hexanes) as yellow solid (X = I, 41 mg, 83%).

**Physical State:** yellow solid;

$R_f$  = 0.4 (silica gel, 1:20 EtOAc:hexanes)

**$^1H$  NMR (300 MHz,  $CDCl_3$ )**  $\delta$  7.97 – 7.94 (m, 2H), 7.46 – 7.35 (m, 4H), 7.25 – 7.22 (m, 2H), 2.40 (s, 3H)

**$^{13}C$  NMR (75 MHz,  $CDCl_3$ )**  $\delta$  148.7, 141.6, 139.6, 134.2, 133.3, 130.7, 129.5, 127.9, 122.2, 120.4, 21.3

**HRMS (ESI-TOF):**  $m/z$  calcd. for  $C_{13}H_{11}NO_2S$  ( $[M+H]^+$ ) 246.0589, found 246.0588.

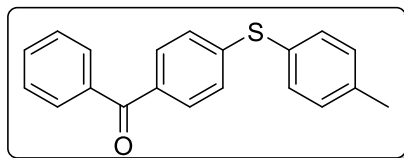

**Phenyl-(4-(p-tolylthio)phenyl)methanone (4l)**<sup>2</sup>

A 25 mL storage flask was charged with a stir bar, flame dried under vacuum and back filled with nitrogen three times. The flask was then charged with  $Cs_2CO_3$  (97.7 mg, 0.3 mmol, 1.5 eq.), (4-bromophenyl)(phenyl)methanone (52.2 mg, 0.2 mmol, 1.00 eq.), *p*-Toluenethiol (37.3 mg, 0.3 mmol, 1.5 eq.) and 1.5 mL DMSO. The reaction mixture was evacuated and purged with inert gas ( $N_2$ ) three times. The

reaction mixture was then placed into an LED-lined beaker and stirred with an air gas tube for cooling. After stirred for 1 hour, the reaction mixture was washed with water, extracted with EtOAc and concentrated in vacuum. The product was isolated by flash chromatography (1:6 EtOAc:hexanes) as white solid (X = Br, 55 mg, 90%).

**Physical State:** white solid;

$R_f$  = 0.4 (silica gel, 1:5 EtOAc:hexanes)

**$^1\text{H}$  NMR (300 MHz,  $\text{CDCl}_3$ )**  $\delta$  7.77 – 7.74 (m, 2H), 7.70 – 7.66 (m, 2H), 7.60 – 7.54 (m, 1H), 7.50 – 7.42 (m, 4H), 7.25 – 7.17 (m, 4H), 2.40 (s, 3H)

**$^{13}\text{C}$  NMR (75 MHz,  $\text{CDCl}_3$ )**  $\delta$  195.7, 145.3, 139.3, 137.7, 134.5, 134.4, 132.2, 130.7, 130.5, 129.8, 128.2, 128.0, 126.5, 21.3

**HRMS (ESI-TOF):**  $m/z$  calcd. for  $\text{C}_{20}\text{H}_{16}\text{OS}$  ( $[\text{M}+\text{H}]^+$ ) 305.1000, found 305.0998.

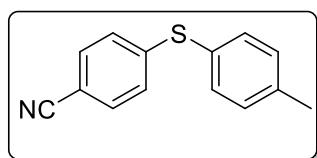

#### 4-(*p*-Tolylthio)benzonitrile (4m)<sup>2</sup>

A 25 mL storage flask was charged with a stir bar, flame dried under vacuum and back filled with nitrogen three times. The flask was then charged with  $\text{Cs}_2\text{CO}_3$  (97.7 mg, 0.3 mmol, 1.5 eq.), 4-bromobenzonitrile (36.4 mg, 0.2 mmol, 1.00 eq.), *p*-Toluenethiol (37.3 mg, 0.3 mmol, 1.5 eq.) and 1.5 mL DMSO. The reaction mixture was evacuated and purged with inert gas ( $\text{N}_2$ ) three times. The reaction mixture was then placed into an LED-lined beaker and stirred with an air gas tube for cooling. After stirred for 1 hour, the reaction mixture was washed with water, extracted with EtOAc and concentrated in vacuum. The product was isolated by flash chromatography (1:10 EtOAc:hexanes) as white solid (X = Br, 32 mg, 71%).

**Physical State:** white solid;

$R_f$  = 0.5 (silica gel, 1:10 EtOAc:hexanes)

**$^1\text{H}$  NMR (300 MHz,  $\text{CDCl}_3$ )**  $\delta$  7.47 – 7.39 (m, 4H), 7.28 – 7.23 (m, 2H), 7.14 – 7.10 (m, 2H), 2.41 (s, 3H)

**$^{13}\text{C}$  NMR (75 MHz,  $\text{CDCl}_3$ )**  $\delta$  146.6, 139.9, 134.9, 132.3, 130.7, 126.8, 126.7, 118.9, 108.3, 21.3

**HRMS (ESI-TOF):**  $m/z$  calcd. for  $C_{14}H_{11}NS$  ( $[M+H]^+$ ) 226.0690, found 226.0692.

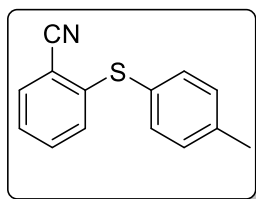

**2-(*p*-Tolylthio)benzonitrile (4n)**<sup>17</sup>

A 25 mL storage flask was charged with a stir bar, flame dried under vacuum and back filled with nitrogen three times. The flask was then charged with  $Cs_2CO_3$  (97.7 mg, 0.3 mmol, 1.5 eq.), 2-chlorobenzonitrile (27.4 mg, 0.2 mmol, 1.00 eq.), *p*-Toluenethiol (37.3 mg, 0.3 mmol, 1.5 eq.) and 1.5 mL DMSO. The reaction mixture was evacuated and purged with inert gas ( $N_2$ ) three times. The reaction mixture was then placed into an LED-lined beaker and stirred with an air gas tube for cooling. After stirred for 4 hours, the reaction mixture was washed with water, extracted with EtOAc and concentrated in vacuum. The product was isolated by flash chromatography (1:7 EtOAc:hexanes) as colorless oil (X = Cl, 40 mg, 88%).

**Physical State:** white solid;

$R_f$  = 0.5 (silica gel, 1:7 EtOAc:hexanes)

**$^1H$  NMR (300 MHz,  $CDCl_3$ )**  $\delta$  7.61 (ddd,  $J$  = 7.7, 1.5, 0.5 Hz, 1H), 7.42 – 7.39 (m, 2H), 7.38 – 7.34 (m, 1H), 7.23 – 7.18 (m, 2H), 7.04 (ddd,  $J$  = 8.1, 1.1, 0.5 Hz, 1H), 2.39 (s, 3H).

**$^{13}C$  NMR (75 MHz,  $CDCl_3$ )**  $\delta$  143.5, 139.5, 134.3, 133.5, 132.8, 130.6, 128.9, 127.6, 125.9, 117.0, 111.9, 21.3

**HRMS (ESI-TOF):**  $m/z$  calcd. for  $C_{14}H_{11}NS$  ( $[M+H]^+$ ) 226.0690, found 226.0694.

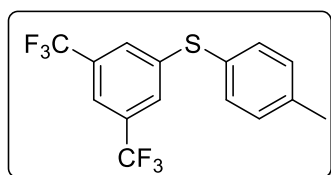

**(3,5-Bis(trifluoromethyl)phenyl)(*p*-tolyl)sulfane (4o)**<sup>18</sup>

A 25 mL storage flask was charged with a stir bar, flame dried under vacuum and back filled with nitrogen three times. The flask was then charged with  $Cs_2CO_3$  (97.7 mg, 0.3 mmol, 1.5 eq.), 1-bromo-3,5-bis(trifluoromethyl)benzene (58.6 mg, 0.2 mmol, 1.00 eq.), *p*-Toluenethiol (37.3 mg, 0.3 mmol, 1.5 eq.) and 1.5 mL DMSO. The

reaction mixture was evacuated and purged with inert gas (N<sub>2</sub>) three times. The reaction mixture was then placed into an LED-lined beaker and stirred with an air gas tube for cooling. After stirred for 16 hours, the reaction mixture was washed with water, extracted with EtOAc and concentrated in vacuum. The product was isolated by flash chromatography (1:40 EtOAc:hexanes) as colorless oil (X = Br, 34 mg, 50%)..

**Physical State:** colorless oil;

$R_f$  = 0.4 (silica gel, hexanes).

**<sup>1</sup>H NMR (300 MHz, CDCl<sub>3</sub>)** δ 7.59 (dd,  $J$  = 1.5, 0.9 Hz, 1H), 7.52 – 7.51 (m, 2H), 7.43 – 7.39 (m, 2H), 7.27 – 7.24 (m, 2H), 2.41 (s, 3H).

**<sup>13</sup>C NMR (75 MHz, CDCl<sub>3</sub>)** δ 142.6, 140.0, 134.3, 132.3 (q,  $J$  = 33.1 Hz), 130.9, 128.9, 127.0 (m), 123.0 (q  $J$  = 270.0 Hz), 119.1(m), 21.3.

**HRMS (ESI-TOF):**  $m/z$  calcd. for C<sub>15</sub>H<sub>10</sub>F<sub>6</sub>S ([M]<sup>+</sup>) 336.0407, found 336.0403.

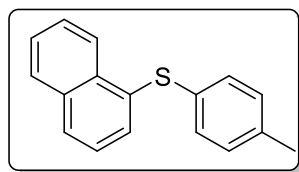

#### **Naphthalen-1-yl(*p*-tolyl)sulfane (4p)<sup>19</sup>**

A 25 mL storage flask was charged with a stir bar, flame dried under vacuum and back filled with nitrogen three times. The flask was then charged with Cs<sub>2</sub>CO<sub>3</sub> (97.7 mg, 0.3 mmol, 1.5 eq.), 1-bromonaphthalene (41.4 mg, 0.2 mmol, 1.00 eq.), *p*-Toluenethiol (37.3 mg, 0.3 mmol, 1.5 eq.) and 1.5 mL DMSO. The reaction mixture was evacuated and purged with inert gas (N<sub>2</sub>) three times. The reaction mixture was then placed into an LED-lined beaker and stirred with an air gas tube for cooling. After stirred for 16 hours, the reaction mixture was washed with water, extracted with EtOAc and concentrated in vacuum. The product was isolated by flash chromatography (1:40 EtOAc:hexanes) as white solid (X = Br, 42 mg, 84%).

**Physical State:** white solid;

$R_f$  = 0.4 (silica gel, hexanes).

**<sup>1</sup>H NMR (300 MHz, CDCl<sub>3</sub>)** δ 8.43 – 8.39 (m, 1H), 7.90 – 7.80 (m, 2H), 7.58 – 7.50 (m, 3H), 7.43 – 7.38(m, 1H), 7.22 – 7.17 (m, 2H), 7.11 – 7.07 (m, 2H), 2.32 (s, 3H)

**<sup>13</sup>C NMR (75 MHz, CDCl<sub>3</sub>)** δ 136.6, 134.1, 133.1, 132.7, 132.5, 131.0, 130.3, 130.0,

128.5, 128.4, 126.7, 126.4, 125.8, 125.4, 21.1

**HRMS (ESI-TOF):**  $m/z$  calcd. for  $C_{17}H_{14}S$  ( $[M]^+$ ) 250.0816, found 250.0818.

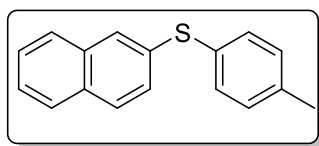

**Naphthalen-2-yl(*p*-tolyl)sulfane (4q)<sup>20</sup>**

A 25 mL storage flask was charged with a stir bar, flame dried under vacuum and back filled with nitrogen three times. The flask was then charged with  $Cs_2CO_3$  (97.7 mg, 0.3 mmol, 1.5 eq.), 2-bromonaphthalene (41.4 mg, 0.2 mmol, 1.00 eq.), *p*-Toluenethiol (37.3 mg, 0.3 mmol, 1.5 eq.) and 1.5 mL DMSO. The reaction mixture was evacuated and purged with inert gas ( $N_2$ ) three times. The reaction mixture was then placed into an LED-lined beaker and stirred with an air gas tube for cooling. After stirred for 13 hours, the reaction mixture was washed with water, extracted with EtOAc and concentrated in vacuum. The product was isolated by flash chromatography (1:40 EtOAc:hexanes) as white solid (X = Br, 28 mg, 56%).

**Physical State:** white solid;

$R_f$  = 0.4 (silica gel, hexanes).

**$^1H$  NMR (300 MHz,  $CDCl_3$ )**  $\delta$  7.82 – 7.71 (m, 4H), 7.50 – 7.43 (m, 2H), 7.40 – 7.34 (m, 3H), 7.19 – 7.15 (m, 2H), 2.38 (s, 3H)

**$^{13}C$  NMR (75 MHz,  $CDCl_3$ )**  $\delta$  137.6, 134.4, 133.8, 132.1, 132.0, 131.4, 130.1, 128.7, 128.4, 127.9, 127.7, 127.3, 126.5, 125.9, 21.2

**HRMS (ESI-TOF):**  $m/z$  calcd. for  $C_{17}H_{14}S$  ( $[M]^+$ ) 250.0816, found 250.0817.

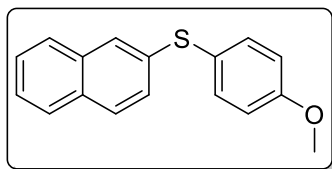

**(4-Methoxyphenyl)(naphthalen-2-yl)sulfane (4r)<sup>21</sup>**

A 25 mL storage flask was charged with a stir bar, flame dried under vacuum and back filled with nitrogen three times. The flask was then charged with  $Cs_2CO_3$  (97.7 mg, 0.3 mmol, 1.5 eq.), 1-bromonaphthalene (41.4 mg, 0.2 mmol, 1.00 eq.), 4-methoxybenzenethiol (42.0 mg, 0.3 mmol, 1.5 eq.) and 1.5 mL DMSO. The reaction mixture was evacuated and purged with inert gas ( $N_2$ ) three times. The

reaction mixture was then placed into an LED-lined beaker and stirred with an air gas tube for cooling. After stirred for 13 hours, the reaction mixture was washed with water, extracted with EtOAc and concentrated in vacuum. The product was isolated by flash chromatography (1:40 EtOAc:hexanes) as white solid (X = Br, 44 mg, 81%).

**Physical State:** white solid;

$R_f$  = 0.4 (silica gel, hexanes).

$^1\text{H NMR}$  (300 MHz,  $\text{CDCl}_3$ )  $\delta$  7.79 – 7.62 (m, 4H), 7.49 – 7.39 (m, 4H), 7.31 (dd,  $J$  = 8.7, 1.8 Hz, 1H), 6.95 – 6.90 (m, 2H), 3.84 (s, 3H).

$^{13}\text{C NMR}$  (75 MHz,  $\text{CDCl}_3$ )  $\delta$  159.9, 135.9, 135.2, 133.8, 131.7, 128.5, 127.7, 127.2, 126.7, 126.5, 126.4, 125.6, 124.4, 115.1, 55.4

**HRMS (ESI-TOF):**  $m/z$  calcd. for  $\text{C}_{17}\text{H}_{14}\text{OS}$  ( $[\text{M}]^+$ ) 266.0765, found 266.0769.

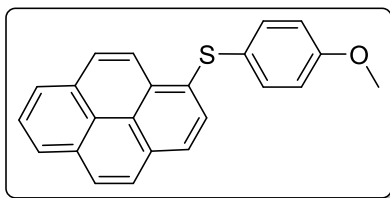

#### (4-Methoxyphenyl)(pyren-1-yl)sulfane (4s)

A 25 mL storage flask was charged with a stir bar, flame dried under vacuum and back filled with nitrogen three times. The flask was then charged with  $\text{Cs}_2\text{CO}_3$  (97.7 mg, 0.3 mmol, 1.5 eq.), 1-bromopyrene (56.2 mg, 0.2 mmol, 1.00 eq.), 4-methoxybenzenethiol (42.0 mg, 0.3 mmol, 1.5 eq.) and 1.5 mL DMSO. The reaction mixture was evacuated and purged with inert gas ( $\text{N}_2$ ) three times. The reaction mixture was then placed into an LED-lined beaker and stirred with an air gas tube for cooling. After stirred for 13 hours, the reaction mixture was washed with water, extracted with EtOAc and concentrated in vacuum. The product was isolated by flash chromatography (1:40 EtOAc:hexanes) as yellow solid (X = Br, 57 mg, 83%).

**Physical State:** yellow solid;

$R_f$  = 0.4 (silica gel, hexanes).

$^1\text{H NMR}$  (300 MHz,  $\text{CDCl}_3$ )  $\delta$  8.68 (d,  $J$  = 9.3 Hz, 1H), 8.23 – 8.20 (m, 2H), 8.16 (d,  $J$  = 9.3 Hz, 1H), 8.10 – 8.01 (m, 4H), 7.92 (d,  $J$  = 8.1 Hz, 1H), 7.39 – 7.36 (m, 2H), 6.90 – 6.87 (m, 2H), 3.81 (s, 3H).

$^{13}\text{C}$  NMR (75 MHz,  $\text{CDCl}_3$ )  $\delta$  159.2, 133.3, 132.7, 131.5, 131.4, 131.0, 130.5, 130.4, 129.4, 128.1, 127.5, 127.3, 126.4, 126.2, 125.3, 125.1, 124.5, 124.3, 115.0, 114.6, 55.4

HRMS (ESI-TOF):  $m/z$  calcd. for  $\text{C}_{23}\text{H}_{16}\text{OS}$  ( $[\text{M}]^+$ ) 340.0922, found 340.0926.

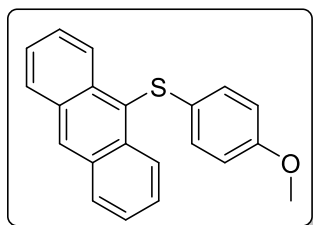

#### Anthracen-9-yl(4-methoxyphenyl)sulfane (4t)

A 25 mL storage flask was charged with a stir bar, flame dried under vacuum and back filled with nitrogen three times. The flask was then charged with  $\text{Cs}_2\text{CO}_3$  (97.7 mg, 0.3 mmol, 1.5 eq.), 9-bromoanthracene (51.4 mg, 0.2 mmol, 1.00 eq.), 4-methoxybenzenethiol (42.0 mg, 0.3 mmol, 1.5 eq.) and 1.5 mL DMSO. The reaction mixture was evacuated and purged with inert gas ( $\text{N}_2$ ) three times. The reaction mixture was then placed into an LED-lined beaker and stirred with an air gas tube for cooling. After stirred for 13 hours, the reaction mixture was washed with water, extracted with EtOAc and concentrated in vacuum. The product was isolated by flash chromatography (1:40 EtOAc:hexanes) as yellow solid (X = Br, 53 mg, 84%).

**Physical State:** yellow solid;

$R_f$  = 0.4 (silica gel, hexanes).

$^1\text{H}$  NMR (300 MHz,  $\text{CDCl}_3$ )  $\delta$  8.91–8.87 (m, 1H), 8.57 (s, 1H), 8.06–8.03 (m, 2H), 7.59–7.48 (m, 4H), 6.99–6.96 (m, 2H), 6.68–6.65 (m, 2H), 3.68 (s, 3H)

$^{13}\text{C}$  NMR (75 MHz,  $\text{CDCl}_3$ )  $\delta$  157.7, 134.8, 132.0, 130.0, 129.4, 128.9, 128.5, 127.1, 127.0, 126.9, 125.5, 114.6, 55.2

HRMS (ESI-TOF):  $m/z$  calcd. for  $\text{C}_{21}\text{H}_{16}\text{OS}$  ( $[\text{M}]^+$ ) 316.0922, found 316.0926.

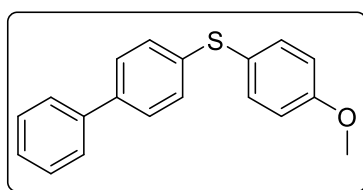

#### [1,1'-Biphenyl]-4-yl(4-methoxyphenyl)sulfane (4u)<sup>22</sup>



A 25 mL storage flask was charged with a stir bar, flame dried under vacuum and back filled with nitrogen three times. The flask was then charged with Cs<sub>2</sub>CO<sub>3</sub> (97.7 mg, 0.3 mmol, 1.5 eq.), 4-bromo-1,1'-biphenyl (46.6 mg, 0.2 mmol, 1.00 eq.), 4-methoxybenzenethiol (42.0 mg, 0.3 mmol, 1.5 eq.) and 1.5 mL DMSO. The reaction mixture was evacuated and purged with inert gas (N<sub>2</sub>) three times. The reaction mixture was then placed into an LED-lined beaker and stirred with an air gas tube for cooling. After stirred for 13 hours, the reaction mixture was washed with water, extracted with EtOAc and concentrated in vacuum. The product was isolated by flash chromatography (1:40 EtOAc:hexanes) as white solid (X = Br, 42 mg, 70%).

**Physical State:** white solid;

$R_f$  = 0.4 (silica gel, hexanes).

<sup>1</sup>H NMR (300 MHz, CDCl<sub>3</sub>) δ 7.57 – 7.54 (m, 2H), 7.50 – 7.40 (m, 6H), 7.36 – 7.31 (m, 1H), 7.27 – 7.23 (m, 2H), 6.96 – 6.92 (m, 2H), 3.84 (s, 3H)

<sup>13</sup>C NMR (75 MHz, CDCl<sub>3</sub>) δ 159.9, 140.5, 138.8, 137.8, 135.4, 128.8, 128.5, 127.6, 127.3, 126.9, 124.2, 115.1, 55.4

HRMS (ESI-TOF): m/z calcd. for C<sub>19</sub>H<sub>16</sub>OS ([M+H]<sup>+</sup>) 293.1000, found. 293.0995

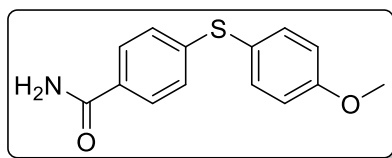

#### 4-((4-Methoxyphenyl)thio)benzamide (4v)<sup>23</sup>

A 25 mL storage flask was charged with a stir bar, flame dried under vacuum and back filled with nitrogen three times. The flask was then charged with Cs<sub>2</sub>CO<sub>3</sub> (195.4 mg, 0.6 mmol, 1.5 eq.), 4-bromobenzamide (80.42 mg, 0.4 mmol, 1.00 eq.), 4-methoxybenzenethiol (84.0 mg, 0.6 mmol, 1.5 eq.) and 3.0 mL DMSO. The reaction mixture was evacuated and purged with inert gas (N<sub>2</sub>) three times. The reaction mixture was then placed into an LED-lined beaker and stirred with an air gas tube for cooling. After stirred for 16 hours, the reaction mixture was washed with water, extracted with EtOAc and concentrated in vacuum. The product was isolated by flash chromatography (4:1 EtOAc:hexanes) as white solid (X = Br, 83 mg, 80%).

**Physical State:** white solid;

$R_f$  = 0.5 (silica gel, 4:1 EtOAc:hexanes)

<sup>1</sup>H NMR (300 MHz, d<sub>6</sub>-DMSO) δ 7.91 (s, 1H), 7.77 (d, *J* = 8.7 Hz, 2H), 7.48 (d, *J* =

8.9 Hz, 2H), 7.33 (s, 1H), 7.12 – 7.01 (m, 4H), 3.81 (s, 3H).

$^{13}\text{C}$  NMR (75 MHz,  $d_6$ -DMSO)  $\delta$  167.7, 160.6, 143.0, 136.7, 131.8, 128.7, 126.4, 121.8, 116.1, 55.8

HRMS (ESI-TOF):  $m/z$  calcd. for  $\text{C}_{14}\text{H}_{13}\text{NO}_2\text{S}$  ( $[\text{M}+\text{H}]^+$ ) 260.0745, found 260.0748.

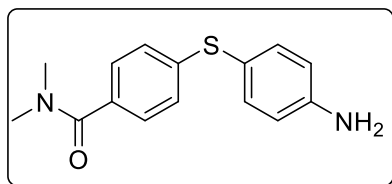

#### 4-((4-Aminophenyl)thio)-*N,N*-dimethylbenzamide (4w)

A 25 mL storage flask was charged with a stir bar, flame dried under vacuum and back filled with nitrogen three times. The flask was then charged with  $\text{Cs}_2\text{CO}_3$  (130.3 mg, 0.4 mmol, 2.0 eq.), 4-Iodo-*N,N*-dimethylbenzamide (55.0 mg, 0.2 mmol, 1.00 eq.), 4-aminobenzenethiol (37.5 mg, 0.3 mmol, 1.5 eq.) and 1.5 mL DMSO. The reaction mixture was evacuated and purged with inert gas ( $\text{N}_2$ ) three times. The reaction mixture was then placed into an LED-lined beaker and stirred with an air gas tube for cooling. After stirred for 16 hours, the reaction mixture was washed with water, extracted with EtOAc and concentrated in vacuum. The product was isolated by flash chromatography (6:1 EtOAc:hexanes) as white solid (X = I, 27 mg, 49%).

**Physical State:** white solid;

$R_f$  = 0.4 (silica gel, 6:1 EtOAc:hexanes)

$^1\text{H}$  NMR (300 MHz,  $\text{CDCl}_3$ )  $\delta$  7.33 – 7.26 (m, 4H), 7.10 – 7.07 (m, 2H), 6.69 – 6.66 (m, 2H), 3.94 (s, 2H), 3.07 (s, 3H), 2.99 (s, 3H)

$^{13}\text{C}$  NMR (75 MHz,  $\text{CDCl}_3$ )  $\delta$  171.3, 147.7, 142.5, 136.6, 132.7, 127.7, 126.1, 118.7, 115.9, 39.6, 35.4

HRMS (ESI-TOF):  $m/z$  calcd. for  $\text{C}_{15}\text{H}_{16}\text{N}_2\text{OS}$  ( $[\text{M}+\text{H}]^+$ ) 273.1062, found 273.1054.

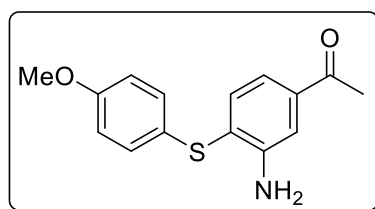

#### 1-(3-Amino-4-((4-methoxyphenyl)thio)phenyl)ethan-1-one (4x)

A 25 mL storage flask was charged with a stir bar, flame dried under vacuum and back filled with nitrogen three times. The flask was then charged with Cs<sub>2</sub>CO<sub>3</sub> (130.3 mg, 0.4 mmol, 2.0 eq.), 3'-Amino-4'-bromoacetophenone (42.8 mg, 0.2 mmol, 1.00 eq.), 4-methoxybenzenethiol (42.0 mg, 0.3 mmol, 1.5 eq.) and 1.5 mL DMSO. The reaction mixture was evacuated and purged with inert gas (N<sub>2</sub>) three times. The reaction mixture was then placed into an LED-lined beaker and stirred with an air gas tube for cooling. After stirred for 2 hours, the reaction mixture was washed with water, extracted with EtOAc and concentrated in vacuum. The product was isolated by flash chromatography (1:2 EtOAc:hexanes) as pale yellow oil (X = Br, 36 mg, 66%).

**Physical State:** pale yellow oil;

*R<sub>f</sub>* = 0.3 (silica gel, 1:2 EtOAc:hexanes)

<sup>1</sup>H NMR (400 MHz, CDCl<sub>3</sub>) δ 7.28 (d, *J* = 1.6 Hz, 1H), 7.26 – 7.19 (m, 4H), 6.88 – 6.77 (m, 2H), 4.27 (s, 2H), 3.77 (s, 3H), 2.52 (s, 3H).

<sup>13</sup>C NMR (75 MHz, CDCl<sub>3</sub>) δ 197.9, 159.3, 146.4, 137.6, 133.5, 132.2, 124.9, 124.2, 118.7, 115.1, 114.3, 55.4), 26.6

HRMS (ESI-TOF): *m/z* calcd. for C<sub>15</sub>H<sub>15</sub>NO<sub>2</sub>S ([M+H]<sup>+</sup>) 274.0902, found 274.0904.

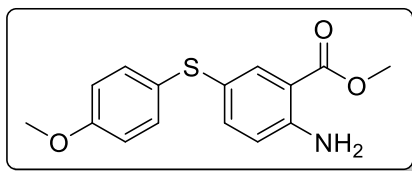

#### **Methyl 2-amino-5-((4-methoxyphenyl)thio)benzoate (4y)**

A 25 mL storage flask was charged with a stir bar, flame dried under vacuum and back filled with nitrogen three times. The flask was then charged with Cs<sub>2</sub>CO<sub>3</sub> (130.3 mg, 0.4 mmol, 2.0 eq.), methyl 2-amino-5-iodobenzoate (55.4 mg, 0.2 mmol, 1.00 eq.), 4-methoxybenzenethiol (42.0 mg, 0.3 mmol, 1.5 eq.) and 1.5 mL DMSO. The reaction mixture was evacuated and purged with inert gas (N<sub>2</sub>) three times. The reaction mixture was then placed into an LED-lined beaker and stirred with an air gas tube for cooling. After stirred for 4 hours, the reaction mixture was washed with water, extracted with EtOAc and concentrated in vacuum. The product was isolated by flash chromatography (1:2 EtOAc:hexanes) as pale yellow oil (X = I, 34 mg, 52%).

**Physical State:** pale yellow oil;

*R<sub>f</sub>* = 0.3 (silica gel, 1:2 EtOAc:hexanes)

<sup>1</sup>H NMR (400 MHz, CDCl<sub>3</sub>) δ 8.03 (dd, *J* = 0.3, 2.1 Hz, 1H), 7.32 (dd, *J* = 8.4, 2.3

Hz, 1H), 7.25 – 7.20 (m, 2H), 6.86 – 6.81 (m, 2H), 6.69 – 6.61 (dd,  $J = 0.3, 8.4$  Hz, 1H), 5.86 (s, 2H), 3.87 (s, 3H), 3.79 (s, 3H)..

$^{13}\text{C}$  NMR (75 MHz,  $\text{CDCl}_3$ )  $\delta$  168.0, 158.6, 150.1, 139.0, 136.2, 131.2, 128.7, 121.1, 117.8, 114.7, 111.2, 55.4, 51.7

HRMS (ESI-TOF):  $m/z$  calcd. for  $\text{C}_{15}\text{H}_{15}\text{NO}_2\text{S}$  ( $[\text{M}]^+$ ) 289.0773, found 289.0772.

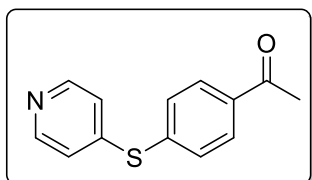

### 1-(4-(Pyridin-4-ylthio)phenyl)ethan-1-one (5a)

A 25 mL storage flask was charged with a stir bar, flame dried under vacuum and back filled with nitrogen three times. The flask was then charged with  $\text{Cs}_2\text{CO}_3$  (97.7 mg, 0.3 mmol, 1.5 eq.), 4'-Bromoacetophenone (39.8 mg, 0.2 mmol, 1.00 eq.), pyridine-4-thiol (33.3 mg, 0.3 mmol, 1.5 eq.) and 1.5 mL DMSO. The reaction mixture was evacuated and purged with inert gas ( $\text{N}_2$ ) three times. The reaction mixture was then placed into an LED-lined beaker and stirred with an air gas tube for cooling. After stirred for 14 hours, the reaction mixture was washed with water, extracted with EtOAc and concentrated in vacuum. The product was isolated by flash chromatography (3:1 EtOAc:hexanes) as yellow solid ( $X = \text{Br}$ , 38 mg, 82%).

**Physical State:** yellow solid;

$R_f = 0.4$  (silica gel, 3:1 EtOAc:hexanes)

$^1\text{H}$  NMR (300 MHz,  $\text{CDCl}_3$ )  $\delta$  8.42 (dd,  $J = 4.5, 1.6$  Hz, 2H), 8.00 – 7.95 (m, 2H), 7.59 – 7.55 (m, 2H), 7.06 (dd,  $J = 4.5, 1.5$  Hz, 2H), 2.62 (s, 3H)

$^{13}\text{C}$  NMR (75 MHz,  $\text{CDCl}_3$ )  $\delta$  197.0, 149.9, 147.7, 137.1, 137.0, 133.4, 129.4, 122.4, 26.6

HRMS (ESI-TOF):  $m/z$  calcd. for  $\text{C}_{13}\text{H}_{11}\text{NOS}$  ( $[\text{M}+\text{H}]^+$ ) 230.0640, found 230.0645.

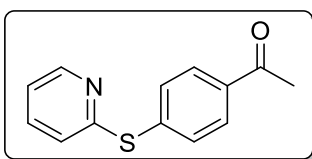

### 1-(4-(Pyridin-2-ylthio)phenyl)ethan-1-one (5b)<sup>24</sup>

A 25 mL storage flask was charged with a stir bar, flame dried under vacuum and back filled with nitrogen three times. The flask was then charged with Cs<sub>2</sub>CO<sub>3</sub> (97.7 mg, 0.3 mmol, 1.5 eq.), 4'-Bromoacetophenone (39.8 mg, 0.2 mmol, 1.00 eq.), pyridine-2-thiol (33.3 mg, 0.3 mmol, 1.5 eq.) and 1.5 mL DMSO. The reaction mixture was evacuated and purged with inert gas (N<sub>2</sub>) three times. The reaction mixture was then placed into an LED-lined beaker and stirred with an air gas tube for cooling. After stirred for 1 hours, the reaction mixture was washed with water, extracted with EtOAc and concentrated in vacuum. The product was isolated by flash chromatography (3:1 EtOAc:hexanes) as yellow solid (X = Br, 32 mg, 70%).

**Physical State:** yellow solid;

$R_f$  = 0.4 (silica gel, 3:1 EtOAc:hexanes)

**<sup>1</sup>H NMR (300 MHz, CDCl<sub>3</sub>)** δ 8.48 (ddd,  $J$  = 4.9, 1.9, 0.9 Hz, 1H), 7.96 – 7.92 (m, 2H), 7.61 – 7.57 (m, 2H), 7.56 – 7.52 (m, 1H), 7.15 – 7.07 (m, 2H), 2.60 (s, 3H)

**<sup>13</sup>C NMR (75 MHz, CDCl<sub>3</sub>)** δ 197.2, 158.7, 150.1, 138.7, 137.0, 136.5, 132.8, 129.1, 123.5, 121.1, 26.6

**HRMS (ESI-TOF):**  $m/z$  calcd. for C<sub>13</sub>H<sub>11</sub>NOS ([M+H]<sup>+</sup>) 230.0640, found 230.0645.

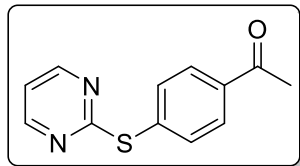

### 1-(4-(Pyrimidin-2-ylthio)phenyl)ethan-1-one (5c)

A 25 mL storage flask was charged with a stir bar, flame dried under vacuum and back filled with nitrogen three times. The flask was then charged with Cs<sub>2</sub>CO<sub>3</sub> (97.7 mg, 0.3 mmol, 1.5 eq.), 4'-Bromoacetophenone (39.8 mg, 0.2 mmol, 1.00 eq.), pyrimidine-2-thiol (33.6 mg, 0.3 mmol, 1.5 eq.) and 1.5 mL DMSO. The reaction mixture was evacuated and purged with inert gas (N<sub>2</sub>) three times. The reaction mixture was then placed into an LED-lined beaker and stirred with an air gas tube for cooling. After stirred for 14 hours, the reaction mixture was washed with water, extracted with EtOAc and concentrated in vacuum. The product was isolated by flash chromatography (1:1 EtOAc:hexanes) as white solid (X = Br, 35 mg, 76%).

**Physical State:** white solid;

$R_f$  = 0.1 (silica gel, 1:4 EtOAc:hexanes)

**<sup>1</sup>H NMR (300 MHz, CDCl<sub>3</sub>)** δ 8.50 (d,  $J$  = 4.8 Hz, 2H), 8.02 – 7.97 (m, 2H), 7.75 –

7.71 (m, 2H), 7.02 (t,  $J = 4.8$  Hz, 1H), 2.62 (s, 3H).

$^{13}\text{C}$  NMR (75 MHz,  $\text{CDCl}_3$ )  $\delta$  197.3, 171.7, 157.7, 137.1, 135.7, 134.6, 128.8, 117.5, 26.7

HRMS (ESI-TOF):  $m/z$  calcd. for  $\text{C}_{12}\text{H}_{10}\text{N}_2\text{OS}$  ( $[\text{M}+\text{H}]^+$ ) 231.0592, found 231.0594.

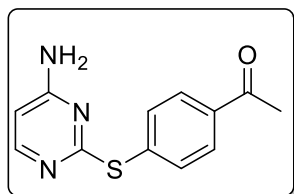

### 1-(4-((4-Aminopyrimidin-2-yl)thio)phenyl)ethan-1-one (5d)

A 25 mL storage flask was charged with a stir bar, flame dried under vacuum and back filled with nitrogen three times. The flask was then charged with  $\text{Cs}_2\text{CO}_3$  (130.3 mg, 0.4 mmol, 2.0 eq.), 4'-Bromoacetophenone (39.8 mg, 0.2 mmol, 1.00 eq.), 4-aminopyrimidine-2-thiol (38.1 mg, 0.3 mmol, 1.5 eq.) and 1.5 mL DMSO. The reaction mixture was evacuated and purged with inert gas ( $\text{N}_2$ ) three times. The reaction mixture was then placed into an LED-lined beaker and stirred with an air gas tube for cooling. After stirred for 12 hours, the reaction mixture was washed with water, extracted with EtOAc and concentrated in vacuum. The product was isolated by flash chromatography (3:1 EtOAc:hexanes) as white solid (X = Br, 41 mg, 83%).

**Physical State:** white solid;

$R_f = 0.1$  (silica gel, 1:1 EtOAc:hexanes)

$^1\text{H}$  NMR (300 MHz,  $d_6$ -DMSO)  $\delta$  7.98 – 7.94 (m, 2H), 7.86 (d,  $J = 6.0$  Hz, 1H), 7.73 – 7.69 (m, 2H), 7.03 (s, 2H), 6.20 (d,  $J = 6.7$  Hz, 1H), 2.60 (s, 3H)

$^{13}\text{C}$  NMR (75 MHz,  $d_6$ -DMSO)  $\delta$  197.8, 169.1, 163.8, 155.5, 137.1, 136.6, 134.3, 128.9, 102.8, 27.2

HRMS (ESI-TOF):  $m/z$  calcd. for  $\text{C}_{12}\text{H}_{11}\text{N}_3\text{OS}$  ( $[\text{M}+\text{H}]^+$ ) 246.0701, found 246.0709.

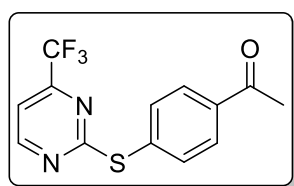

### 1-(4-((4-(Trifluoromethyl)pyrimidin-2-yl)thio)phenyl)ethan-1-one (5e)

A 25 mL storage flask was charged with a stir bar, flame dried under vacuum and

back filled with nitrogen three times. The flask was then charged with Cs<sub>2</sub>CO<sub>3</sub> (97.7 mg, 0.3 mmol, 1.5 eq.), 4'-Bromoacetophenone (39.8 mg, 0.2 mmol, 1.00 eq.), 4-(trifluoromethyl)pyrimidine-2-thiol (54.0 mg, 0.3 mmol, 1.5 eq.) and 1.5 mL DMSO. The reaction mixture was evacuated and purged with inert gas (N<sub>2</sub>) three times. The reaction mixture was then placed into an LED-lined beaker and stirred with an air gas tube for cooling. After stirred for 22 hours, the reaction mixture was washed with water, extracted with EtOAc and concentrated in vacuum. The product was isolated by flash chromatography (1:2 EtOAc:hexanes) as yellow solid (X = Br, 45 mg, 79%).

**Physical State:** yellow solid;

*R<sub>f</sub>* = 0.2 (silica gel, 1:4 EtOAc:hexanes)

<sup>1</sup>H NMR (300 MHz, CDCl<sub>3</sub>) δ 8.72 (dd, *J* = 4.8, 0.5 Hz, 1H), 8.03 – 7.99 (m, 2H), 7.76 – 7.71 (m, 2H), 7.32 (d, *J* = 5.1 Hz, 1H), 2.64 (s, 3H)

<sup>13</sup>C NMR (75 MHz, CDCl<sub>3</sub>) δ 197.3, 173.2, 159.8, 156.1 (q, *J* = 36.7 Hz), 137.5, 134.7, 134.4, 128.9, 120.0 (q, *J* = 273.7 Hz), 112.8 (q, *J* = 2.6 Hz), 26.7.

**HRMS (ESI-TOF):** *m/z* calcd. for C<sub>13</sub>H<sub>9</sub>F<sub>3</sub>N<sub>2</sub>OS ([M+H]<sup>+</sup>) 299.0466, found 299.0458.

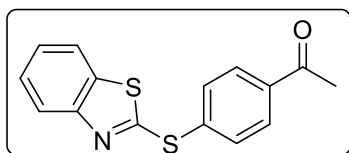

**1-(4-(Benzo[d]thiazol-2-ylthio)phenyl)ethan-1-one (5f)**

A 25 mL storage flask was charged with a stir bar, flame dried under vacuum and back filled with nitrogen three times. The flask was then charged with Cs<sub>2</sub>CO<sub>3</sub> (97.7 mg, 0.3 mmol, 1.5 eq.), 4'-Bromoacetophenone (39.8 mg, 0.2 mmol, 1.00 eq.), benzo[*d*]thiazole-2-thiol (40.1 mg, 0.3 mmol, 1.5 eq.) and 1.5 mL DMSO. The reaction mixture was evacuated and purged with inert gas (N<sub>2</sub>) three times. The reaction mixture was then placed into an LED-lined beaker and stirred with an air gas tube for cooling. After stirred for 21 hours, the reaction mixture was washed with water, extracted with EtOAc and concentrated in vacuum. The product was isolated by flash chromatography (1:3 EtOAc:hexanes) as white solid (X = Br, 50 mg, 87%).

**Physical State:** white solid;

*R<sub>f</sub>* = 0.3 (silica gel, 1:4 EtOAc:hexanes)

<sup>1</sup>H NMR (300 MHz, CDCl<sub>3</sub>) δ 8.02 (dd, *J* = 8.7, 2.1 Hz, 2H), 7.96 – 7.93 (m, 1H),

7.79 (dd,  $J = 8.7, 2.1$  Hz, 2H), 7.75 – 7.72 (m, 1H), 7.49 – 7.43 (m, 1H), 7.37 – 7.28 (m, 1H), 2.65 (s, 3H).

$^{13}\text{C}$  NMR (75 MHz,  $\text{CDCl}_3$ )  $\delta$  197.0, 165.7, 153.6, 137.6, 136.6, 135.9, 133.6, 129.4, 126.4, 124.9, 122.4, 120.9, 26.7

HRMS (ESI-TOF):  $m/z$  calcd. for  $\text{C}_{15}\text{H}_{11}\text{NOS}_2$  ( $[\text{M}+\text{H}]^+$ ) 286.0360, found 286.0363.

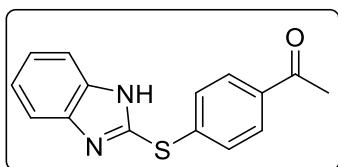

### 1-(4-((1H-benzo[d]imidazol-2-yl)thio)phenyl)ethan-1-one (5g)

A 25 mL storage flask was charged with a stir bar, flame dried under vacuum and back filled with nitrogen three times. The flask was then charged with  $\text{Cs}_2\text{CO}_3$  (97.7 mg, 0.3 mmol, 1.5 eq.), 4'-Bromoacetophenone (39.8 mg, 0.2 mmol, 1.00 eq.), 1H-benzo[d]imidazole-2-thiol (45.0 mg, 0.3 mmol, 1.5 eq.) and 1.5 mL DMSO. The reaction mixture was evacuated and purged with inert gas ( $\text{N}_2$ ) three times. The reaction mixture was then placed into an LED-lined beaker and stirred with an air gas tube for cooling. After stirred for 12 hours, the reaction mixture was washed with water, extracted with EtOAc and concentrated in vacuum. The product was isolated by flash chromatography (1:1 EtOAc:hexanes) as white solid (X = Br, 42 mg, 78%).

**Physical State:** white solid;

$R_f = 0.3$  (silica gel, 1:1 EtOAc:hexanes)

$^1\text{H}$  NMR (300 MHz,  $\text{CDCl}_3$ )  $\delta$  7.69 – 7.65 (m, 2H), 7.50 (dd,  $J = 6.0, 3.0$  Hz, 2H), 7.39 – 7.35 (m, 2H), 7.24 (dd,  $J = 6.0, 3.0$  Hz, 2H), 2.42 (s, 3H).

$^{13}\text{C}$  NMR (75 MHz,  $\text{CDCl}_3$ )  $\delta$  197.1, 145.7, 138.2, 136.0, 130.3, 130.1, 129.1, 128.8, 123.2, 26.5

HRMS (ESI-TOF):  $m/z$  calcd. for  $\text{C}_{15}\text{H}_{12}\text{N}_2\text{OS}$  ( $[\text{M}+\text{H}]^+$ ) 269.0749, found 269.0746.

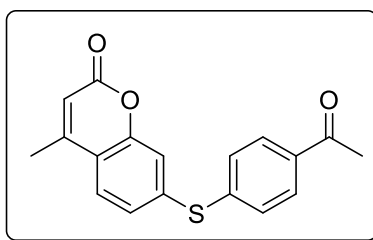

### 7-((4-Acetylphenyl)thio)-4-methyl-2H-chromen-2-one (5h)



A 25 mL storage flask was charged with a stir bar, flame dried under vacuum and back filled with nitrogen three times. The flask was then charged with Cs<sub>2</sub>CO<sub>3</sub> (97.7 mg, 0.3 mmol, 1.5 eq.), 4'-Bromoacetophenone (39.8 mg, 0.2 mmol, 1.00 eq.), 7-mercapto-4-methylcoumarin (57.6 mg, 0.3 mmol, 1.5 eq.) and 1.5 mL DMSO. The reaction mixture was evacuated and purged with inert gas (N<sub>2</sub>) three times. The reaction mixture was then placed into an LED-lined beaker and stirred with an air gas tube for cooling. After stirred for 12 hours, the reaction mixture was washed with water, extracted with EtOAc and concentrated in vacuum. The product was isolated by flash chromatography (1:1 EtOAc:hexanes) as white solid (X = Br, 46 mg, 74%).

**Physical State:** white solid;

*R<sub>f</sub>* = 0.5 (silica gel, 1:1 EtOAc:hexanes)

**<sup>1</sup>H NMR (300 MHz, CDCl<sub>3</sub>)** δ 7.91 (dt, *J* = 8.7, 2.1 Hz, 2H), 7.53 (d, *J* = 8.1 Hz, 1H), 7.44 (dt, *J* = 8.7, 2.1 Hz, 2H), 7.23 (dd, *J* = 8.1, 1.8 Hz, 1H), 7.20 (dd, *J* = 1.8, 0.6 Hz, 1H), 6.25 (q, *J* = 1.2 Hz, 1H), 2.60 (s, 3H), 2.41 (d, *J* = 1.2 Hz, 3H).

**<sup>13</sup>C NMR (75 MHz, CDCl<sub>3</sub>)** δ 197.0, 160.2, 153.9, 151.8, 140.2, 140.1, 136.3, 131.2, 129.3, 125.9, 125.2, 118.9, 118.1, 115.0, 26.6, 18.6

**HRMS (ESI-TOF):** *m/z* calcd. for C<sub>18</sub>H<sub>14</sub>O<sub>3</sub>S ([M+H]<sup>+</sup>) 311.0742, found 311.0735.

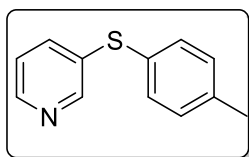

### 3-(*p*-Tolylthio)pyridine (5i)<sup>25</sup>

A 25 mL storage flask was charged with a stir bar, flame dried under vacuum and back filled with nitrogen three times. The flask was then charged with Cs<sub>2</sub>CO<sub>3</sub> (97.7 mg, 0.3 mmol, 1.5 eq.), 3-iodopyridine (40.8 mg, 0.2 mmol, 1.00 eq.), *p*-Toluenethiol (37.3 mg, 0.3 mmol, 1.5 eq.) and 1.5 mL DMSO. The reaction mixture was evacuated and purged with inert gas (N<sub>2</sub>) three times. The reaction mixture was then placed into an LED-lined beaker and stirred with an air gas tube for cooling. After stirred for 23 hours, the reaction mixture was washed with water, extracted with EtOAc and concentrated in vacuum. The product was isolated by flash chromatography (1:2 EtOAc:hexanes) as yellow oil (X = Br, 28 mg, 70%, X = I, 38 mg, 92%, X = Cl, 36 mg, 90%).

**Physical State:** yellow oil;

$R_f = 0.4$  (silica gel, 1:2=EtOAc:hexanes).

$^1\text{H NMR}$  (300 MHz,  $\text{CDCl}_3$ )  $\delta$  8.50 (d,  $J = 1.8$  Hz, 1H), 8.41 (dd,  $J = 4.8, 1.2$  Hz, 1H), 7.53 – 7.49 (m, 1H), 7.34 – 7.30 (m, 2H), 7.19 – 7.14 (m, 3H), 2.35 (s, 3H)

$^{13}\text{C NMR}$  (75 MHz,  $\text{CDCl}_3$ )  $\delta$  150.1, 147.3, 138.4, 136.8, 132.8, 130.3, 129.6, 123.8, 21.2

**HRMS (ESI-TOF):**  $m/z$  calcd. for  $\text{C}_{12}\text{H}_{11}\text{NS}$  ( $[\text{M}+\text{H}]^+$ ) 202.0690, found 202.0696.

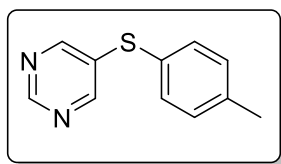

### 5-(*p*-Tolylthio)pyrimidine (5j)<sup>26</sup>

A 25 mL storage flask was charged with a stir bar, flame dried under vacuum and back filled with nitrogen three times. The flask was then charged with  $\text{Cs}_2\text{CO}_3$  (97.7 mg, 0.3 mmol, 1.5 eq.), 5-bromopyrimidine (31.6 mg, 0.2 mmol, 1.00 eq.), *p*-Toluenethiol (37.3 mg, 0.3 mmol, 1.5 eq.) and 1.5 mL DMSO. The reaction mixture was evacuated and purged with inert gas ( $\text{N}_2$ ) three times. The reaction mixture was then placed into an LED-lined beaker and stirred with an air gas tube for cooling. After stirred for 12 hours, the reaction mixture was washed with water, extracted with EtOAc and concentrated in vacuum. The product was isolated by flash chromatography (1:1 EtOAc:hexanes) as yellow solid ( $X = \text{Br}$ , 33 mg, 81%).

**Physical State:** yellow solid;

$R_f = 0.7$  (silica gel, 2:1 EtOAc:hexanes).

$^1\text{H NMR}$  (300 MHz,  $\text{CDCl}_3$ )  $\delta$  8.98 (s, 1H), 8.52 (s, 2H), 7.39 – 7.35 (m, 2H), 7.22 – 7.19 (m, 2H), 2.37 (s, 3H)

$^{13}\text{C NMR}$  (75 MHz,  $\text{CDCl}_3$ )  $\delta$  156.1, 155.8, 139.4, 133.5, 130.7, 127.4, 21.2

**HRMS (ESI-TOF):**  $m/z$  calcd. for  $\text{C}_{11}\text{H}_{10}\text{N}_2\text{S}$  ( $[\text{M}+\text{H}]^+$ ) 203.0643, found 203.0646.

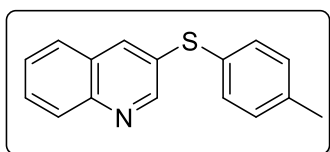

### 3-(*p*-Tolylthio)quinolone (5k)<sup>27</sup>

A 25 mL storage flask was charged with a stir bar, flame dried under vacuum and back filled with nitrogen three times. The flask was then charged with Cs<sub>2</sub>CO<sub>3</sub> (97.7 mg, 0.3 mmol, 1.5 eq.), 6-bromoquinoline (41.6 mg, 0.2 mmol, 1.00 eq.), *p*-Toluenethiol (37.3 mg, 0.3 mmol, 1.5 eq.) and 1.5 mL DMSO. The reaction mixture was evacuated and purged with inert gas (N<sub>2</sub>) three times. The reaction mixture was then placed into an LED-lined beaker and stirred with an air gas tube for cooling. After stirred for 13 hours, the reaction mixture was washed with water, extracted with EtOAc and concentrated in vacuum. The product was isolated by flash chromatography (1:5 EtOAc:hexanes) as colorless oil (X = Br, 52 mg, 92%).

**Physical State:** yellow oil;

*R<sub>f</sub>* = 0.3 (silica gel, 1:5 EtOAc:hexanes)

<sup>1</sup>H NMR (300 MHz, CDCl<sub>3</sub>) δ 8.80 (d, *J* = 2.4 Hz, 1H), 8.10 – 8.06 (m, 1H), 7.99 (dd, *J* = 2.1, 0.6 Hz, 1H), 7.72 – 7.66 (m, 2H), 7.57 – 7.51 (m, 1H), 7.39 – 7.35 (m, 2H), 7.21 – 7.17 (m, 2H), 2.39 (s, 3H).

<sup>13</sup>C NMR (75 MHz, CDCl<sub>3</sub>) δ 151.5, 146.5, 138.3, 135.6, 132.4, 131.3, 130.4, 129.9, 129.3, 129.2, 128.2, 127.2, 127.1, 21.2

**HRMS (ESI-TOF):** *m/z* calcd. for C<sub>16</sub>H<sub>13</sub>NS ([M+H]<sup>+</sup>) 252.0847, found 252.0849.

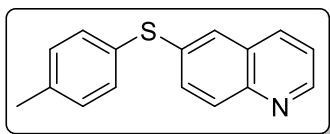

#### 6-(*p*-Tolylthio)quinolone (51)<sup>28</sup>

A 25 mL storage flask was charged with a stir bar, flame dried under vacuum and back filled with nitrogen three times. The flask was then charged with Cs<sub>2</sub>CO<sub>3</sub> (97.7 mg, 0.3 mmol, 1.5 eq.), 3-bromoquinoline (41.6 mg, 0.2 mmol, 1.00 eq.), *p*-Toluenethiol (37.3 mg, 0.3 mmol, 1.5 eq.) and 1.5 mL DMSO. The reaction mixture was evacuated and purged with inert gas (N<sub>2</sub>) three times. The reaction mixture was then placed into an LED-lined beaker and stirred with an air gas tube for cooling. After stirred for 12 hours, the reaction mixture was washed with water, extracted with EtOAc and concentrated in vacuum. The product was isolated by flash chromatography (1:5 EtOAc:hexanes) as yellow oil (X = Br, 46 mg, 91%).

**Physical State:** yellow oil;

*R<sub>f</sub>* = 0.3 (silica gel, 1:5 EtOAc:hexanes).

<sup>1</sup>H NMR (300 MHz, CDCl<sub>3</sub>) δ 8.84 (dd, *J* = 4.2, 1.5 Hz, 1H), 8.00 – 7.96 (m, 1H),

7.60 (d,  $J = 2.1$  Hz, 1H), 7.54 (dd,  $J = 8.7, 2.1$  Hz, 1H), 7.37 – 7.33 (m, 2H), 7.37 – 7.32 (m, 1H), 7.21 – 7.17 (m, 2H), 2.38 (s, 3H).

$^{13}\text{C}$  NMR (75 MHz,  $\text{CDCl}_3$ )  $\delta$  150.1, 147.0, 138.4, 136.5, 135.1, 133.1, 130.6, 130.3, 130.1, 130.0, 128.7, 126.5, 121.6, 21.2

HRMS (ESI-TOF):  $m/z$  calcd. for  $\text{C}_{16}\text{H}_{13}\text{NS}$  ( $[\text{M}+\text{H}]^+$ ) 252.0847, found 252.0851.

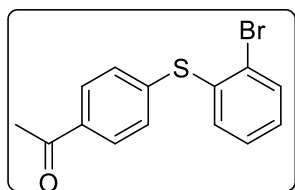

### 1-(4-((2-Bromophenyl)thio)phenyl)ethan-1-one (6)<sup>29</sup>

A 25 mL storage flask was charged with a stir bar, flame dried under vacuum and back filled with nitrogen three times. The flask was then charged with  $\text{Cs}_2\text{CO}_3$  (97.7 mg, 0.3 mmol, 1.5 eq.), 4'-Bromoacetophenone (39.8 mg, 0.2 mmol, 1.00 eq.), 2-bromobenzenethiol (37.8 mg, 0.3 mmol, 1.5 eq.) and 1.5 mL DMSO. The reaction mixture was evacuated and purged with inert gas ( $\text{N}_2$ ) three times. The reaction mixture was then placed into an LED-lined beaker and stirred with an air gas tube for cooling. After stirred for 1.5 hours, the reaction mixture was washed with water, extracted with EtOAc and concentrated in vacuum. The product was isolated by flash chromatography (1:5 EtOAc:hexanes) as white solid ( $\text{X} = \text{Br}$ , 52 mg, 84%).

**Physical State:** white solid;

$R_f = 0.5$  (silica gel, 1:4 EtOAc:hexanes)

$^1\text{H}$  NMR (300 MHz,  $\text{CDCl}_3$ )  $\delta$  7.92 – 7.87 (m, 2H), 7.71 – 7.68 (m, 1H), 7.42 – 7.38 (m, 1H), 7.34 – 7.28 (m, 3H), 7.26 – 7.12 (m, 1H), 2.59 (s, 3H)

$^{13}\text{C}$  NMR (75 MHz,  $\text{CDCl}_3$ )  $\delta$  197.1, 142.0 135.3, 134.5, 134.3, 133.7, 129.7, 129.1 129.0, 128.3, 127.4, 26.5

HRMS (ESI-TOF):  $m/z$  calcd. for  $\text{C}_{14}\text{H}_{11}\text{BrOS}$  ( $[\text{M}+\text{H}]^+$ ) 308.9772, found 308.9766.

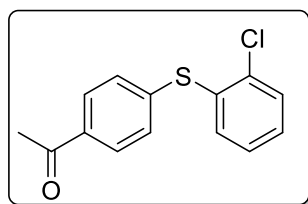

### 1-(4-((2-Chlorophenyl)thio)phenyl)ethan-1-one (7)<sup>29</sup>

A 25 mL storage flask was charged with a stir bar, flame dried under vacuum and back filled with nitrogen three times. The flask was then charged with Cs<sub>2</sub>CO<sub>3</sub> (97.7 mg, 0.3 mmol, 1.5 eq.), 4'-Bromoacetophenone (39.8 mg, 0.2 mmol, 1.00 eq.), 2-bromobenzenethiol (37.8 mg, 0.3 mmol, 1.5 eq.) and 1.5 mL DMSO. The reaction mixture was evacuated and purged with inert gas (N<sub>2</sub>) three times. The reaction mixture was then placed into an LED-lined beaker and stirred with an air gas tube for cooling. After stirred for 1.5 hours, the reaction mixture was washed with water, extracted with EtOAc and concentrated in vacuum. The product was isolated by flash chromatography (1:5 EtOAc:hexanes) as white solid (X = Br, 49 mg, 93%).

**Physical State:** white solid;

*R<sub>f</sub>* = 0.5 (silica gel, 1:4 EtOAc:hexanes)

<sup>1</sup>H NMR (300 MHz, CDCl<sub>3</sub>) δ 7.89 – 7.84 (m, 2H), 7.51 – 7.48 (m, 1H), 7.42 – 7.39 (m, 1H), 7.34 – 7.29 (m, 1H), 7.29 – 7.22 (m, 3H), 2.57 (s, 3H)

<sup>13</sup>C NMR (75 MHz, CDCl<sub>3</sub>) δ 197.1, 142.0, 137.0, 135.2, 134.6, 132.2, 130.4, 129.7, 129.1, 128.8, 127.6, 26.5

**HRMS (ESI-TOF):** m/z calcd. for C<sub>14</sub>H<sub>11</sub>ClOS ([M+H]<sup>+</sup>) 263.0297, found 263.0299.

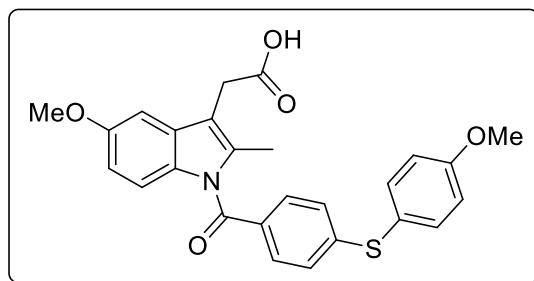

**2-(5-Methoxy-1-(4-((4-methoxyphenyl)thio)benzoyl)-2-methyl-1H-indol-3-yl)acetic acid (8)**

A 25 mL storage flask was charged with a stir bar, flame dried under vacuum and back filled with nitrogen three times. The flask was then charged with Cs<sub>2</sub>CO<sub>3</sub> (130.3 mg, 0.4 mmol, 2.0 eq.), Indometacin (71.6 mg, 0.2 mmol, 1.00 eq.), 4-methoxybenzenethiol (42.0 mg, 0.3 mmol, 1.5 eq.) and 1.5 mL DMSO. The reaction mixture was evacuated and purged with inert gas (N<sub>2</sub>) three times. The reaction mixture was then placed into an LED-lined beaker and stirred with an air gas tube for cooling. After stirred for 20 hours, the reaction mixture was washed with water, extracted with EtOAc and concentrated in vacuum. The product was isolated by flash chromatography (10:1 DCM:MeOH) as yellow solid (X = Cl, 70 mg, 76%).

**Physical State:** yellow solid;

$R_f = 0.5$  (silica gel, 10:1 DCM:MeOH)

$^1\text{H NMR}$  (300 MHz,  $\text{CDCl}_3$ )  $\delta$  7.56 – 7.48 (m, 4H), 7.11 (dd,  $J = 6.6$  Hz, 1.8 Hz, 2H), 6.98 – 6.90 (m, 4H), 6.67 (dd,  $J = 9.0$ , 2.7 Hz, 1H), 3.85 (s, 3H), 3.82 (s, 3H), 3.68 (s, 2H), 2.37 (s, 3H).

$^{13}\text{C NMR}$  (75 MHz,  $\text{CDCl}_3$ )  $\delta$  177.0, 168.8, 160.8, 155.9, 147.1, 136.9, 136.3, 131.6, 131.0, 130.5, 130.3, 125.8, 121.0, 115.5, 115.0, 111.6, 111.2, 101.0, 55.7, 55.4, 30.1, 13.2

HRMS (ESI-TOF):  $m/z$  calcd. for  $\text{C}_{26}\text{H}_{23}\text{NO}_5\text{S}$  ( $[\text{M}+\text{H}]^+$ ) 462.1375, found 462.1365.

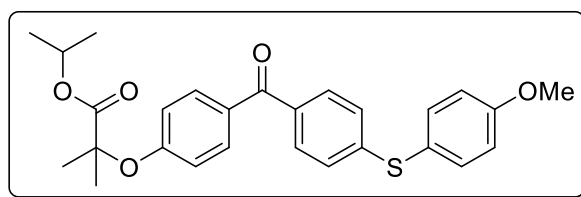

**Isopropyl 2-(4-(4-((4-methoxyphenyl)thio)benzoyl)phenoxy)-2-methylpropanoate (9)**

A 25 mL storage flask was charged with a stir bar, flame dried under vacuum and back filled with nitrogen three times. The flask was then charged with  $\text{Cs}_2\text{CO}_3$  (97.7 mg, 0.3 mmol, 1.5 eq.), Fenofibrate (72.0 mg, 0.2 mmol, 1.00 eq.), 4-methoxybenzenethiol (42.0 mg, 0.3 mmol, 1.5 eq.) and 1.5 mL DMSO. The reaction mixture was evacuated and purged with inert gas ( $\text{N}_2$ ) three times. The reaction mixture was then placed into an LED-lined beaker and stirred with an air gas tube for cooling. After stirred for 22 hours, the reaction mixture was washed with water, extracted with EtOAc and concentrated in vacuum. The product was isolated by flash chromatography (1:5 EtOAc:hexanes) as white solid (X = Cl, 74 mg, 79%).

**Physical State:** white solid;

$R_f = 0.5$  (silica gel, 1:5 EtOAc:hexanes)

$^1\text{H NMR}$  (300 MHz,  $\text{CDCl}_3$ )  $\delta$  7.71 (dt,  $J = 9.0$ , 2.4 Hz, 2H), 7.62 (dt,  $J = 8.7$ , 1.8 Hz, 2H), 7.49 (dt,  $J = 9.0$ , 2.4 Hz, 2H), 7.16 – 7.06 (m, 2H), 7.00 – 6.92 (m, 2H), 6.91 – 6.78 (m, 2H), 5.12 – 5.04 (m, 1H), 3.85 (s, 3H), 1.65 (s, 6H), 1.20 (s, 3H), 1.18 (s, 3H).

$^{13}\text{C NMR}$  (75 MHz,  $\text{CDCl}_3$ )  $\delta$  194.5, 173.1, 160.6, 159.4, 145.4, 136.7, 134.7, 131.8, 130.8, 130.4, 125.8, 121.7, 117.2, 115.3, 79.4, 69.3, 55.4, 25.4, 21.5

HRMS (ESI-TOF):  $m/z$  calcd. for  $\text{C}_{27}\text{H}_{28}\text{O}_5\text{S}$  ( $[\text{M}+\text{H}]^+$ ) 465.1736, found 465.1722.

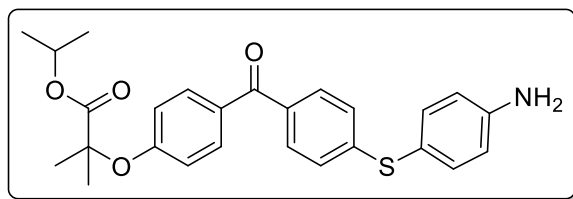

**Isopropyl 2-(4-(4-((4-aminophenyl)thio)benzoyl)phenoxy)-2-methylpropanoate (10)**

A 25 mL storage flask was charged with a stir bar, flame dried under vacuum and back filled with nitrogen three times. The flask was then charged with Cs<sub>2</sub>CO<sub>3</sub> (130.3 mg, 0.4 mmol, 2.0 eq.), Fenofibrate (72.0 mg, 0.2 mmol, 1.00 eq.), 4-aminobenzenethiol (37.5 mg, 0.3 mmol, 1.5 eq.) and 1.5 mL DMSO. The reaction mixture was evacuated and purged with inert gas (N<sub>2</sub>) three times. The reaction mixture was then placed into an LED-lined beaker and stirred with an air gas tube for cooling. After stirred for 22 hours, the reaction mixture was washed with water, extracted with EtOAc and concentrated in vacuum. The product was isolated by flash chromatography (1:3 EtOAc:hexanes) as yellow solid (X = Cl, 70 mg, 79%).

**Physical State:** yellow solid;

*R<sub>f</sub>* = 0.5 (silica gel, 1:2 EtOAc:hexanes)

<sup>1</sup>H NMR (300 MHz, CDCl<sub>3</sub>) δ 7.73 – 7.68 (m, 2H), 7.62 – 7.58 (m, 2H), 7.37 – 7.32 (m, 2H), 7.12 – 7.08 (m, 2H), 6.85 – 6.82 (m, 2H), 6.73 – 6.69 (m, 2H), 5.12 – 5.03 (m, 1H), 3.92 (s, 2H), 1.64 (s, 6H), 1.20 (s, 3H), 1.18 (s, 3H).

<sup>13</sup>C NMR (75 MHz, CDCl<sub>3</sub>) δ 194.6, 173.2, 159.3, 147.9, 146.5, 137.0, 134.3, 131.8, 130.9, 130.4, 125.2, 117.9, 117.2, 116.0, 79.4, 69.3, 25.4, 21.5

**HRMS (ESI-TOF):** m/z calcd. for C<sub>26</sub>H<sub>27</sub>NO<sub>4</sub>S ([M+H]<sup>+</sup>) 450.1739, found 450.1750.

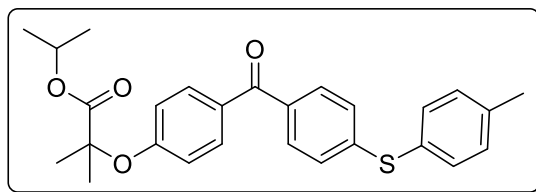

**Isopropyl 2-methyl-2-(4-(4-(p-tolylthio)benzoyl)phenoxy)propanoate (11)**

A 25 mL storage flask was charged with a stir bar, flame dried under vacuum and back filled with nitrogen three times. The flask was then charged with Cs<sub>2</sub>CO<sub>3</sub> (97.7 mg, 0.3 mmol, 1.5 eq.), Fenofibrate (72.0 mg, 0.2 mmol, 1.00 eq.), *p*-Toluenethiol (37.3 mg, 0.3 mmol, 1.5 eq.) and 1.5 mL DMSO. The reaction mixture was evacuated and purged with inert gas (N<sub>2</sub>) three times. The reaction mixture was then placed into an LED-lined beaker and stirred with an air gas tube for cooling. After stirred for 22 hours, the reaction mixture was washed with water, extracted with EtOAc and concentrated in vacuum. The product was isolated by flash chromatography (1:6

EtOAc:hexanes) as white solid (X = Cl, 57 mg, 60%).

**Physical State:** white solid;

$R_f$  = 0.5 (silica gel, 1:6 EtOAc:hexanes)

**$^1\text{H}$  NMR (300 MHz,  $\text{CDCl}_3$ )**  $\delta$  7.74 – 7.69 (m, 2H), 7.64 – 7.60 (m, 2H), 7.44 – 7.40 (m, 2H), 7.24 – 7.16 (m, 4H), 6.86 – 6.83 (m, 2H), 5.12 – 5.04 (m, 1H), 2.39 (s, 3H), 1.65 (s, 6H), 1.21 (s, 3H), 1.18 (s, 3H).

**$^{13}\text{C}$  NMR (75 MHz,  $\text{CDCl}_3$ )**  $\delta$  194.6, 173.1, 159.4, 144.4, 139.2, 135.0, 134.3, 131.8, 130.7, 130.5, 130.4, 128.3, 126.7, 117.2, 79.4, 69.3, 25.4, 21.5, 21.3

**HRMS (ESI-TOF):**  $m/z$  calcd. for  $\text{C}_{27}\text{H}_{28}\text{O}_4\text{S}$  ( $[\text{M}+\text{H}]^+$ ) 449.1786, found 449.1775.

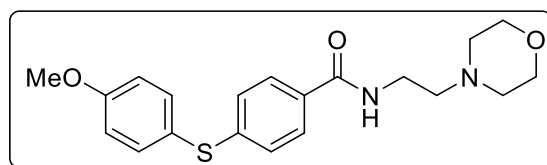

#### 4-((4-Methoxyphenyl)thio)-N-(2-morpholinoethyl)benzamide (12)

A 25 mL storage flask was charged with a stir bar, flame dried under vacuum and back filled with nitrogen three times. The flask was then charged with  $\text{Cs}_2\text{CO}_3$  (97.7 mg, 0.3 mmol, 1.5 eq.), Moclobemide (53.7 mg, 0.2 mmol, 1.00 eq.), 4-methoxybenzenethiol (42.0 mg, 0.3 mmol, 1.5 eq.) and 1.5 mL DMSO. The reaction mixture was evacuated and purged with inert gas ( $\text{N}_2$ ) three times. The reaction mixture was then placed into an LED-lined beaker and stirred with an air gas tube for cooling. After stirred for 26 hours, the reaction mixture was washed with water, extracted with EtOAc and concentrated in vacuum. The product was isolated by flash chromatography (10:1 DCM:MeOH) as white solid (X = Cl, 41 mg, 50%).

**Physical State:** white solid;

$R_f$  = 0.5 (silica gel, 10:1 DCM:MeOH)

**$^1\text{H}$  NMR (300 MHz,  $\text{CDCl}_3$ )**  $\delta$  7.63 (dd,  $J$  = 6.9, 2.1 Hz, 2H), 7.48 (dd,  $J$  = 6.9, 2.1 Hz, 2H), 7.14 (dd,  $J$  = 6.9, 2.1 Hz, 2H), 6.96 (dd,  $J$  = 6.9, 2.1 Hz, 2H), 6.73 (s, 1H), 3.87 (s, 3H), 3.73 (t,  $J$  = 4.5 Hz, 4H), 3.55 (dd,  $J$  = 11.4, 5.4 Hz, 2H), 2.60 (t,  $J$  = 6.0 Hz, 2H), 2.51 (t,  $J$  = 4.5 Hz, 4H).

**$^{13}\text{C}$  NMR (75 MHz,  $\text{CDCl}_3$ )**  $\delta$  166.8, 160.5, 144.1, 136.5, 131.3, 127.4, 126.5, 122.2, 115.3, 66.9, 56.9, 55.4, 53.3, 35.9

**HRMS (ESI-TOF):**  $m/z$  calcd. for  $\text{C}_{20}\text{H}_{24}\text{N}_2\text{O}_3\text{S}$  ( $[\text{M}+\text{H}]^+$ ) 373.1586, found



373.1578.

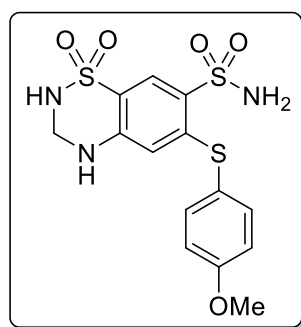

**6-((4-Methoxyphenyl)thio)-3,4-dihydro-2H-benzo[e][1,2,4]thiadiazine-7-sulfonamide 1,1-dioxide (13)**

A 25 mL storage flask was charged with a stir bar, flame dried under vacuum and back filled with nitrogen three times. The flask was then charged with Cs<sub>2</sub>CO<sub>3</sub> (130.3 mg, 0.4 mmol, 2.0 eq.), Hydrochlorothiazide (59.5 mg, 0.2 mmol, 1.00 eq.), 4-methoxybenzenethiol (42.0 mg, 0.3 mmol, 1.5 eq.) and 1.5 mL DMSO. The reaction mixture was evacuated and purged with inert gas (N<sub>2</sub>) three times. The reaction mixture was then placed into an LED-lined beaker and stirred with an air gas tube for cooling. After stirred for 22 hours, the reaction mixture was washed with water, extracted with EtOAc and concentrated in vacuum. The product was isolated by flash chromatography (10:1 EtOAc:hexane) as white solid (X = Cl, 48 mg, 65%).

**Physical State:** white solid;

$R_f$  = 0.5 (silica gel, EtOAc)

**<sup>1</sup>H NMR (300 MHz, *d*<sub>6</sub>-DMSO)** δ 7.92 (s, 1H), 7.72 (t, *J* = 7.8 Hz, 2H), 7.50 (dd, *J* = 6.6, 2.1 Hz, 2H), 7.36 (s, 2H), 7.10 (dd, *J* = 6.6, 2.1 Hz, 2H), 6.12 (s, 1H), 4.56 (dd, *J* = 8.1, 2.4 Hz, 2H), 3.83 (s, 3H).

**<sup>13</sup>C NMR (75 MHz, *d*<sub>6</sub>-DMSO)** δ 161.1, 146.1, 144.6, 137.8, 127.7, 125.2, 121.1, 117.3, 116.33, 113.5, 55.9, 54.6

**HRMS (ESI-TOF):** *m/z* calcd. for C<sub>14</sub>H<sub>15</sub>N<sub>3</sub>O<sub>5</sub>S<sub>3</sub> ([M]<sup>−</sup>) 400.0096, found 400.0099.

## References

1. Ryan, M. D.; Pearson, R. M.; French, T. A.; Miyake, G. M. *Macromolecules* **2017**, *50*, 4616–4622.
2. Zhang, X.; Lu, G.-P.; Cai, C. *Green Chem.* **2016**, *18*, 5580–5585.
3. Prasad, D. J. C.; Naidu, A. B.; Sekar, G. *Tetrahedron Lett.* **2009**, *50*, 1411–1415.
4. Kovács, S.; Novák, Z. *Org. Biomol. Chem.* **2011**, *9*, 711–716.
5. Arisawa, M.; Suzuki, T.; Ishikawa, T.; Yamaguchi, M. *J. Am. Chem. Soc.* **2008**, *130*, 12214–12215
6. Guan, P.; Cao, C.; Liu, Y.; Li, Y.; He, P.; Chen, Q.; Liu, G.; Shi, Y. *Tetrahedron Lett.* **2012**, *53*, 5987–5992.
7. Gorczynski, M. J.; Leal, R. M.; Mooberry, S. L.; Bushweller, J. H.; Browna, M. L. *Bioorg. Med. Chem.* **2004**, *12*, 1029–1036.
8. Oderinde, M. S.; Frenette, M.; Robbins, D. W.; Aquila, B.; Johannes, J. W. *J. Am. Chem. Soc.* **2016**, *138*, 1760–1763.
9. Bates, C. G. Gujadhur, R. K. Venkataraman, D. *Org. Lett.* **2002**, *4*, 2803–2806.
10. Wong, Y.-C.; Jayanth, T. T.; Cheng, C.-H. *Org. Lett.* **2006**, *8*, 5613–5616.
11. Wu, J.-P.; Saha, A. K.; Haddad, N.; Busacca, C. A.; Lorenz, J. C.; Lee, H.; Senanayake, C. H. *Adv. Synth. Catal.* **2016**, *358*, 1924–1928.
12. Fernandez-Rodriguez, M. A.; Shen, Q. L.; Hartwig, J. F. *Chem. – Eur. J.* **2006**, *12*, 7782–7796.
13. Qiao, Z.; Jiang, X. *Org. Lett.* **2016**, *18*, 1550–1553.
14. Verma, A. K.; Singh, J.; Chaudhary, R. *Tetrahedron Lett.* **2007**, *48*, 7199–7202.
15. Yoshida, S.; Sugimura, Y.; Hazama, Y.; Nishiyama, Y.; Yano, T.; Shimizu, S.; Hosoya, T. *Chem. Commun.* **2015**, *51*, 16613–16616
16. Savarin, C.; Srogl, J.; Liebeskind, L. S. *Org. Lett.* **2002**, *4*, 4309–4312
17. Pawliczek, M.; Garve, L. K. B.; Werz, D. B. *Org. Lett.* **2015**, *17*, 1716–1719
18. Huang, Yao-Bing.; Yang, Chu-Ting.; Yi, Jun.; Deng, Xiao-Jian.; Fu, Yao.; Liu, Lei. *J. Org. Chem.* **2011**, *76*, 800–810.
19. Deng, W.; Zou, Y.; Wang, Y.-F.; Liu, L.; Guo, Q.-X. *Synlett.* **2004**, 1254–1258.
20. Correa, A.; Carril, M.; Bolm, C. *Angew. Chem. Int. Ed.* **2008**, *47*, 2880–2883.
21. Eichman, C. C.; Stambuli, J. P. *J. Org. Chem.* **2009**, *74*, 4005–4008.
22. Wang, T. T.; Yang, F. L.; Tian, S. K. *Adv. Synth. Catal.* **2015**, *357*, 928–932.
23. Gendre, F.; Yang, M.; Diaz, P. *Org. Lett.* **2005**, *7*, 2719–2722.
24. Bhadra, S.; Sreedhar, B.; Ranua, B. C. *Adv. Synth. Catal.* **2009**, *351*, 2369–2378
25. Thomas, A. M.; Asha, S.; Sindhu, K. S.; Anilkumar, G.; *Tetrahedron Lett.* **2015**, *56*, 6560–6564.
26. Singh, N.; Singh, R.; Raghuvanshi, D. S.; Singh, K. N. *Org. Lett.* **2013**, *15*, 5874–5877.
27. Boateng, C. A.; Zhu, X. Y.; Jacob, M. R.; Khan, S. I.; Walker, L. A.; Ablordeppey, S. Y. *Eur. J. Med. Chem.* **2011**, *46*, 1789–1797.
28. Lin, Y.-M.; Lu, G.-P.; Wang, G.-X.; Yi, W.-B. *Adv. Synth. Catal.* **2016**, *358*, 4100–4105.

29. Yan, X.; Wang, Z.; Cardozo, M.; DeGraffenreid, M.; Di, Y.; Fan, P.; He, X.; Jaen, J. C.; Labelle, M.; Liu, J.; Ma, J.; McMinn, D.; Miao, S.; Sudom, A.; Sun, D.; Tang, L.; Tu, H.; Ursu, S.; Walker, N.; Ye, Q.; Powers, J. P. *Bioorg. Med. Chem. Lett.* **2010**, *20*, 7071–7075.

# $^1\text{H}$ NMR and $^{13}\text{C}$ NMR Spectra of New Compounds

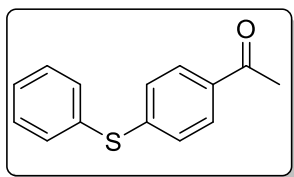

1-(4-(Phenylthio)phenyl)ethan-1-one (3a),  $^1\text{H}$  NMR (300 MHz,  $\text{CDCl}_3$ )

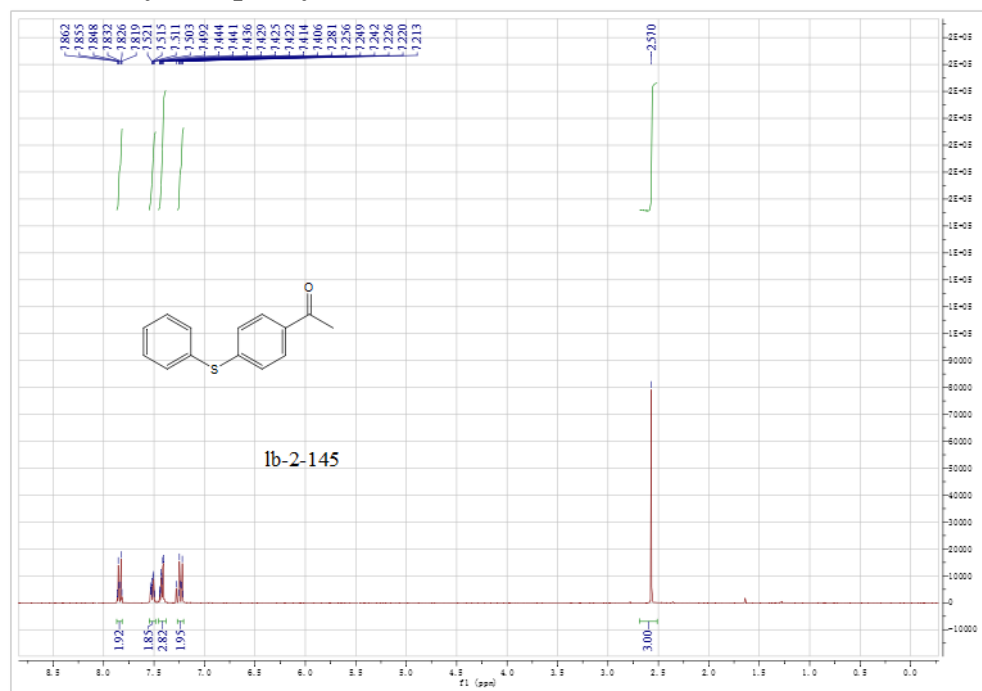

$^{13}\text{C}$  NMR (75 MHz,  $\text{CDCl}_3$ )

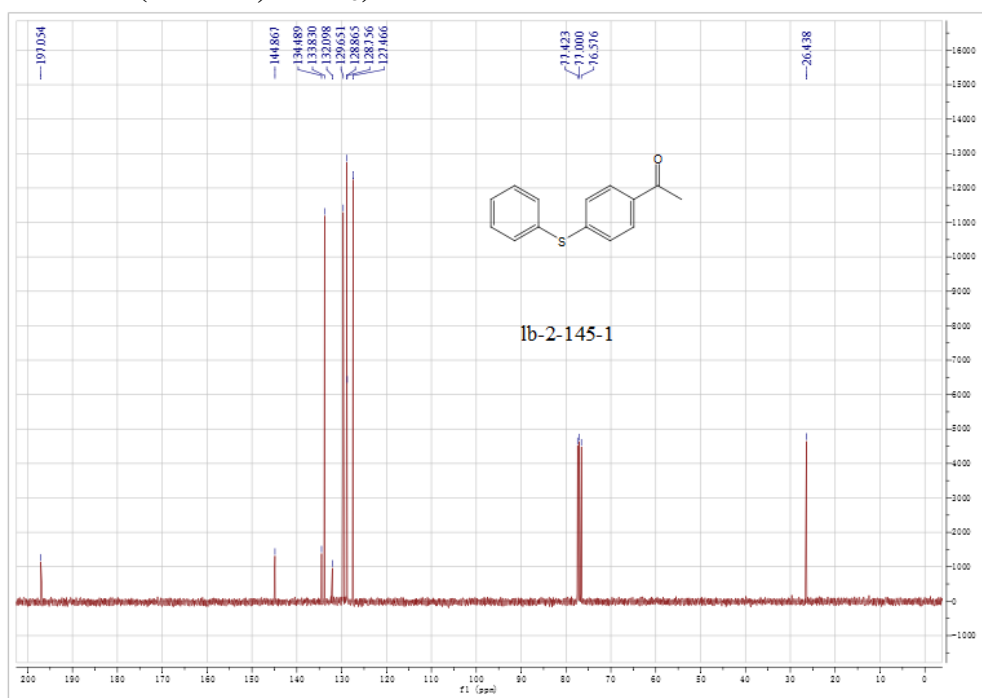

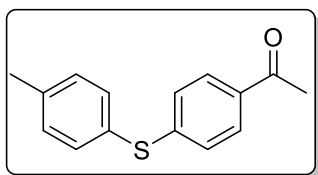

1-(4-(*p*-Tolylthio)phenyl)ethan-1-one (3b),  $^1\text{H}$  NMR (300 MHz,  $\text{CDCl}_3$ )

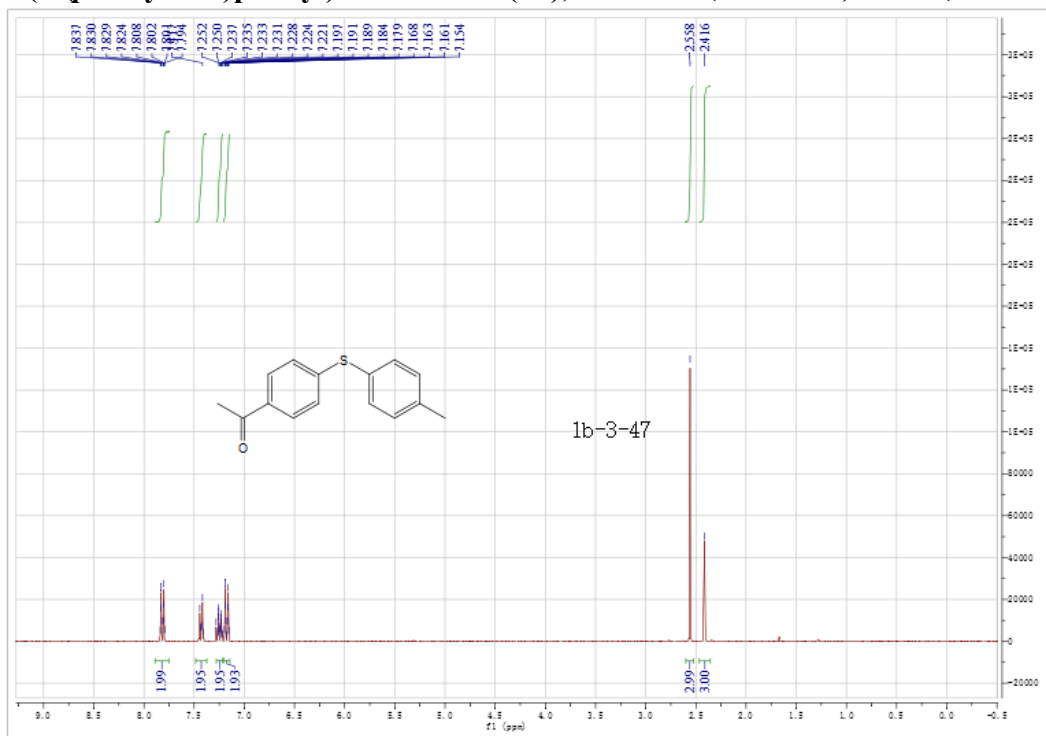

$^{13}\text{C}$  NMR (75 MHz,  $\text{CDCl}_3$ )

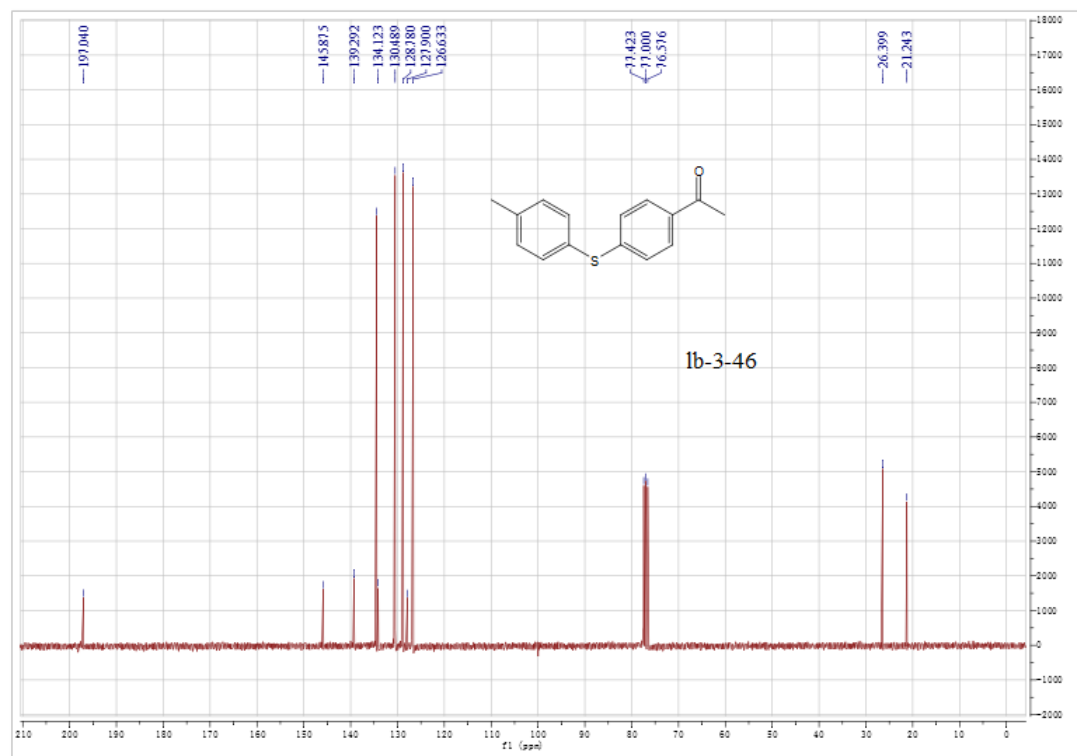

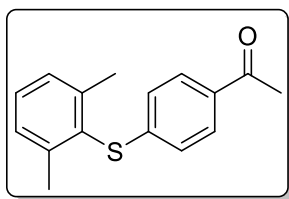

1-(4-((2,6-Dimethylphenyl)thio)phenyl)ethan-1-one (3c),  $^1\text{H}$  NMR (300 MHz,  $\text{CDCl}_3$ )

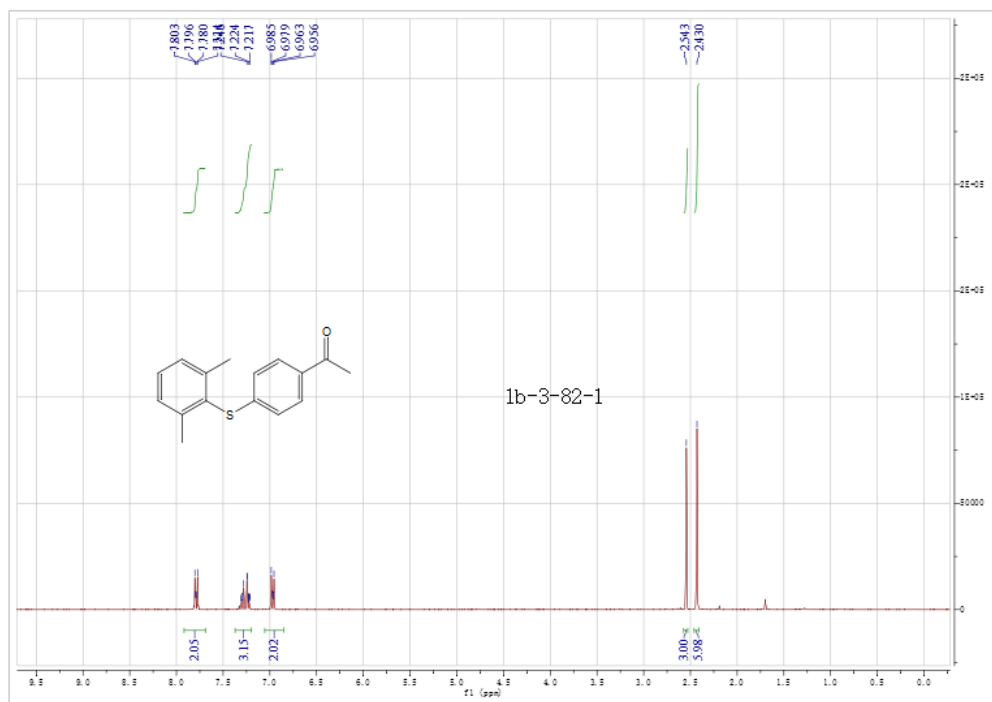

$^{13}\text{C}$  NMR (75 MHz,  $\text{CDCl}_3$ )

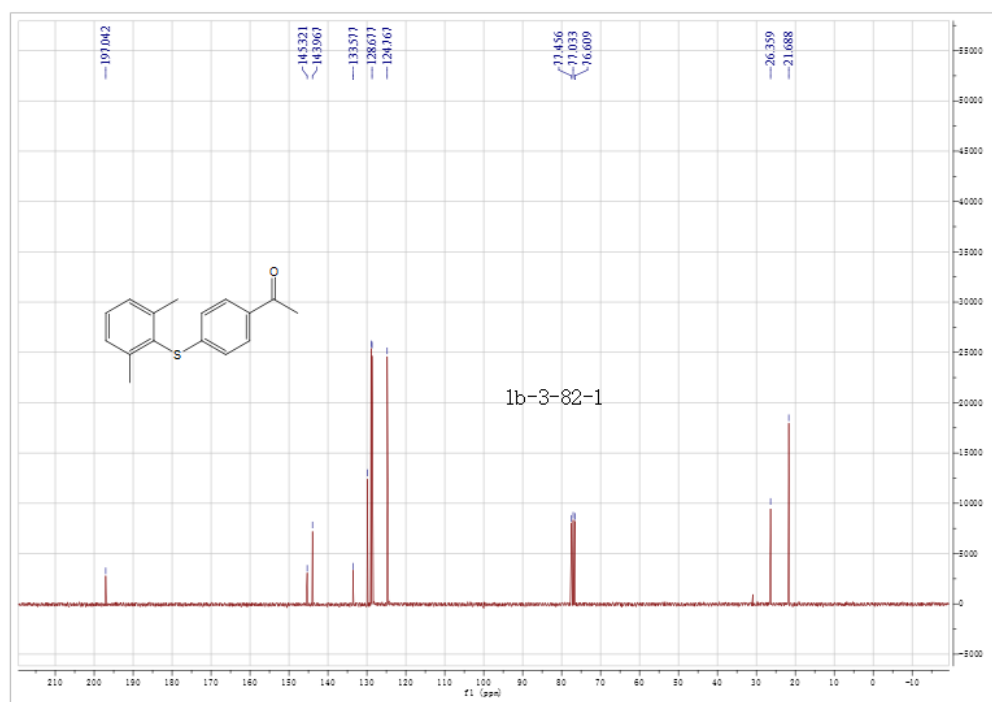

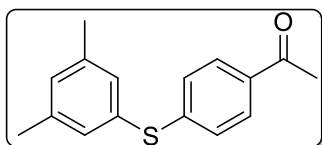

**1-(4-((3,5-Dimethylphenyl)thio)phenyl)ethan-1-one (3d),  $^1\text{H}$  NMR (300 MHz,  $\text{CDCl}_3$ )**

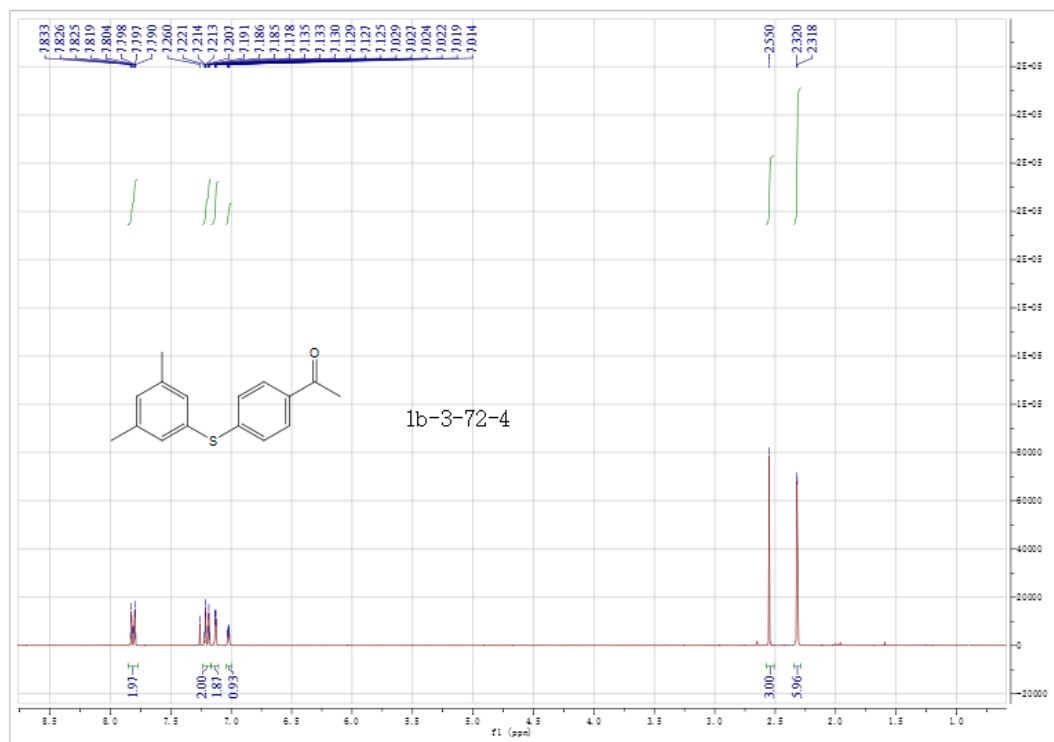

**$^{13}\text{C}$  NMR (75 MHz,  $\text{CDCl}_3$ )**

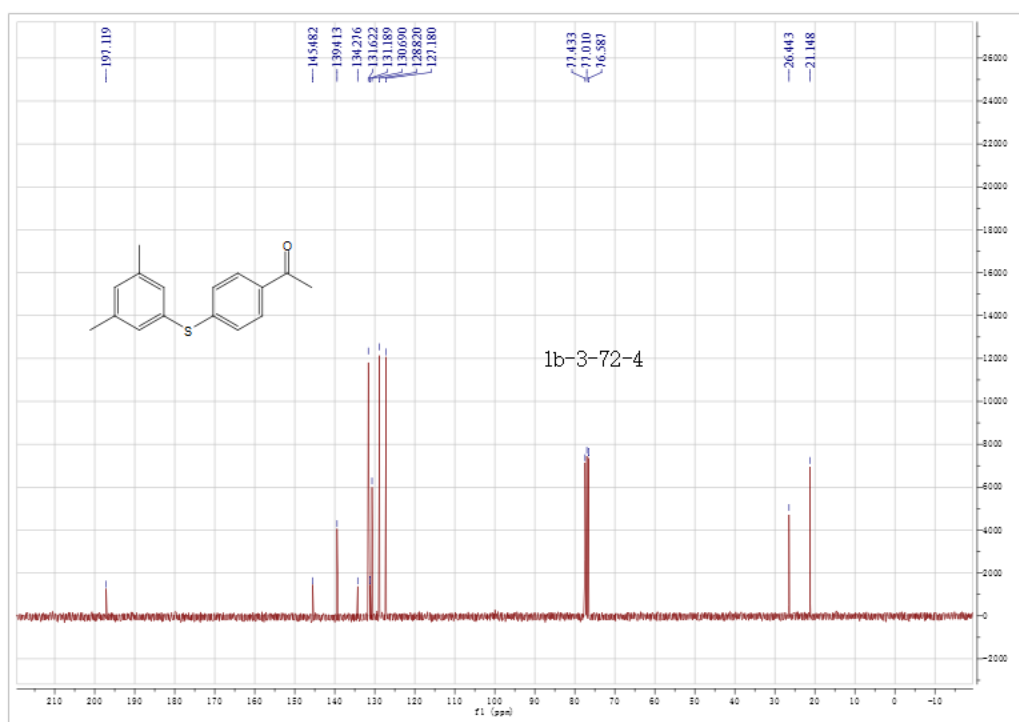

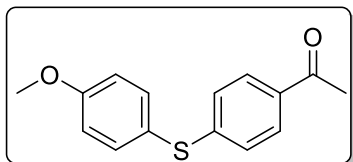

1-(4-((4-Methoxyphenyl)thio)phenyl)ethan-1-one (3e),  $^1\text{H}$  NMR (300 MHz,  $\text{CDCl}_3$ )

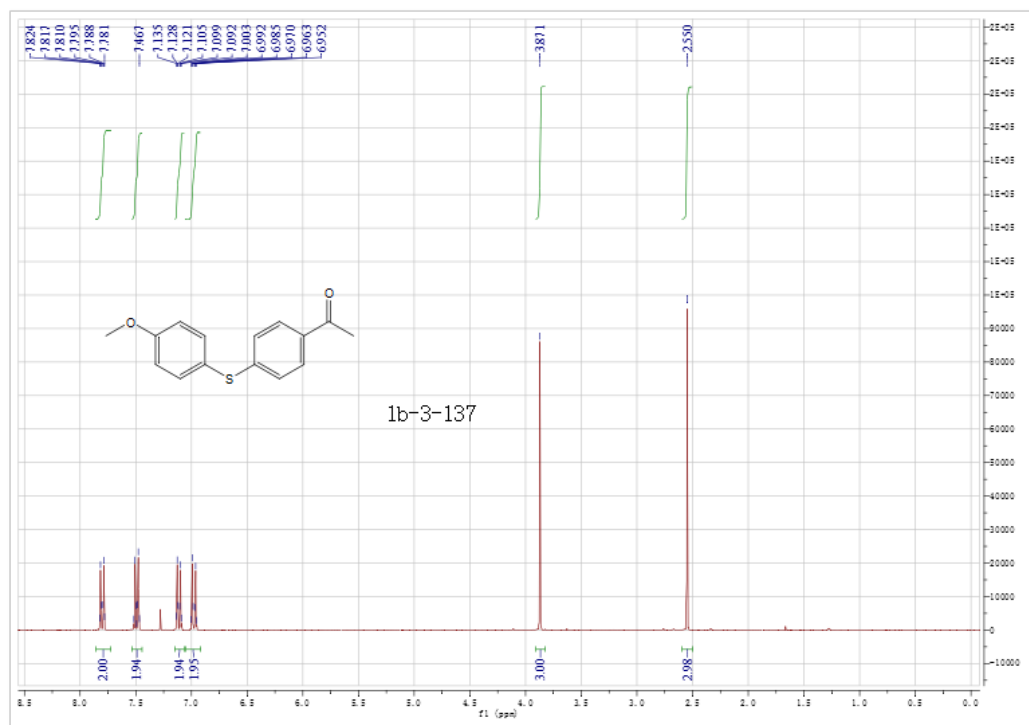

$^{13}\text{C}$  NMR (75 MHz,  $\text{CDCl}_3$ )

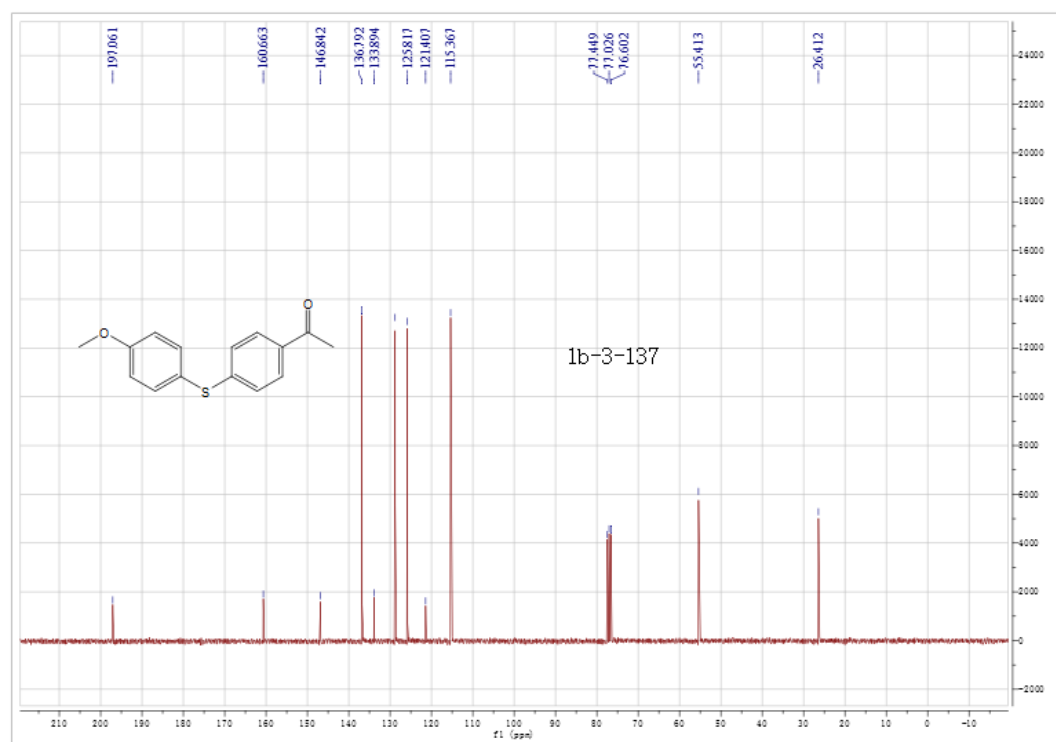



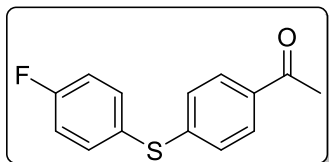

1-(4-((4-Fluorophenyl)thio)phenyl)ethan-1-one (3f),  $^1\text{H}$  NMR (300 MHz,  $\text{CDCl}_3$ )

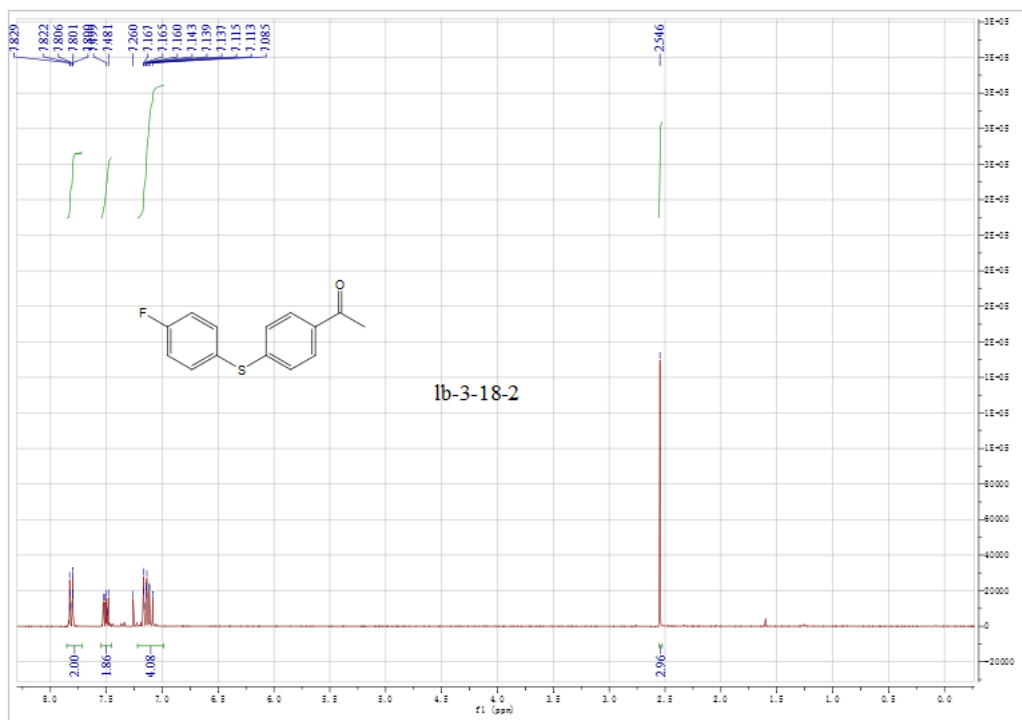

$^{13}\text{C}$  NMR (75 MHz,  $\text{CDCl}_3$ )

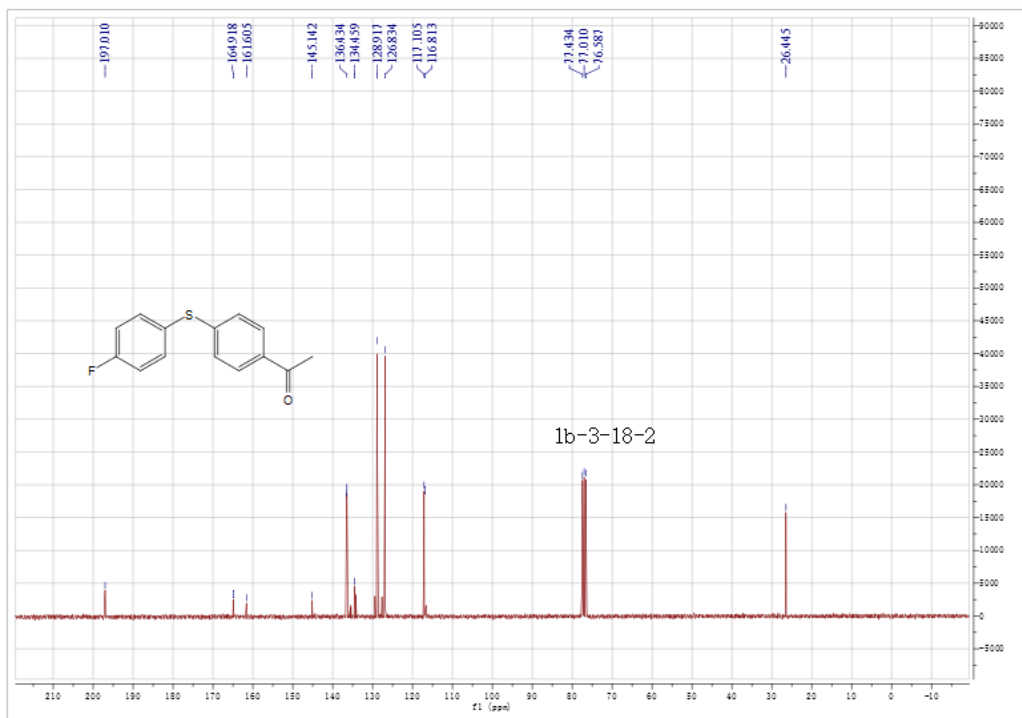

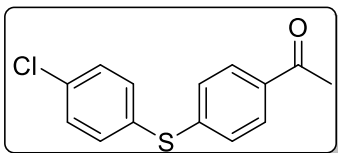

1-(4-((4-Chlorophenyl)thio)phenyl)ethan-1-one (3g),  $^1\text{H}$  NMR (300 MHz,  $\text{CDCl}_3$ )

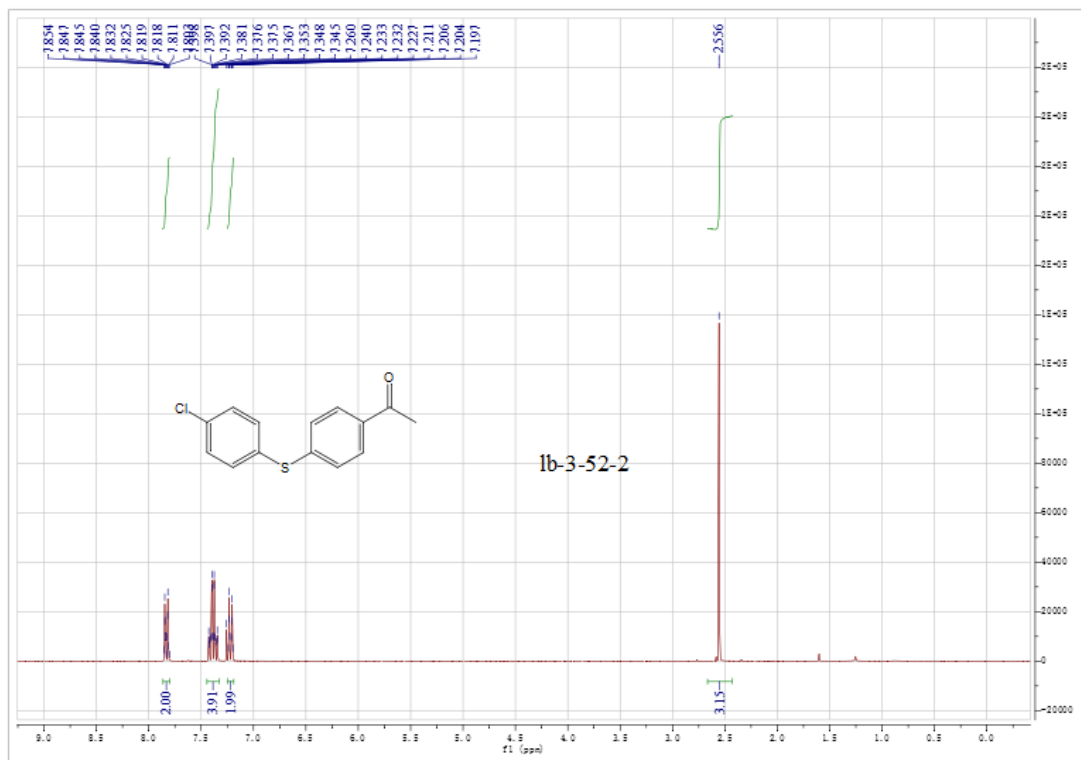

$^{13}\text{C}$  NMR (75 MHz,  $\text{CDCl}_3$ )

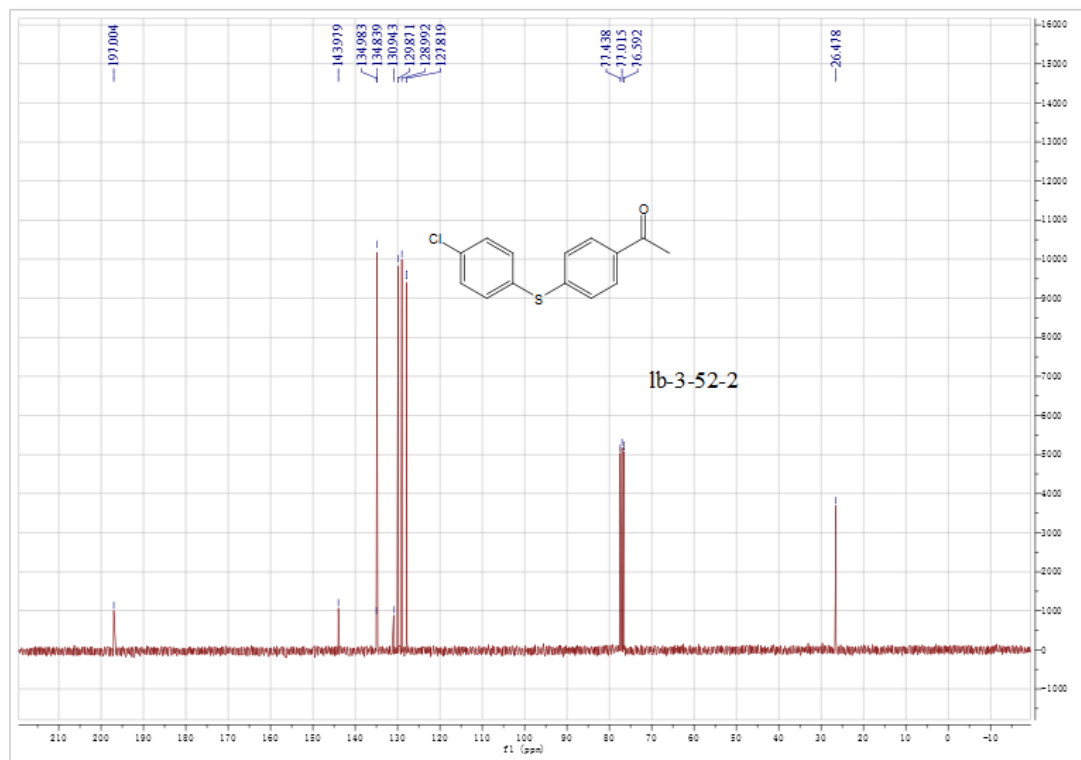

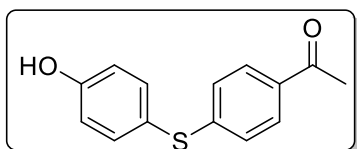

**1-(4-((4-Hydroxyphenyl)thio)phenyl)ethan-1-one (3h),  $^1\text{H}$  NMR (300 MHz,  $d_6$ -DMSO)**

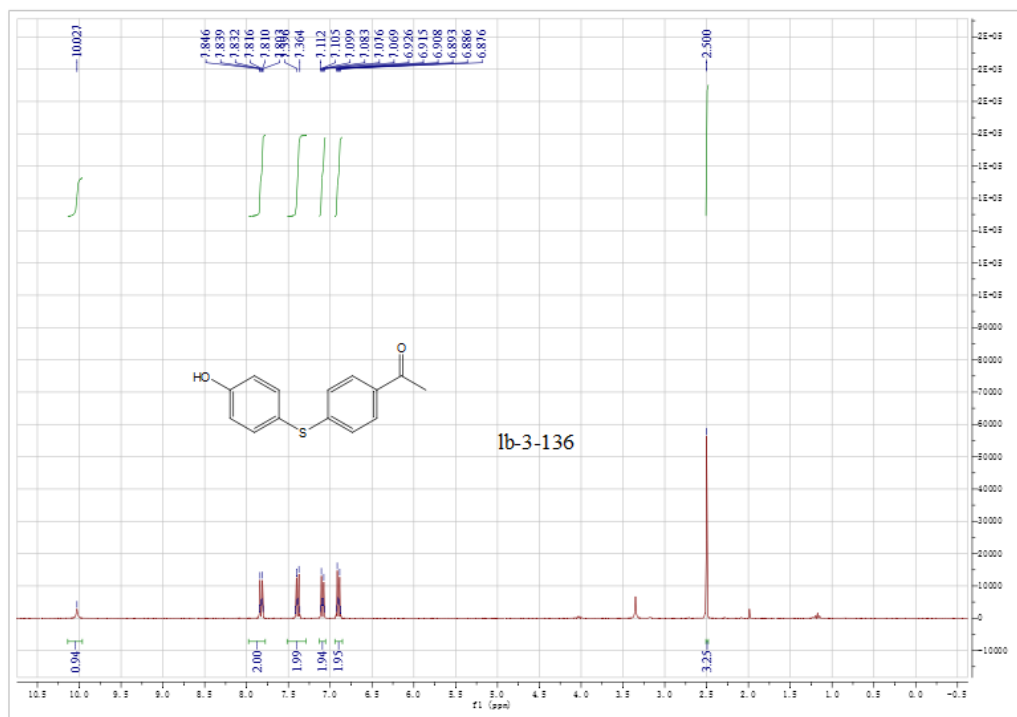

**$^{13}\text{C}$  NMR (75 MHz,  $d_6$ -DMSO)**

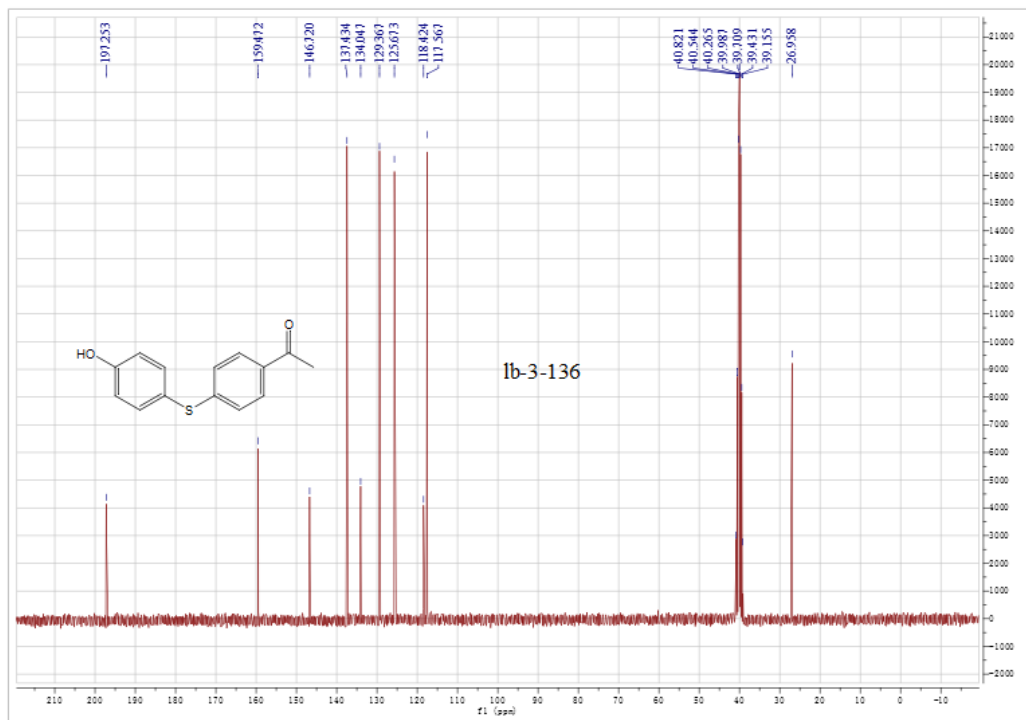

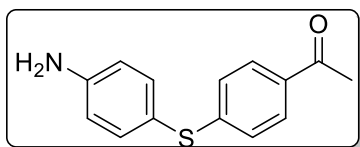

1-(4-((4-Aminophenyl)thio)phenyl)ethan-1-one (3i),  $^1\text{H}$  NMR (300 MHz,  $\text{CDCl}_3$ )

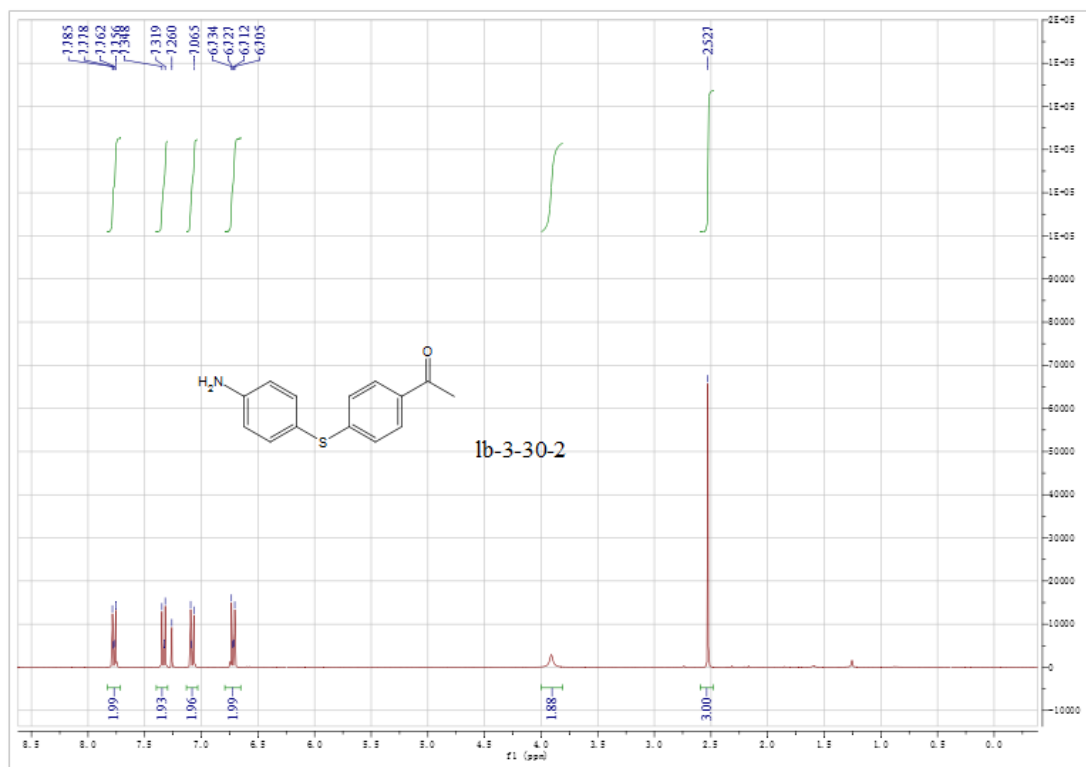

$^{13}\text{C}$  NMR (75 MHz,  $\text{CDCl}_3$ )

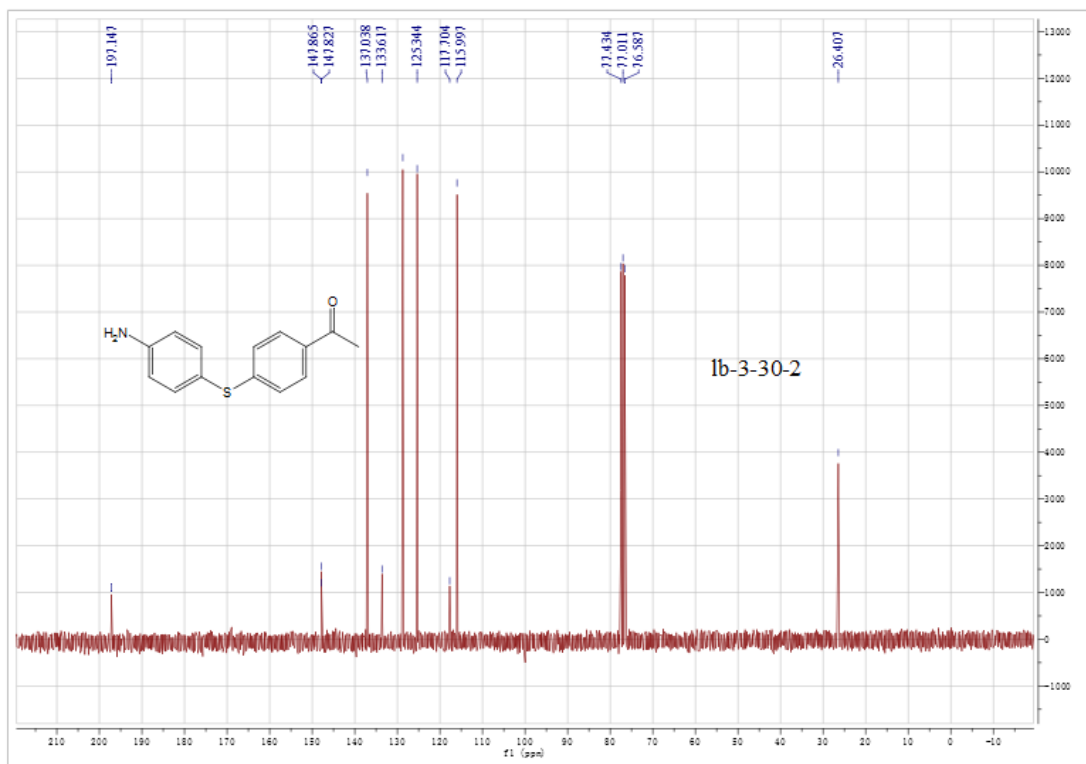

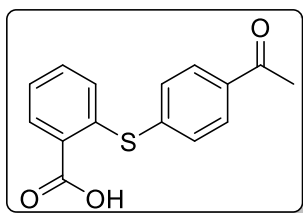

2-((4-Acetylphenyl)thio)benzoic acid (3j),  $^1\text{H}$  NMR (300 MHz,  $d_6$ -DMSO)

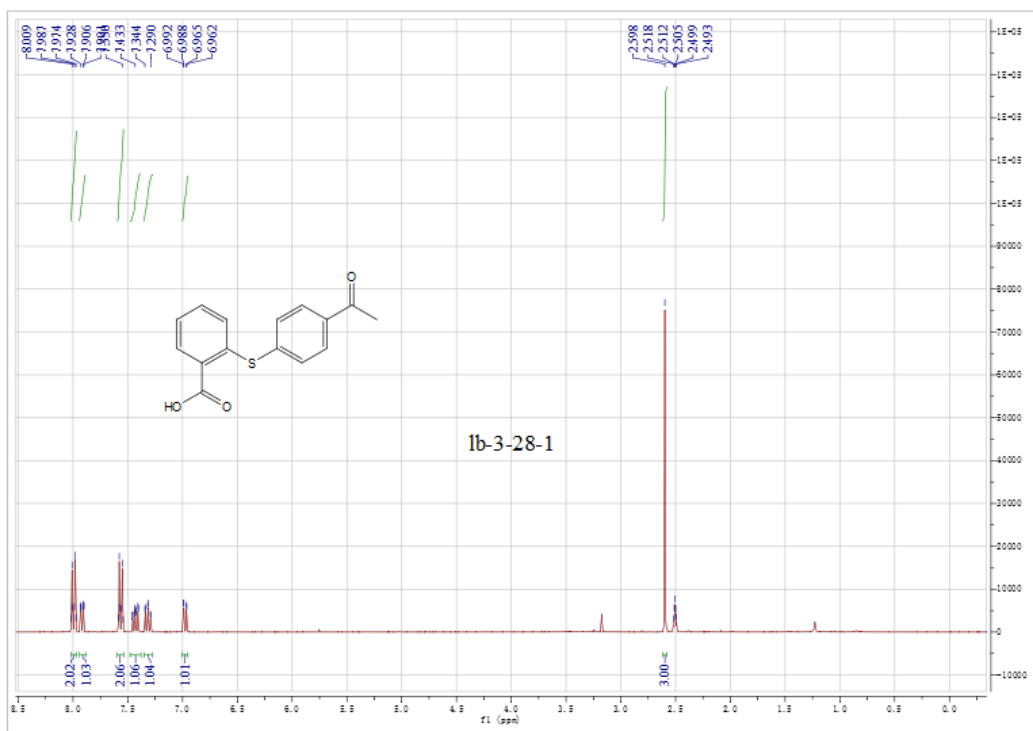

$^{13}\text{C}$  NMR (75 MHz,  $d_6$ -DMSO)

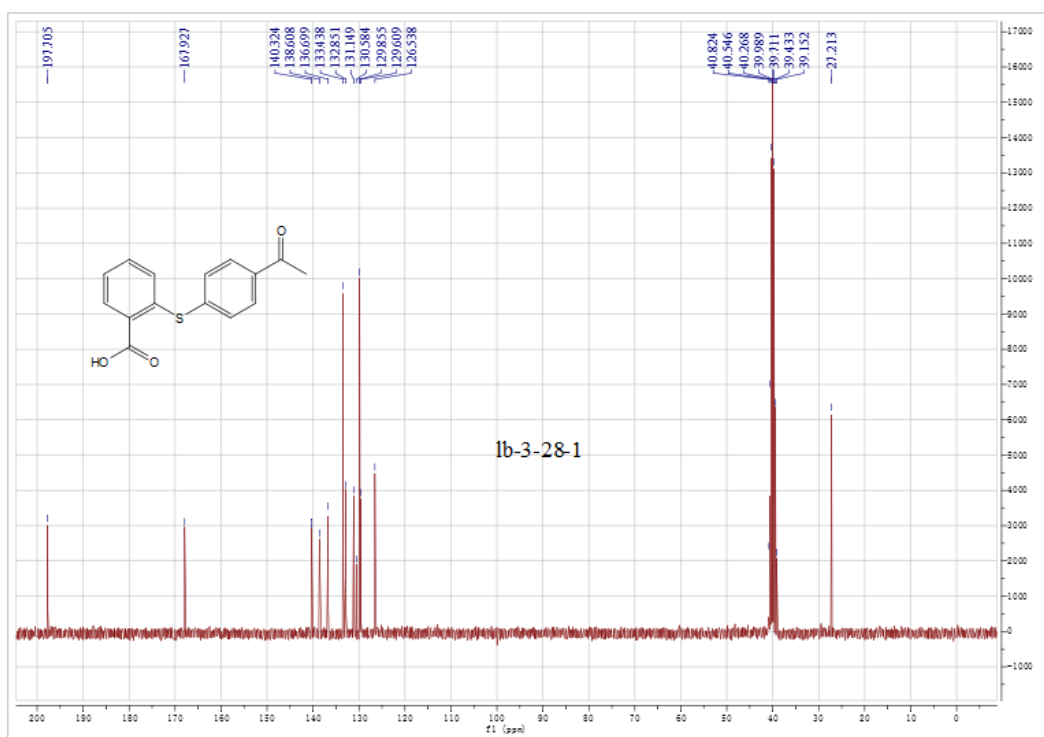

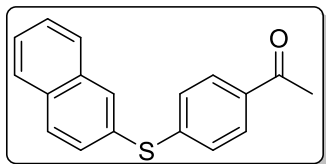

1-(4-(Naphthalen-2-ylthio)phenyl)ethan-1-one (3k),  $^1\text{H}$  NMR (300 MHz,  $\text{CDCl}_3$ )

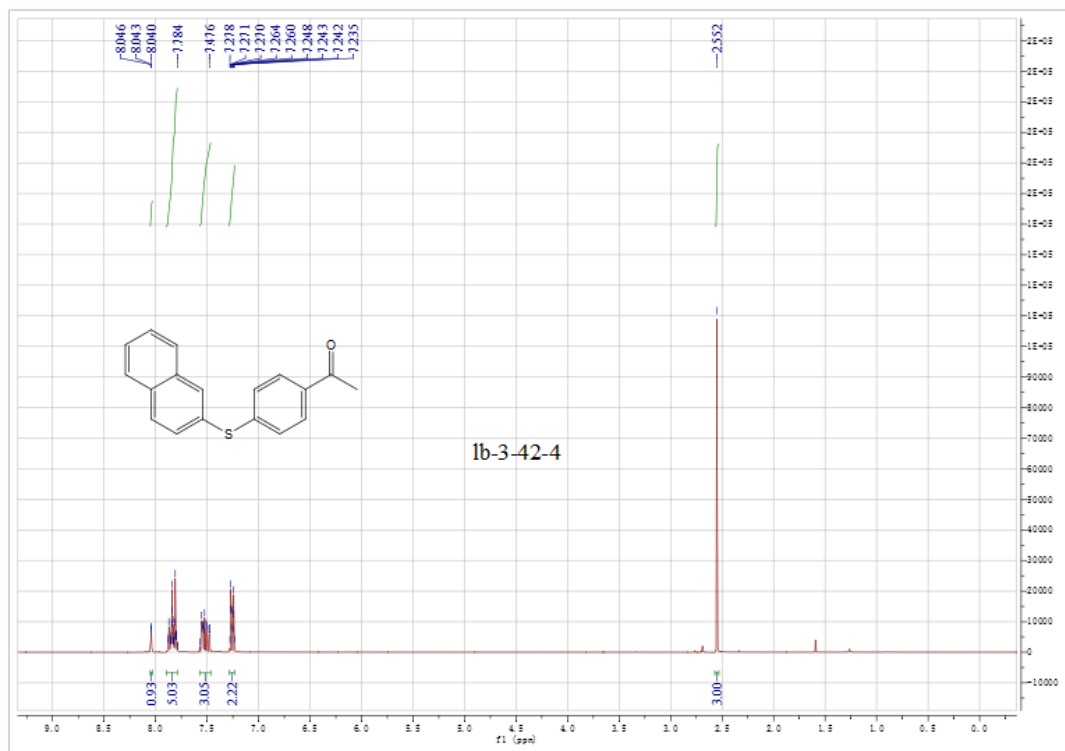

$^{13}\text{C}$  NMR (75 MHz,  $\text{CDCl}_3$ )

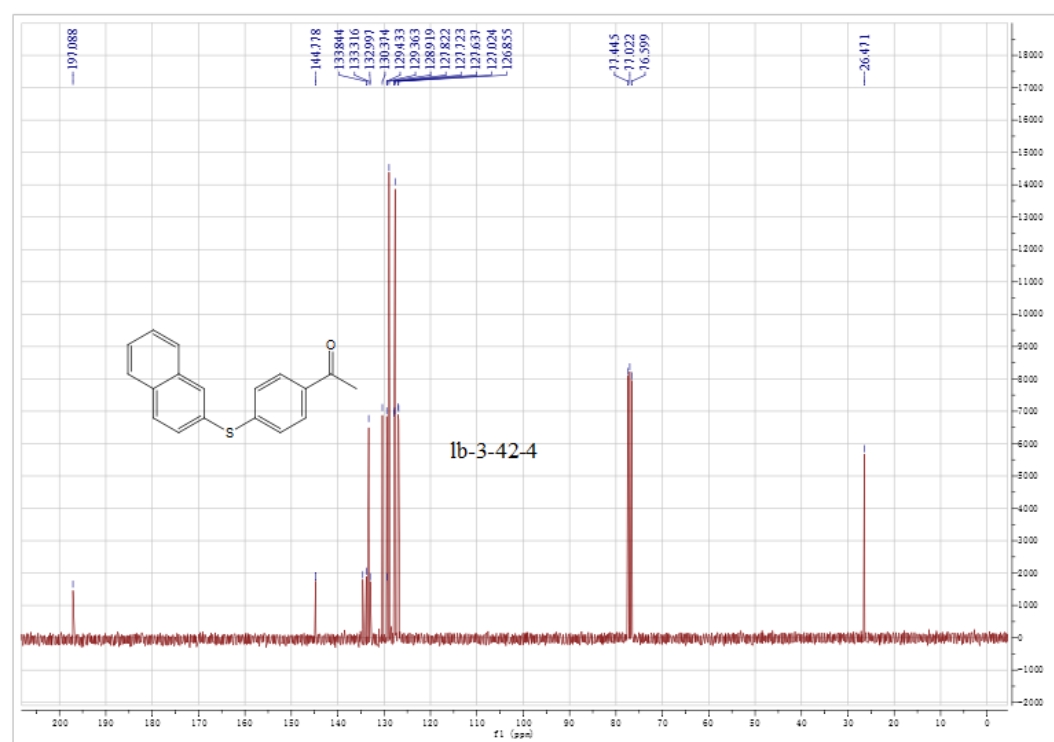

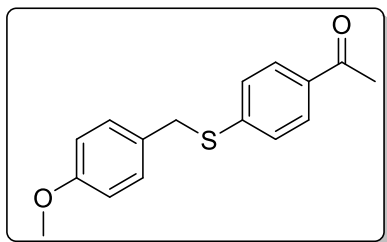

1-(4-((4-Methoxybenzyl)thio)phenyl)ethan-1-one (3l),  $^1\text{H}$  NMR (300 MHz,  $\text{CDCl}_3$ )

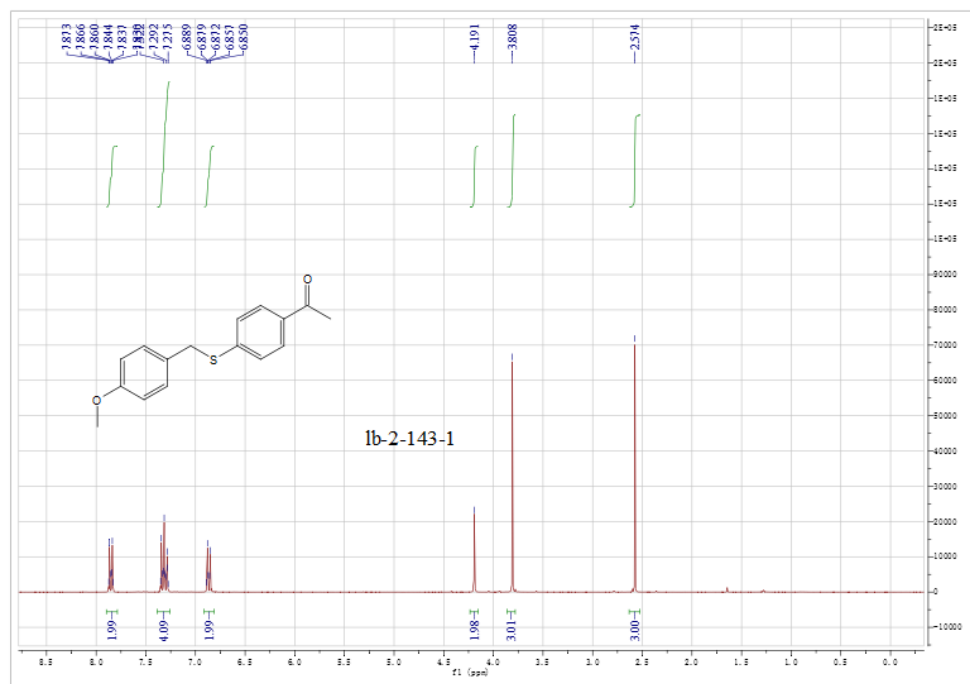

$^{13}\text{C}$  NMR (75 MHz,  $\text{CDCl}_3$ )

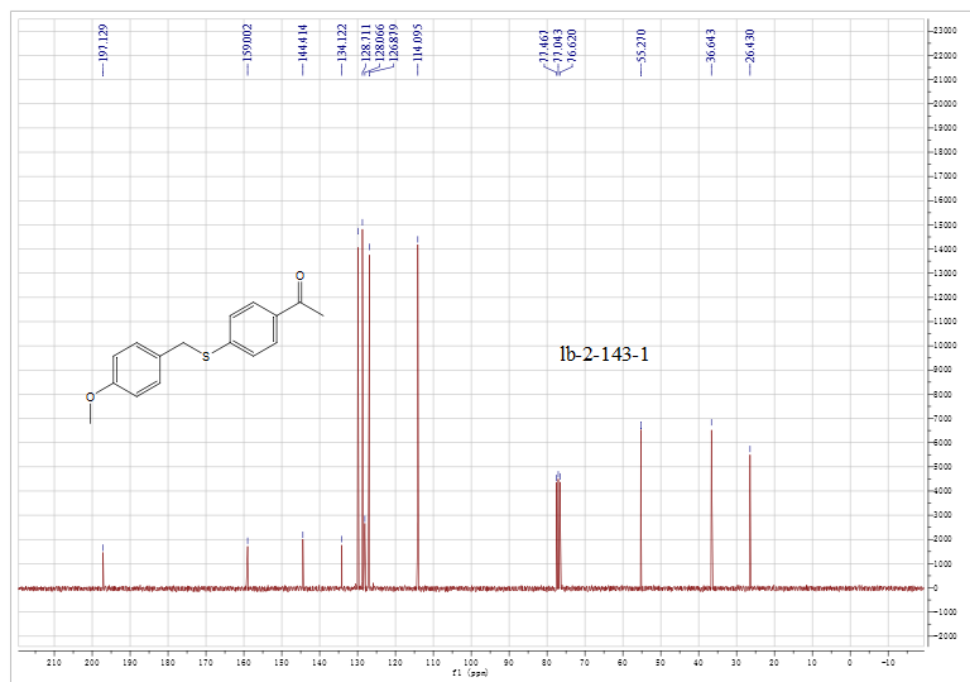

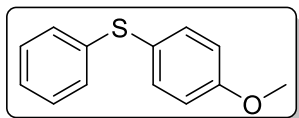

(4-Methoxyphenyl)(phenyl)sulfane (4a),  $^1\text{H}$  NMR (300 MHz,  $\text{CDCl}_3$ )

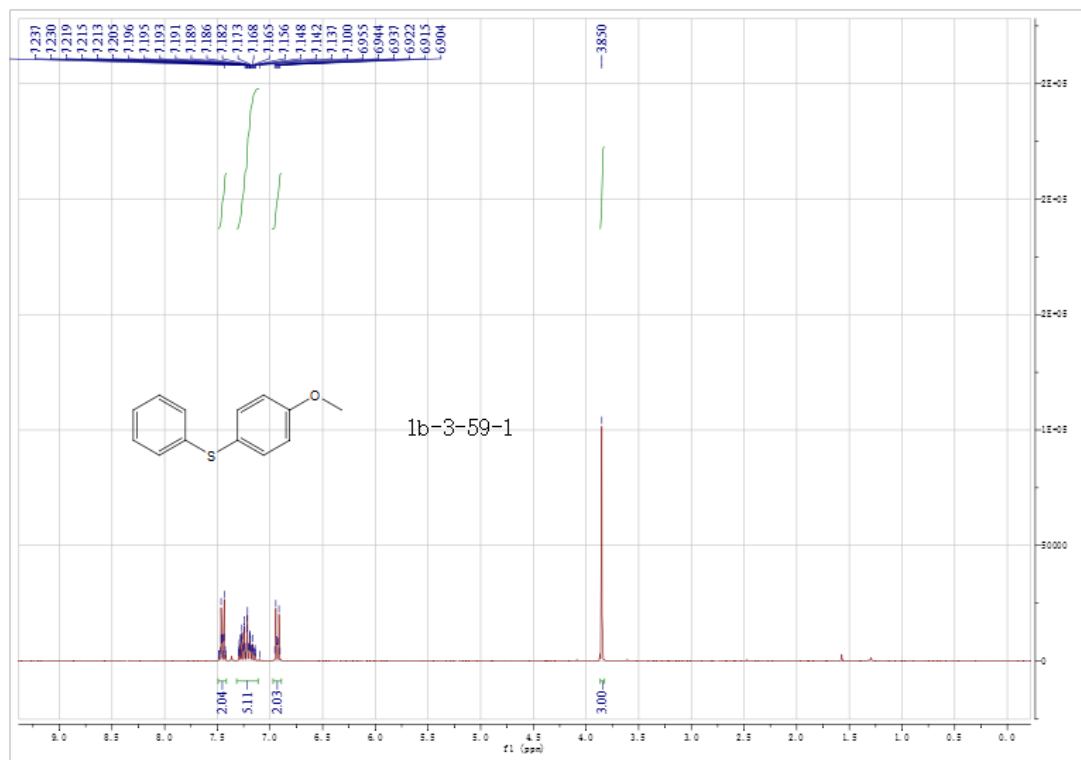

$^{13}\text{C}$  NMR (75 MHz,  $\text{CDCl}_3$ )

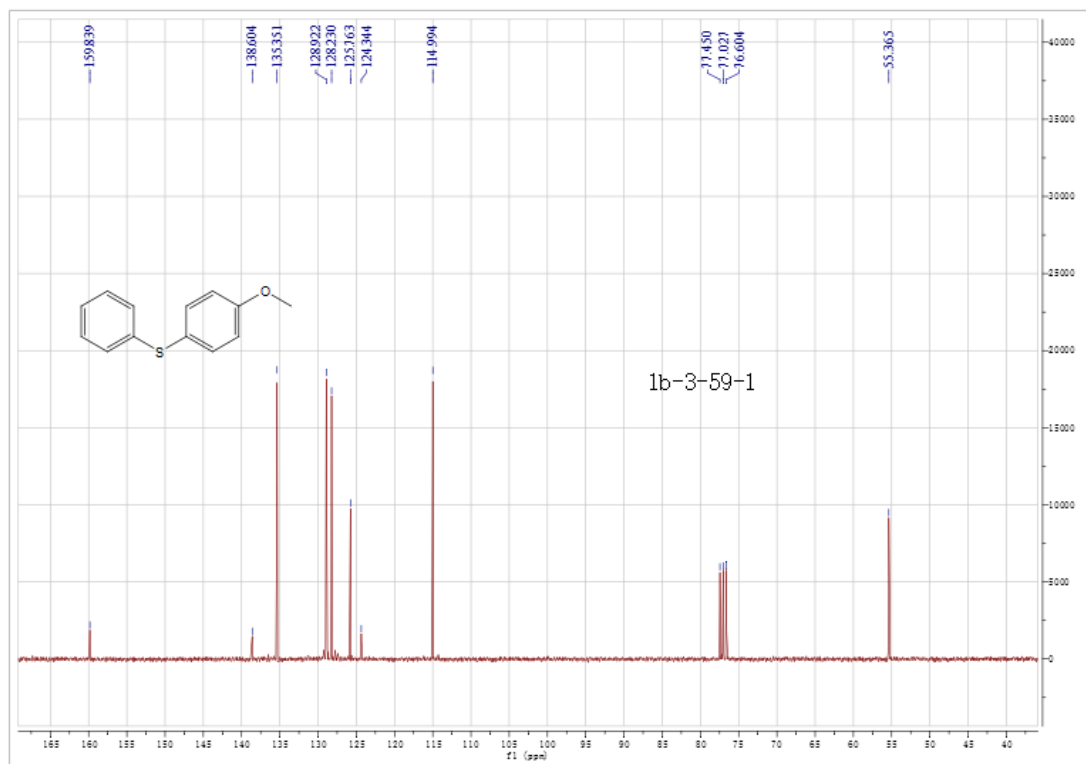



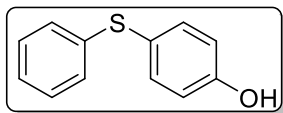

4-(Phenylthio)phenol (4b),  $^1\text{H}$  NMR (300 MHz,  $\text{CDCl}_3$ )

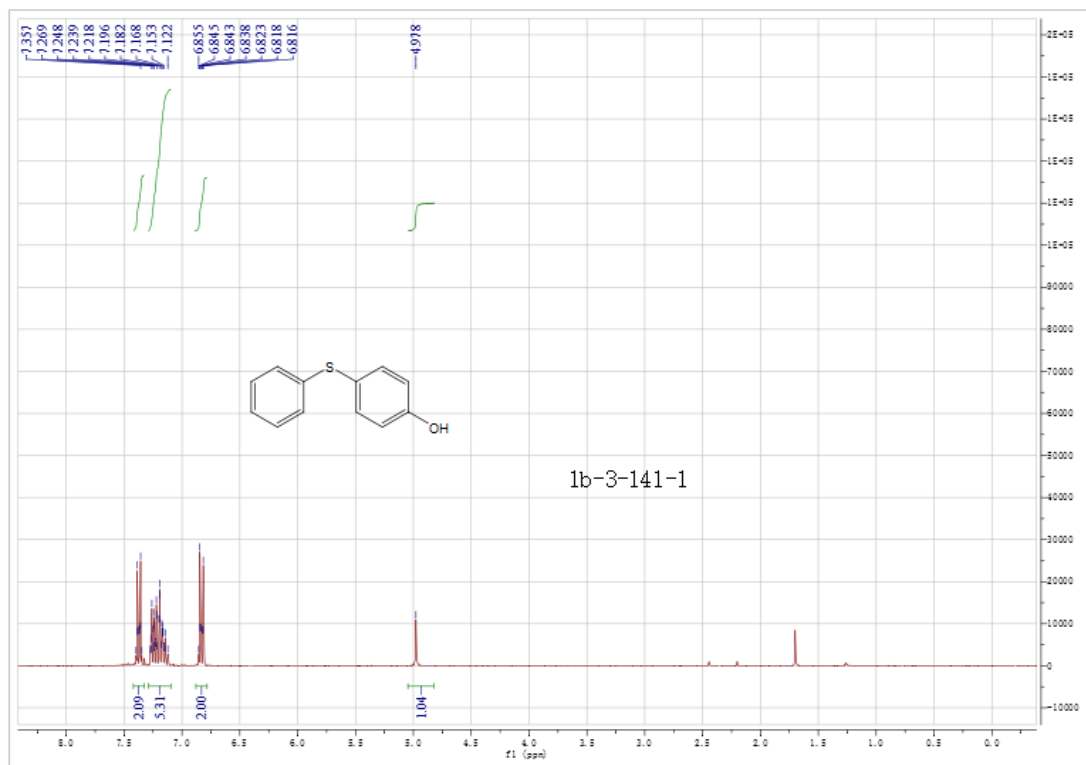

$^{13}\text{C}$  NMR (75 MHz,  $\text{CDCl}_3$ )

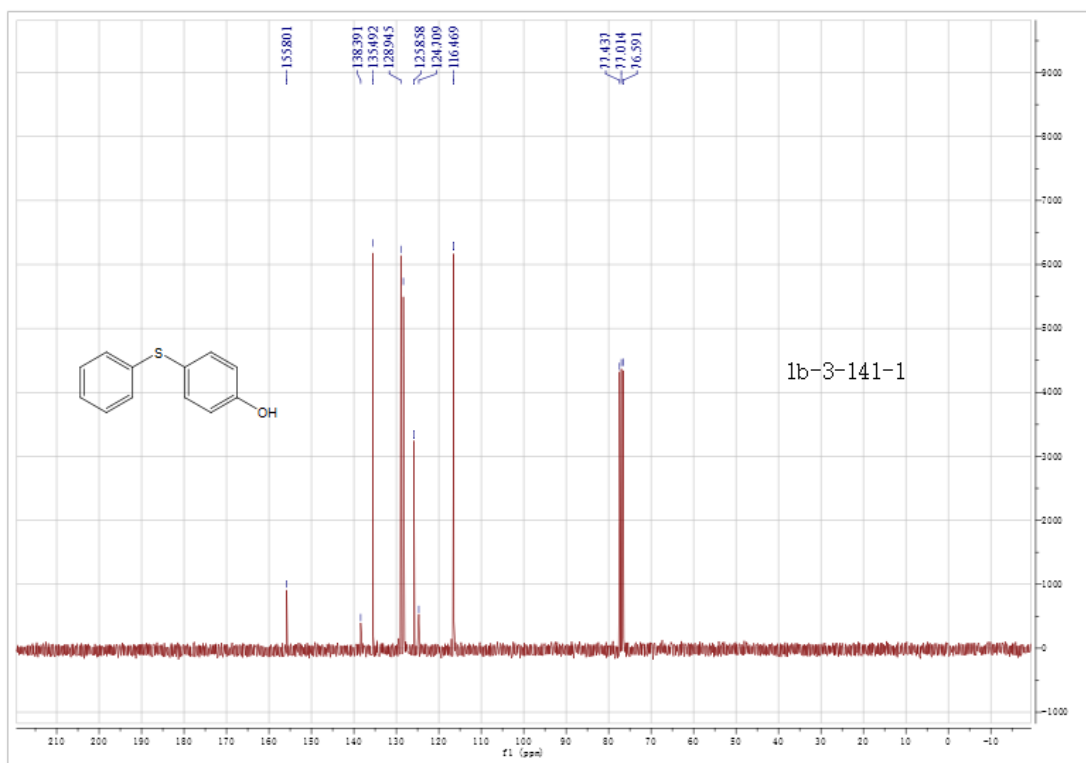

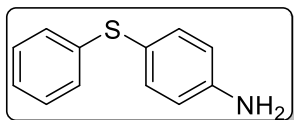

4-(Phenylthio)aniline (4c),  $^1\text{H}$  NMR (300 MHz,  $\text{CDCl}_3$ )

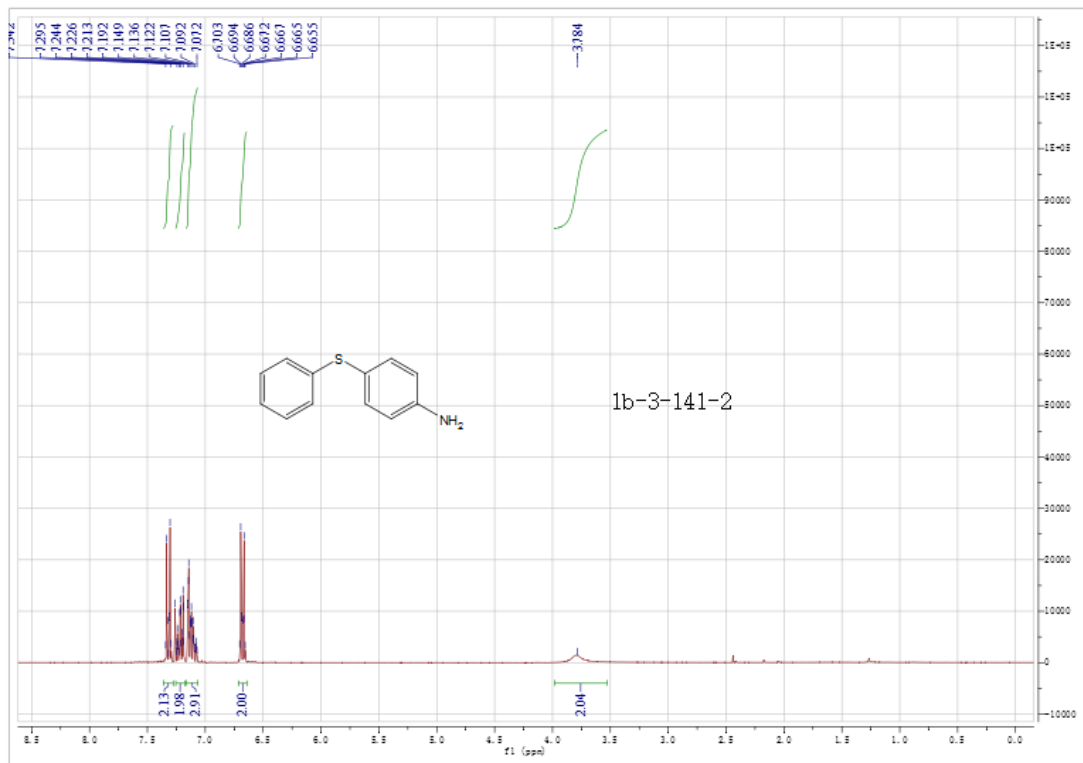

$^{13}\text{C}$  NMR (75 MHz,  $\text{CDCl}_3$ )

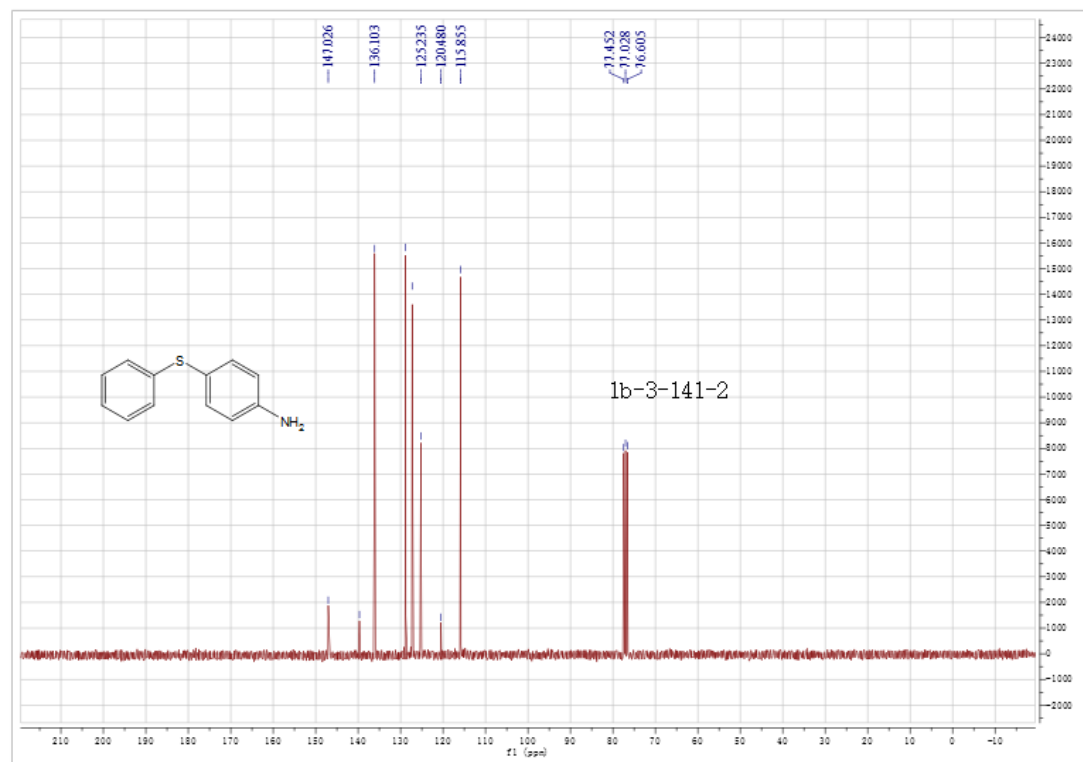

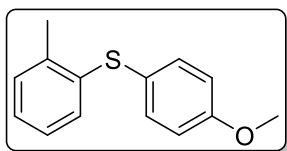

(4-Methoxyphenyl)(*o*-tolyl)sulfane (4d),  $^1\text{H}$  NMR (300 MHz,  $\text{CDCl}_3$ )

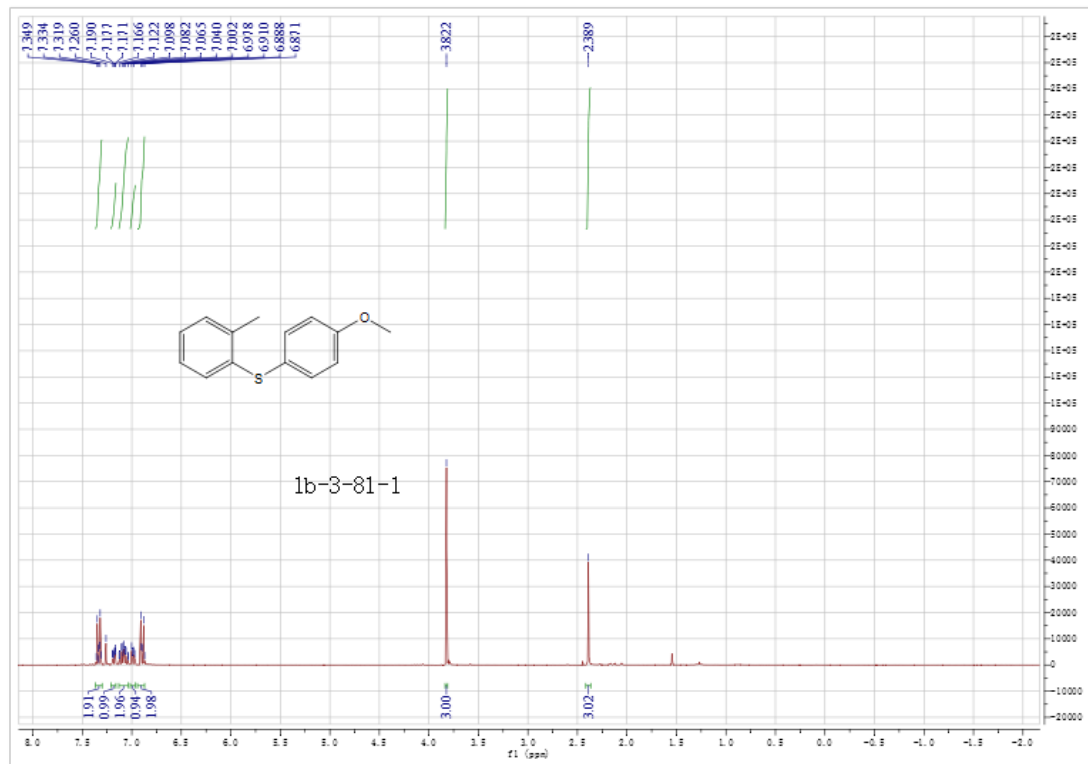

$^{13}\text{C}$  NMR (75 MHz,  $\text{CDCl}_3$ )

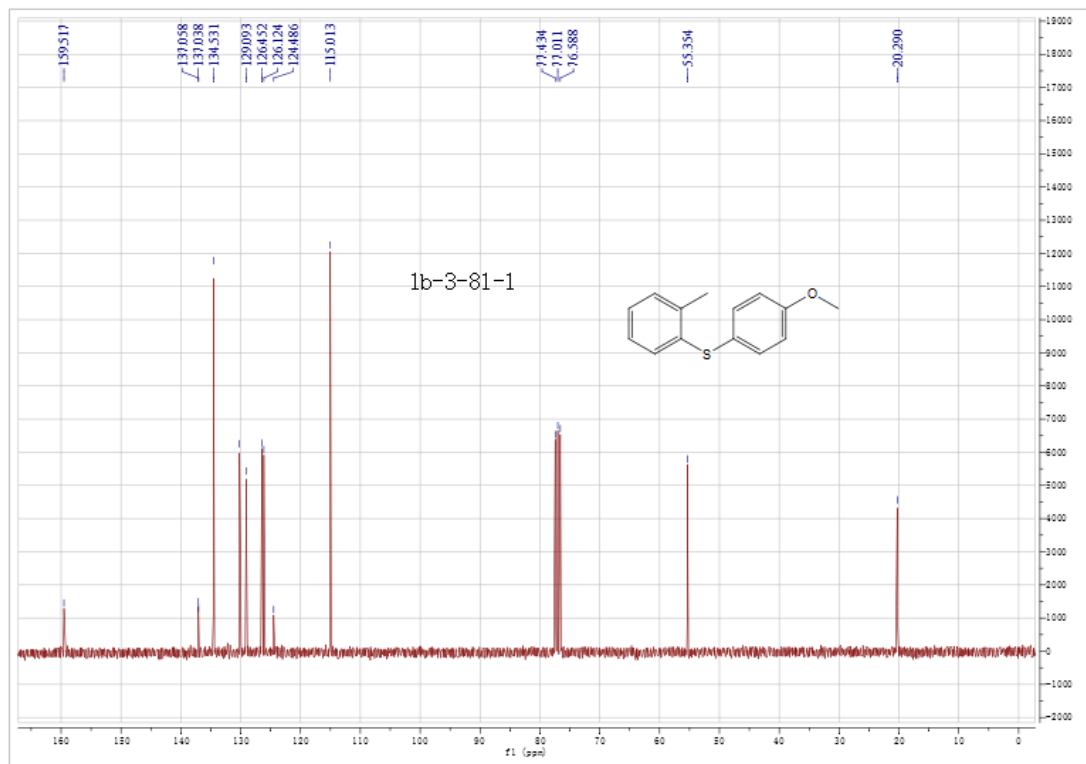

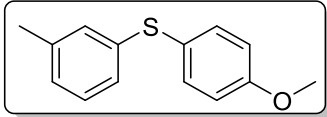

(4-Methoxyphenyl)(*m*-tolyl)sulfane (4e),  $^1\text{H}$  NMR (300 MHz,  $\text{CDCl}_3$ )

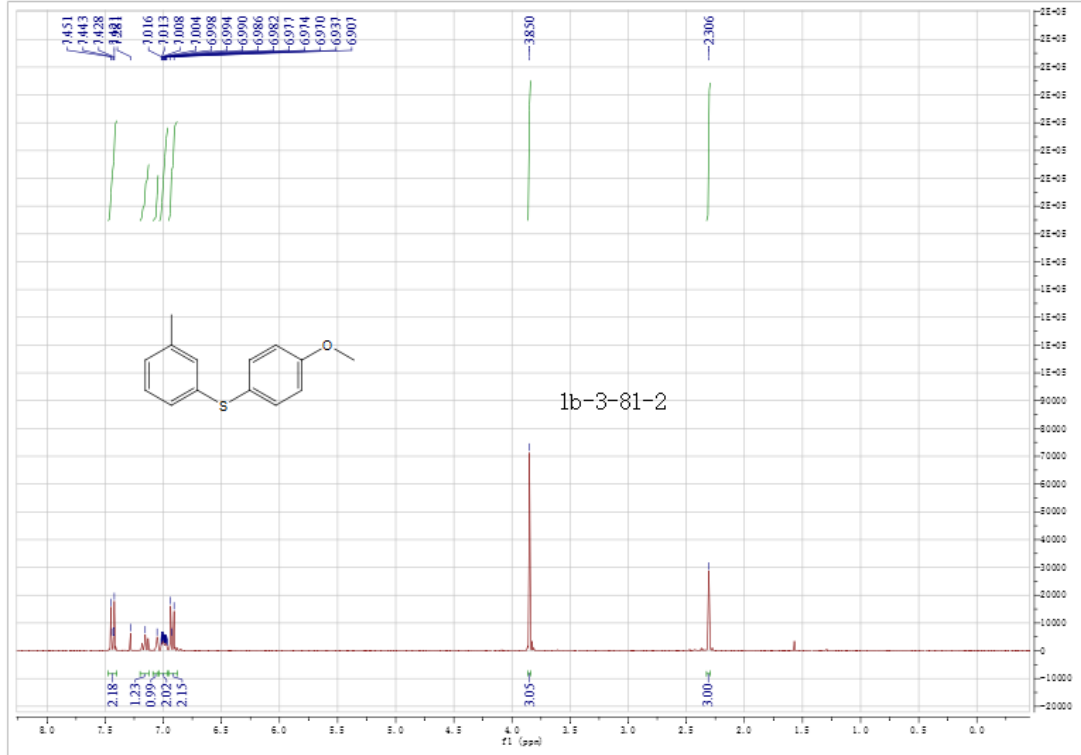

$^{13}\text{C}$  NMR (75 MHz,  $\text{CDCl}_3$ )

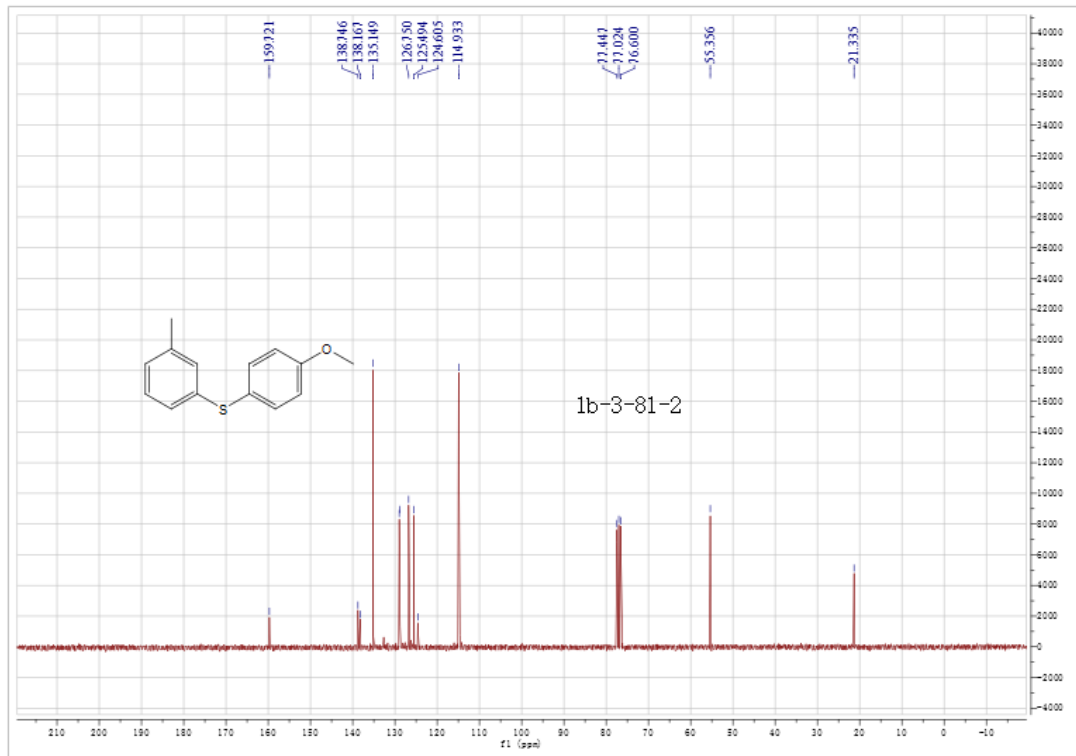

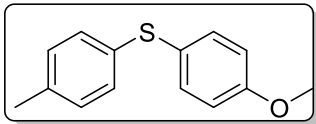

(4-Methoxyphenyl)(p-tolyl)sulfane (4f),  $^1\text{H}$  NMR (300 MHz,  $\text{CDCl}_3$ )

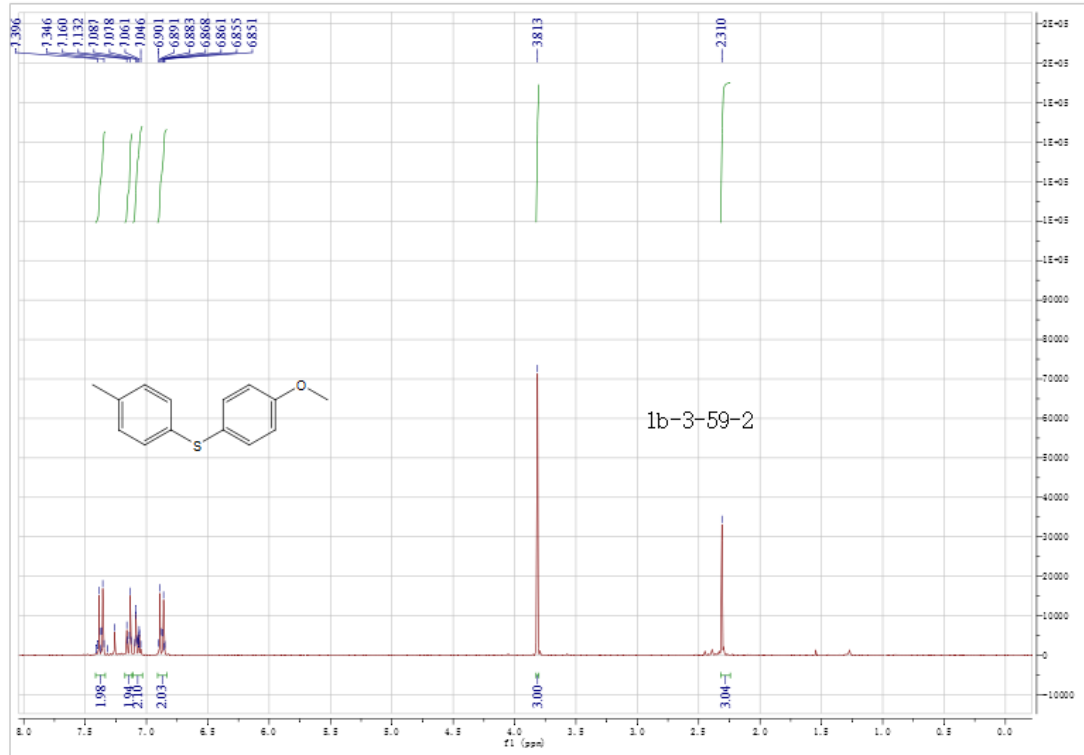

$^{13}\text{C}$  NMR (75 MHz,  $\text{CDCl}_3$ )

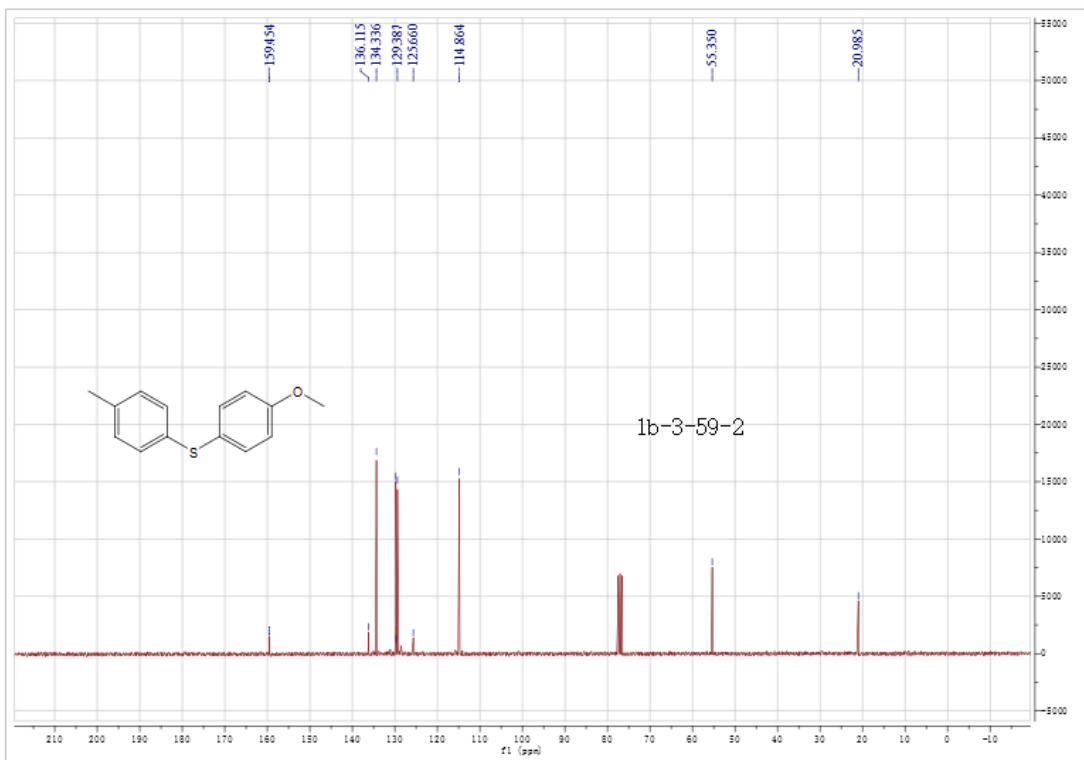

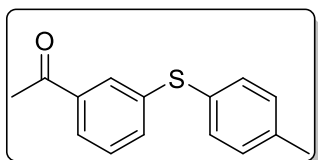

**1-(3-(*p*-Tolylthio)phenyl)ethan-1-one (4g),  $^1\text{H}$  NMR (300 MHz,  $\text{CDCl}_3$ )**

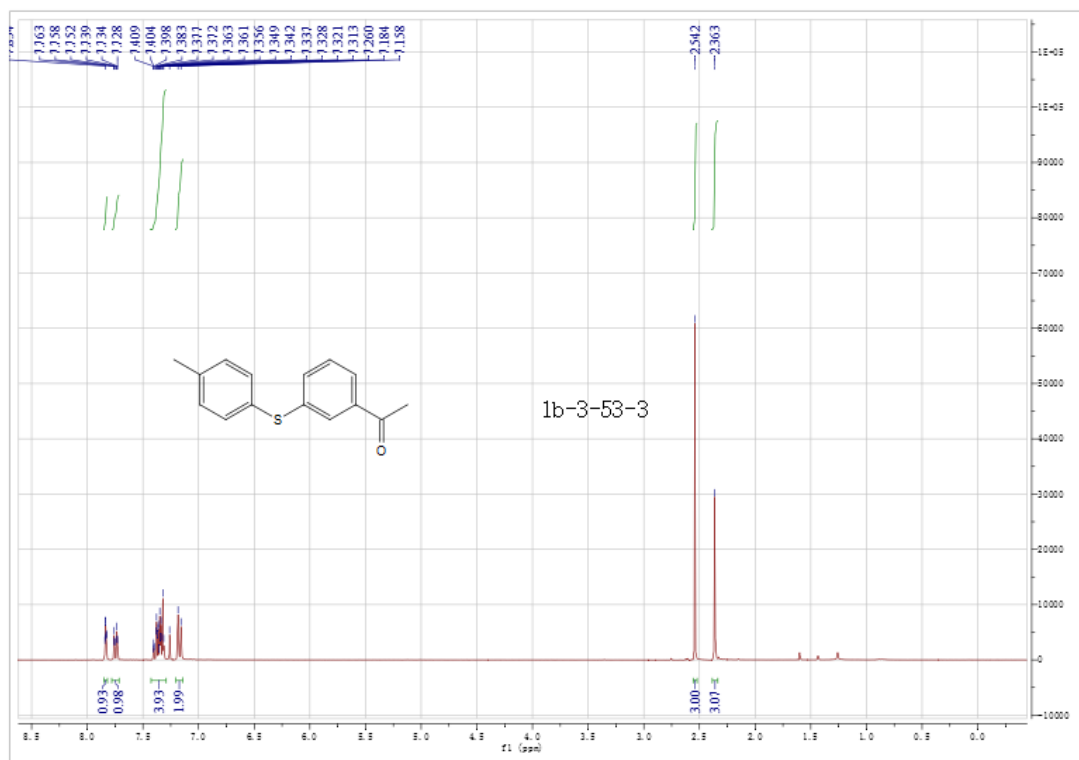

**$^{13}\text{C}$  NMR (75 MHz,  $\text{CDCl}_3$ )**

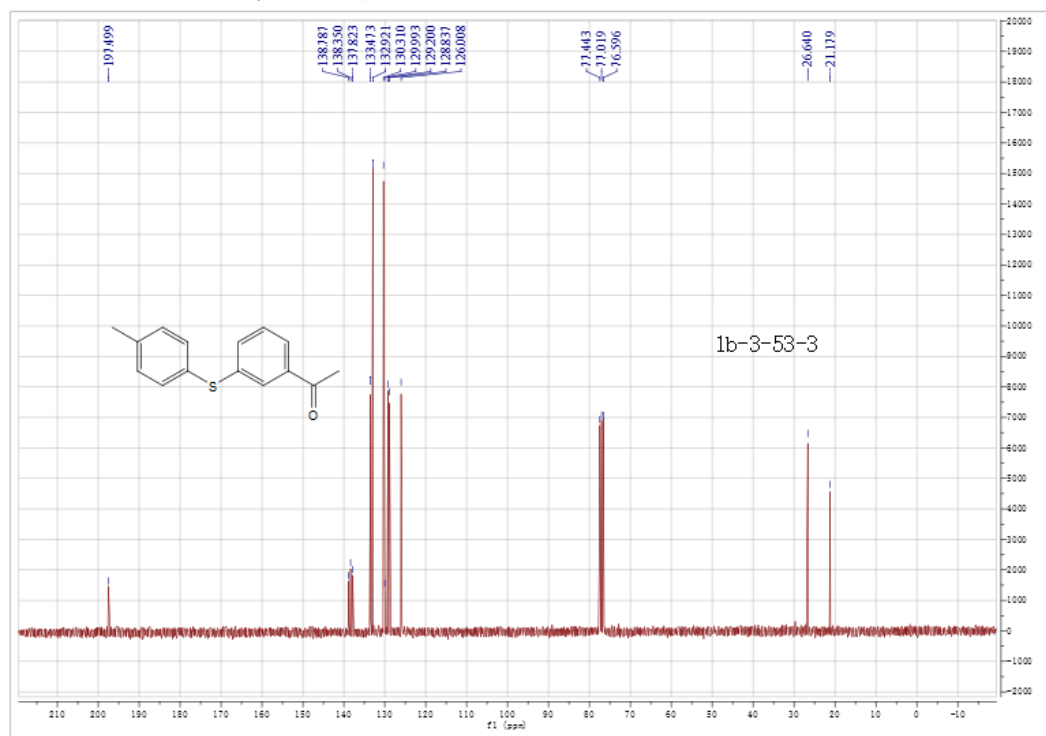

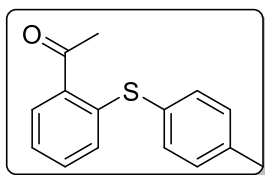

1-(2-(*p*-Tolylthio)phenyl)ethan-1-one (4h),  $^1\text{H}$  NMR (300 MHz,  $\text{CDCl}_3$ )

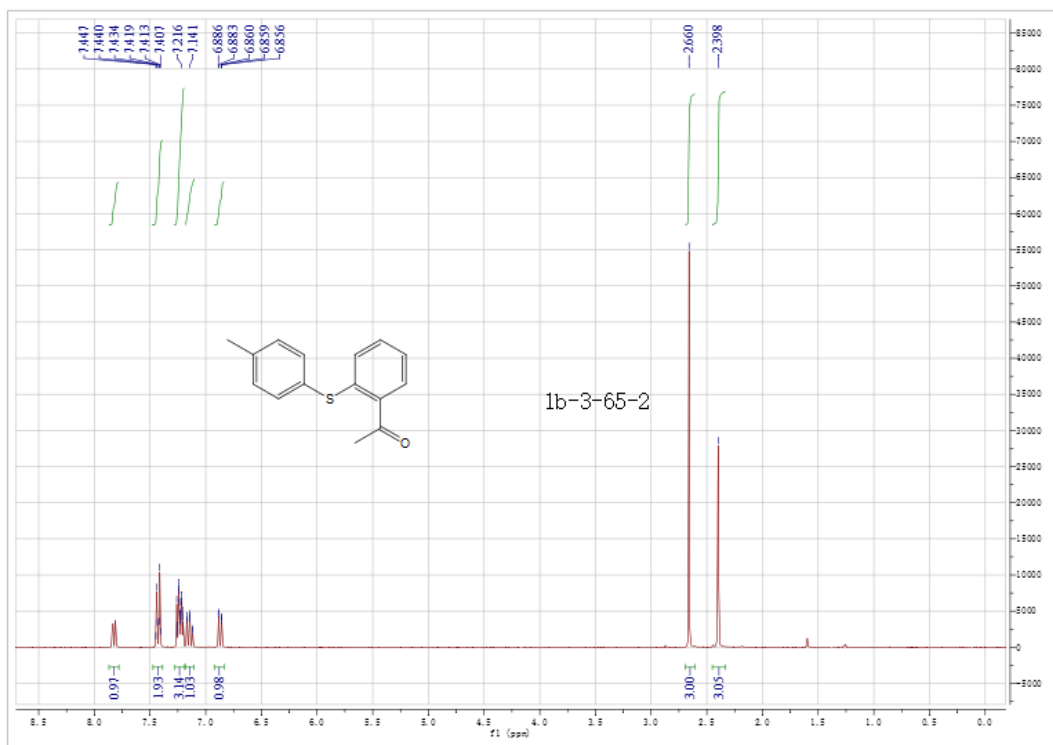

$^{13}\text{C}$  NMR (75 MHz,  $\text{CDCl}_3$ )

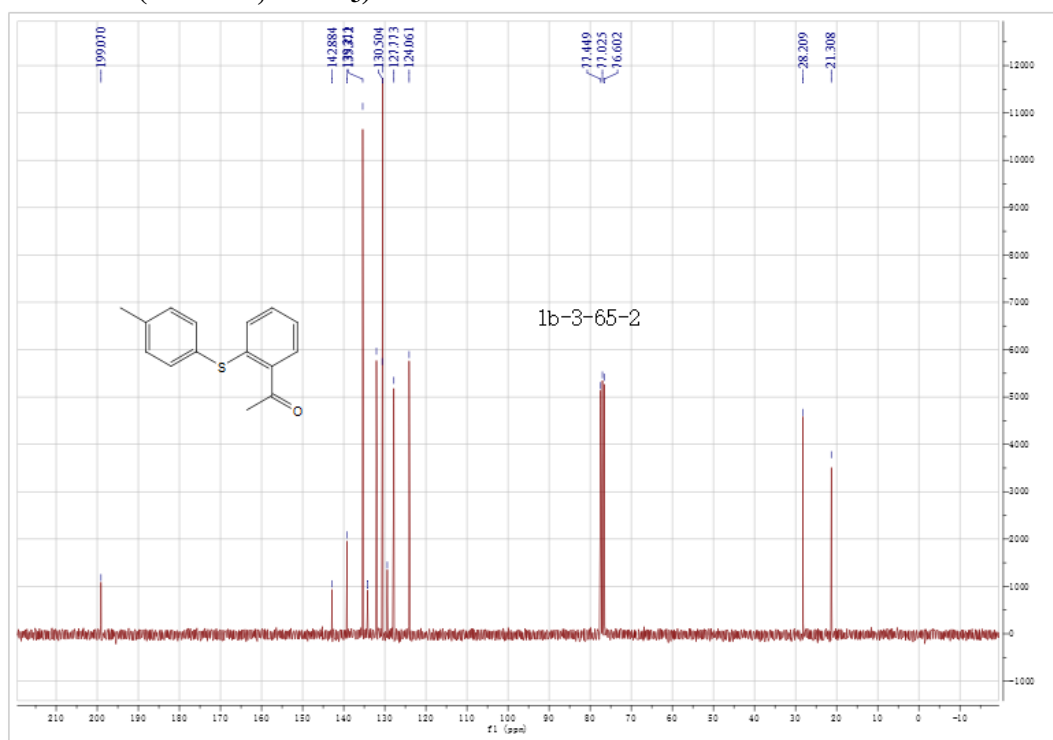

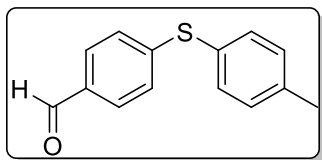

4-(*p*-Tolylthio)benzaldehyde (4i),  $^1\text{H}$  NMR (300 MHz,  $\text{CDCl}_3$ )

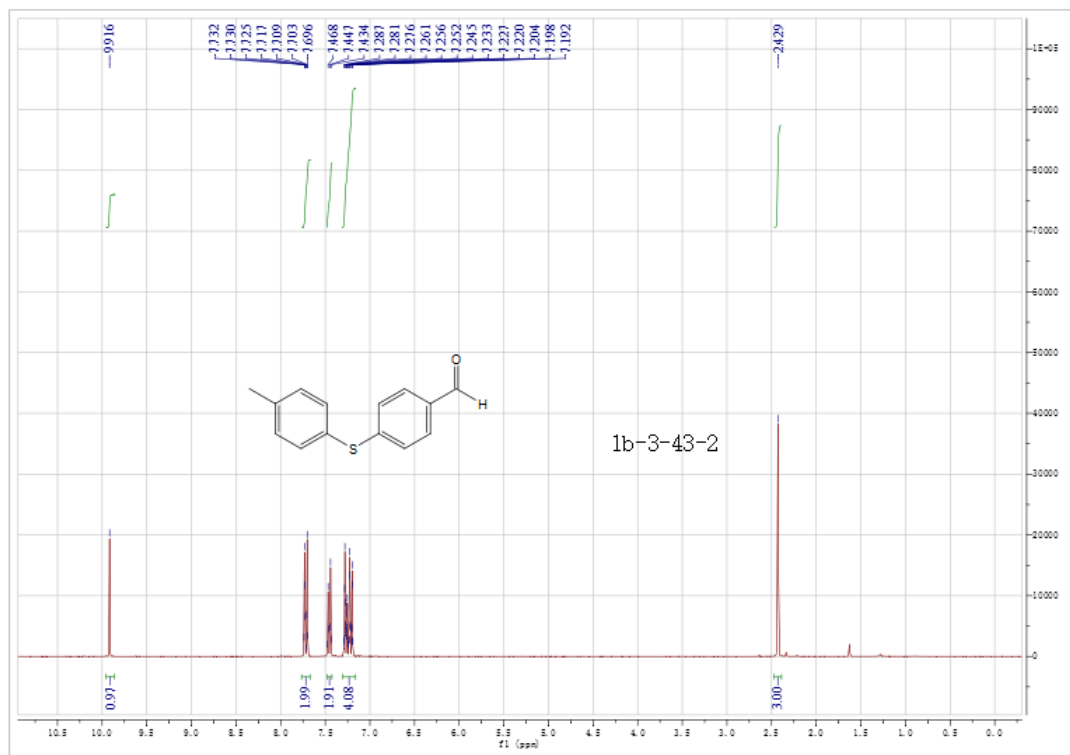

$^{13}\text{C}$  NMR (75 MHz,  $\text{CDCl}_3$ )

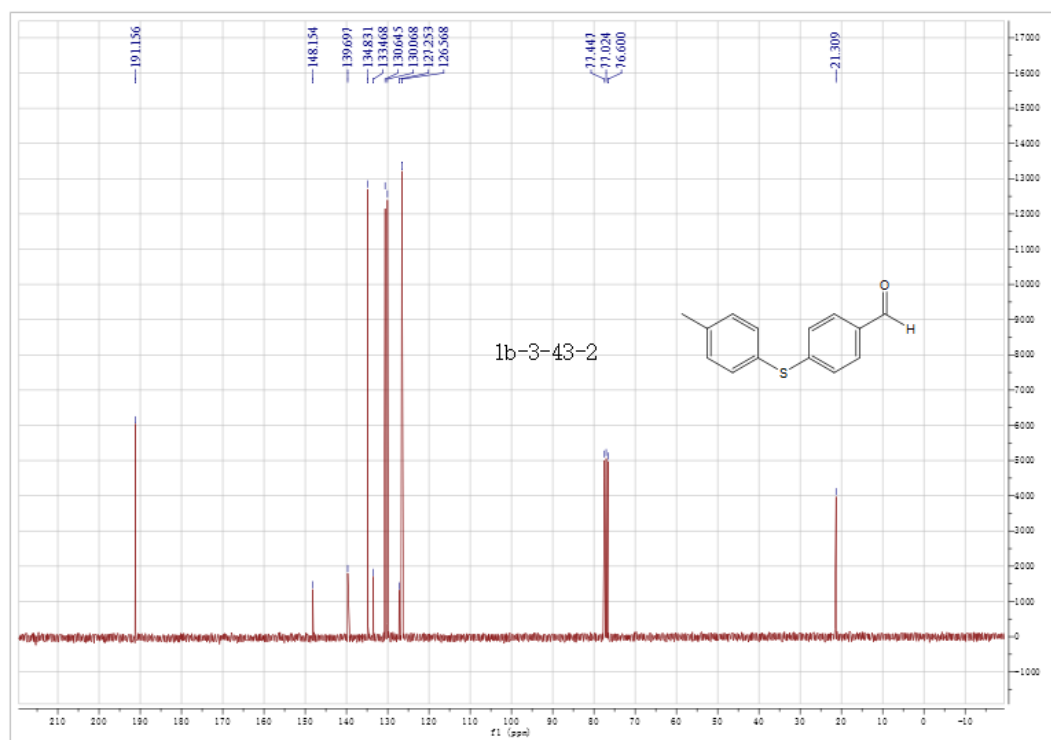



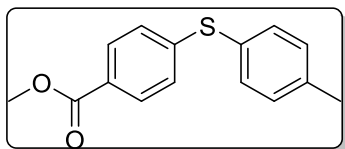

Methyl 4-(*p*-Tolylthio)benzoate (4j),  $^1\text{H}$  NMR (300 MHz,  $\text{CDCl}_3$ )

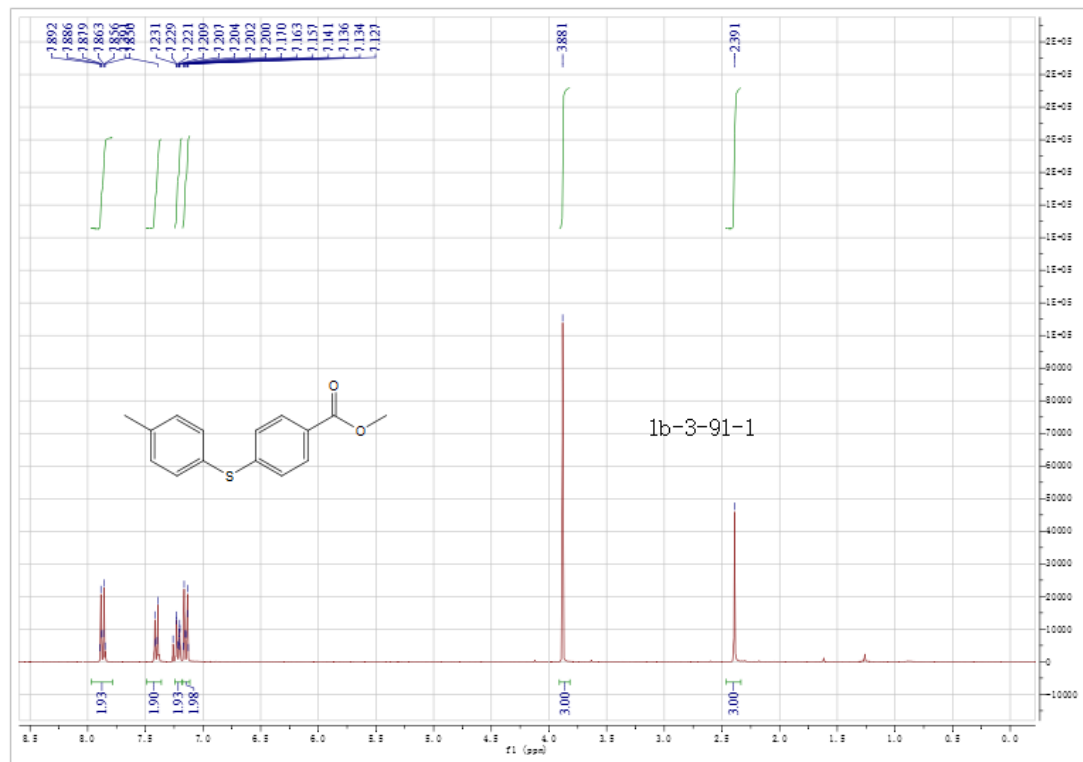

$^{13}\text{C}$  NMR (75 MHz,  $\text{CDCl}_3$ )

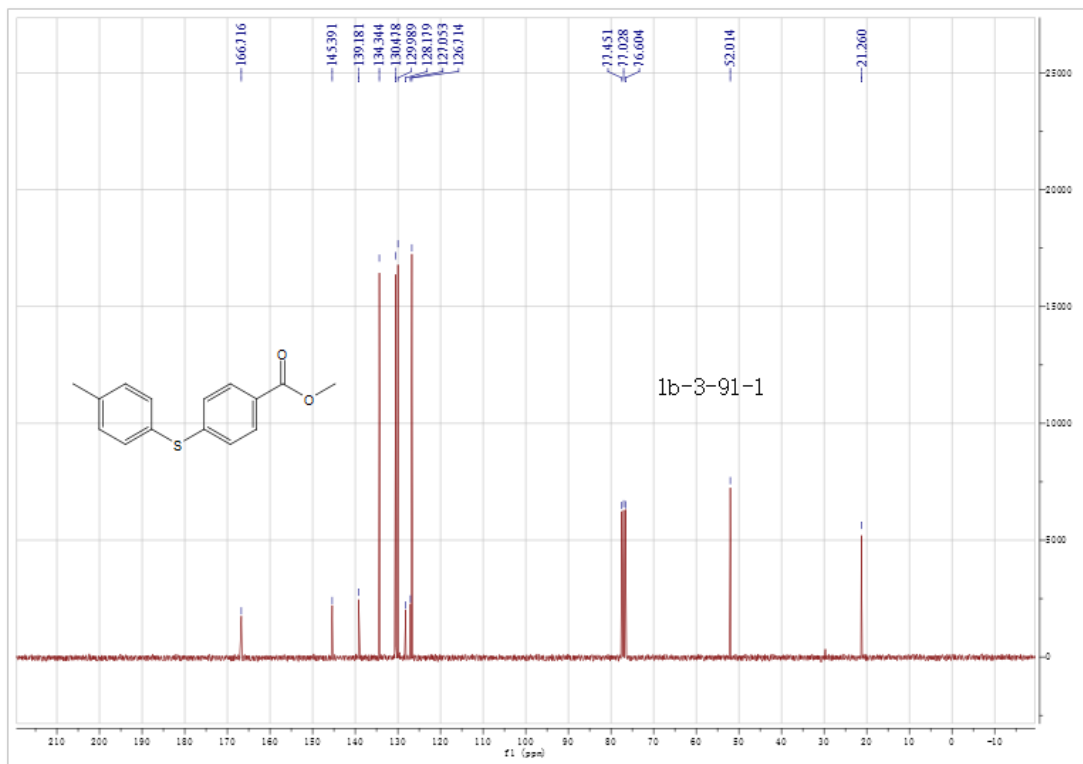

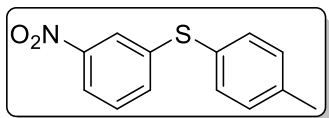

**(3-Nitrophenyl)(p-tolyl)sulfane (4k),  $^1\text{H}$  NMR (300 MHz,  $\text{CDCl}_3$ )**

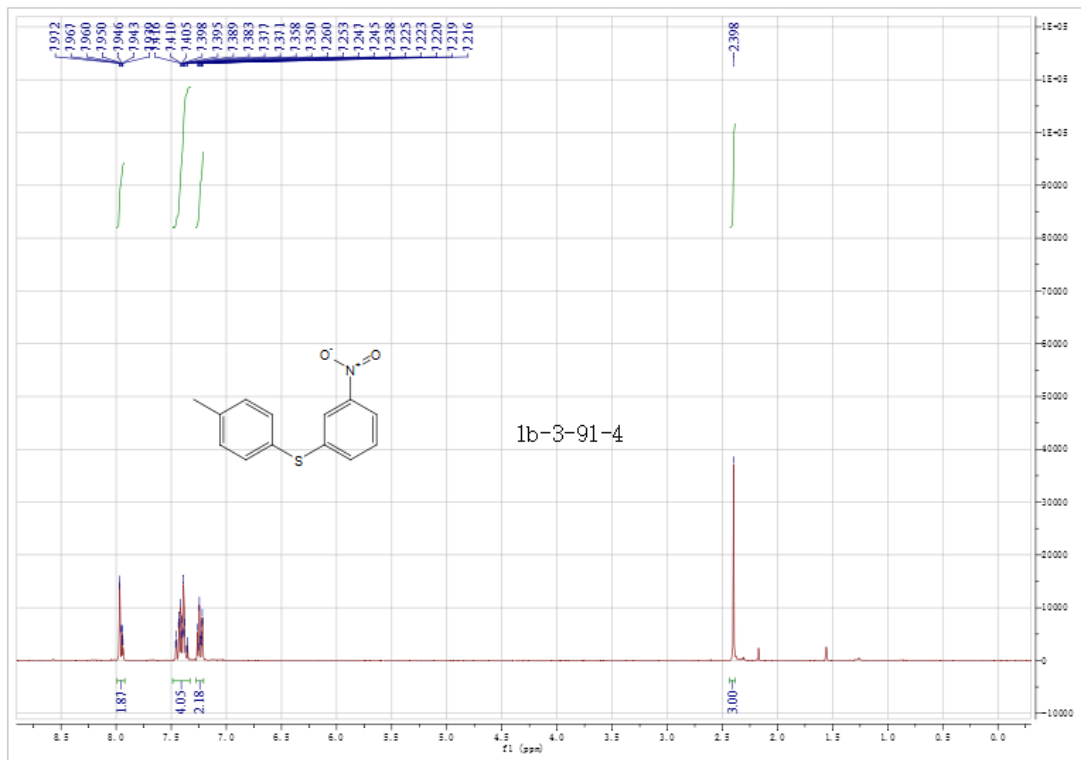

**$^{13}\text{C}$  NMR (75 MHz,  $\text{CDCl}_3$ )**

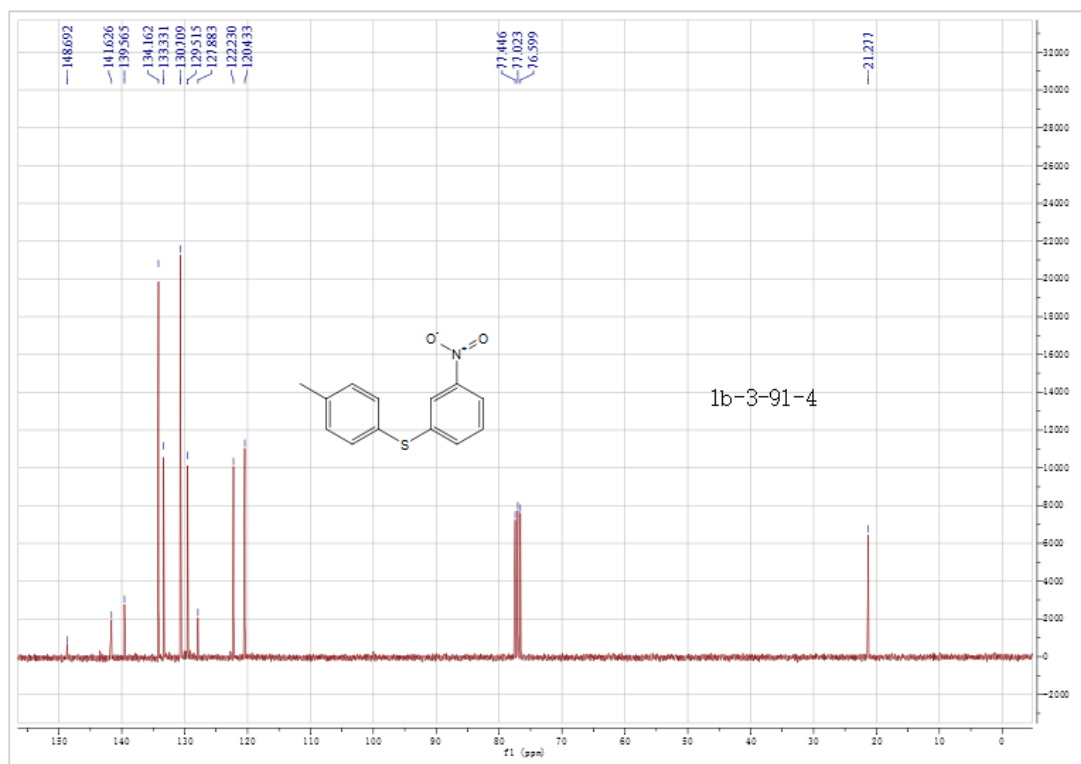

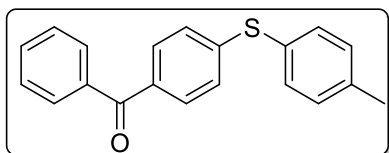

Phenyl-(4-(*p*-tolylthio)phenyl)methanone (4l),  $^1\text{H}$  NMR (300 MHz,  $\text{CDCl}_3$ )

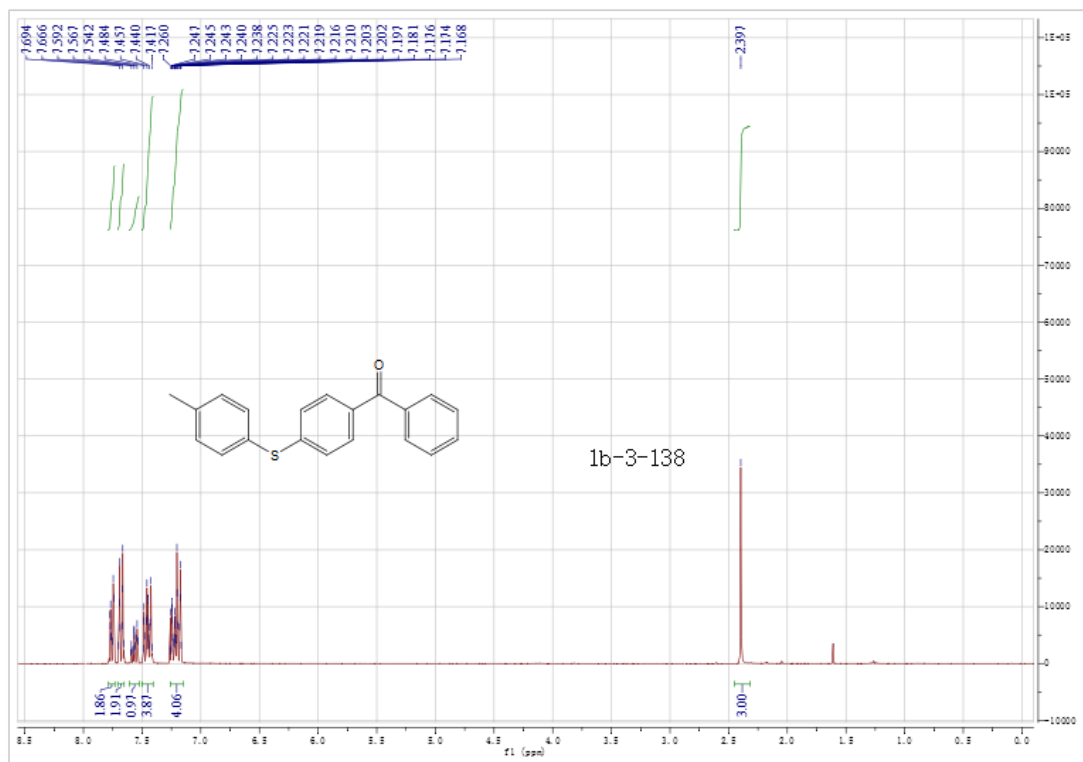

$^{13}\text{C}$  NMR (75 MHz,  $\text{CDCl}_3$ )

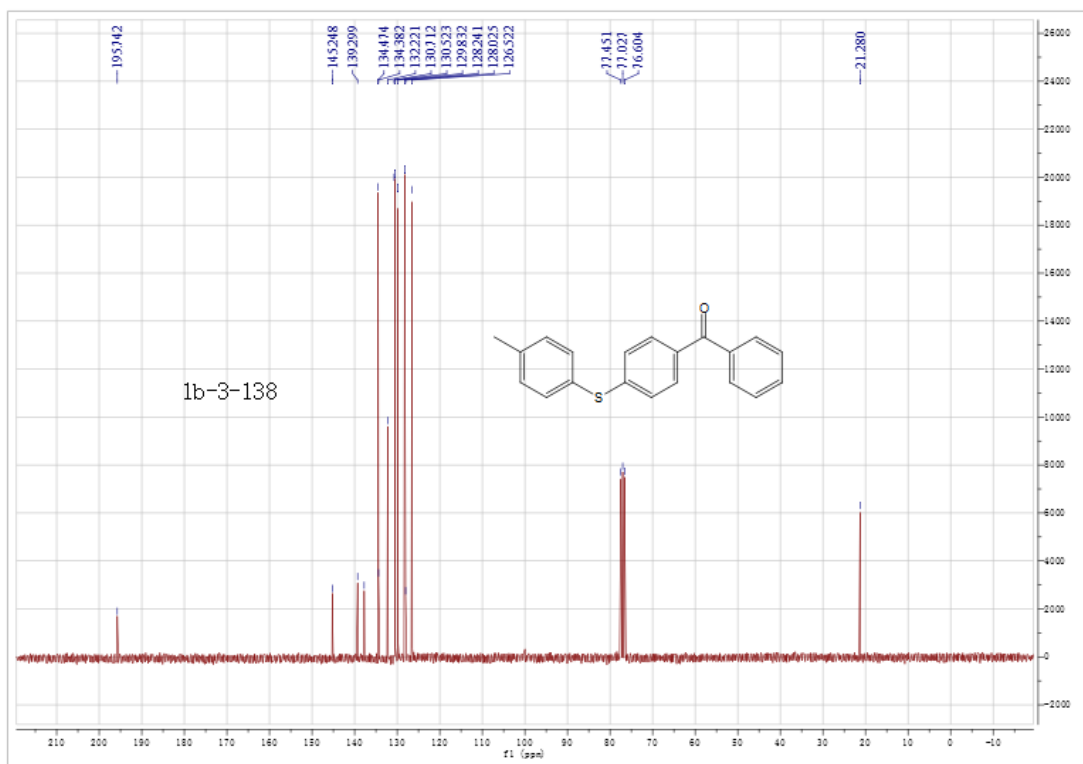

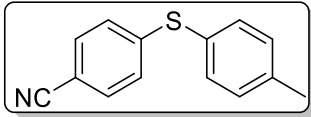

4-(*p*-Tolylthio)benzonitrile (4m),  $^1\text{H}$  NMR (300 MHz,  $\text{CDCl}_3$ )

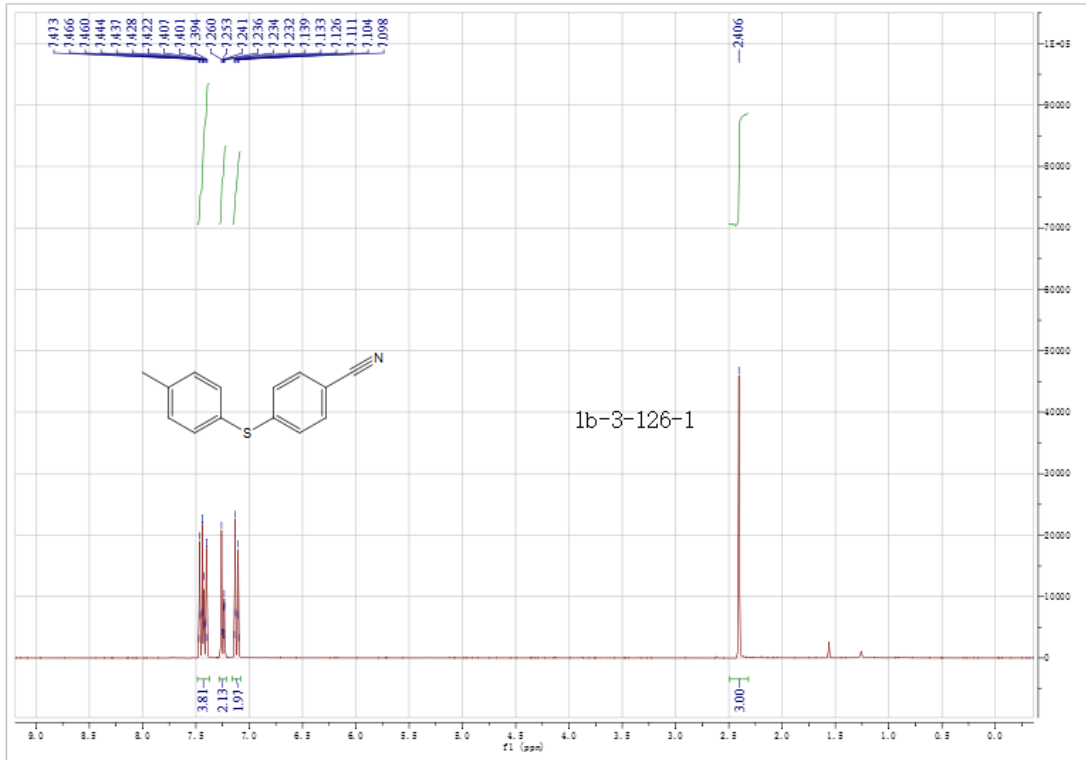

$^{13}\text{C}$  NMR (75 MHz,  $\text{CDCl}_3$ )

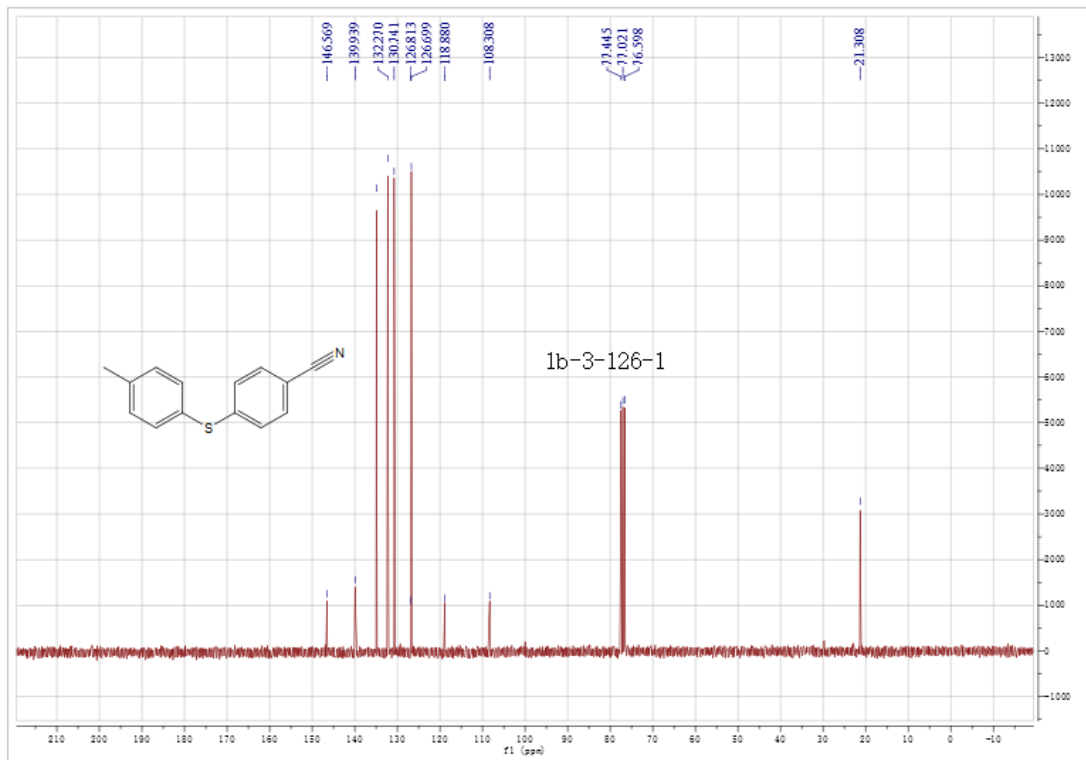

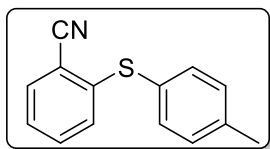

2-(*p*-Tolylthio)benzonitrile (4n),  $^1\text{H}$  NMR (300 MHz,  $\text{CDCl}_3$ )

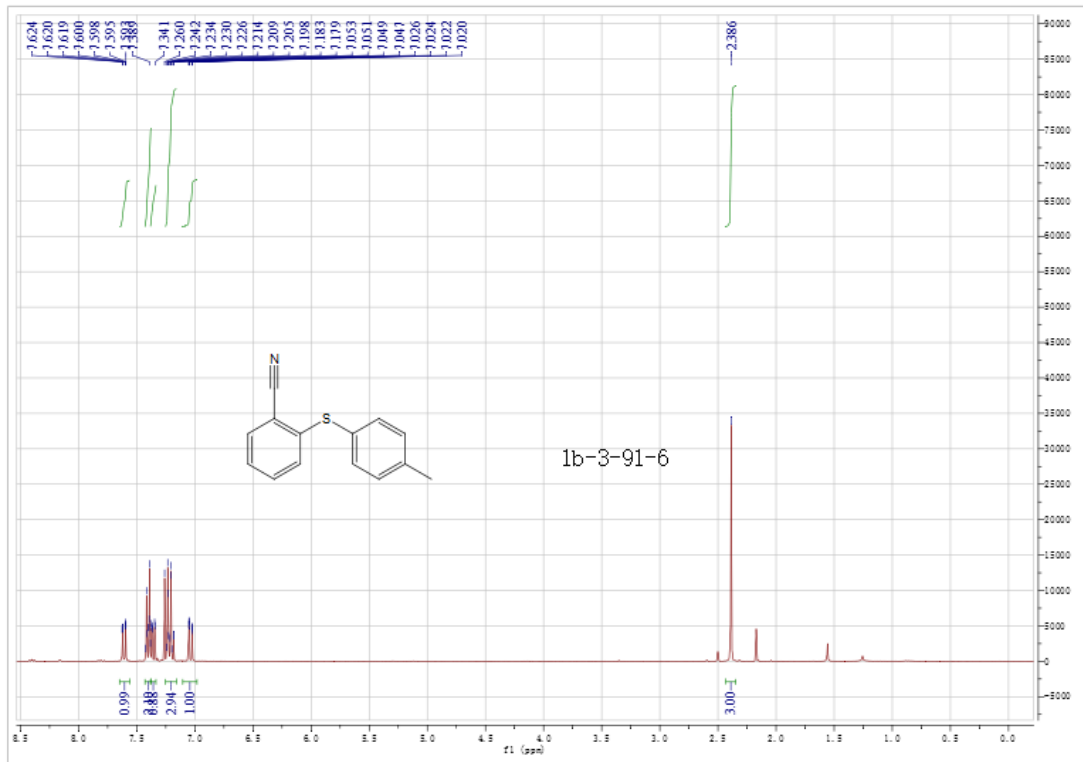

$^{13}\text{C}$  NMR (75 MHz,  $\text{CDCl}_3$ )

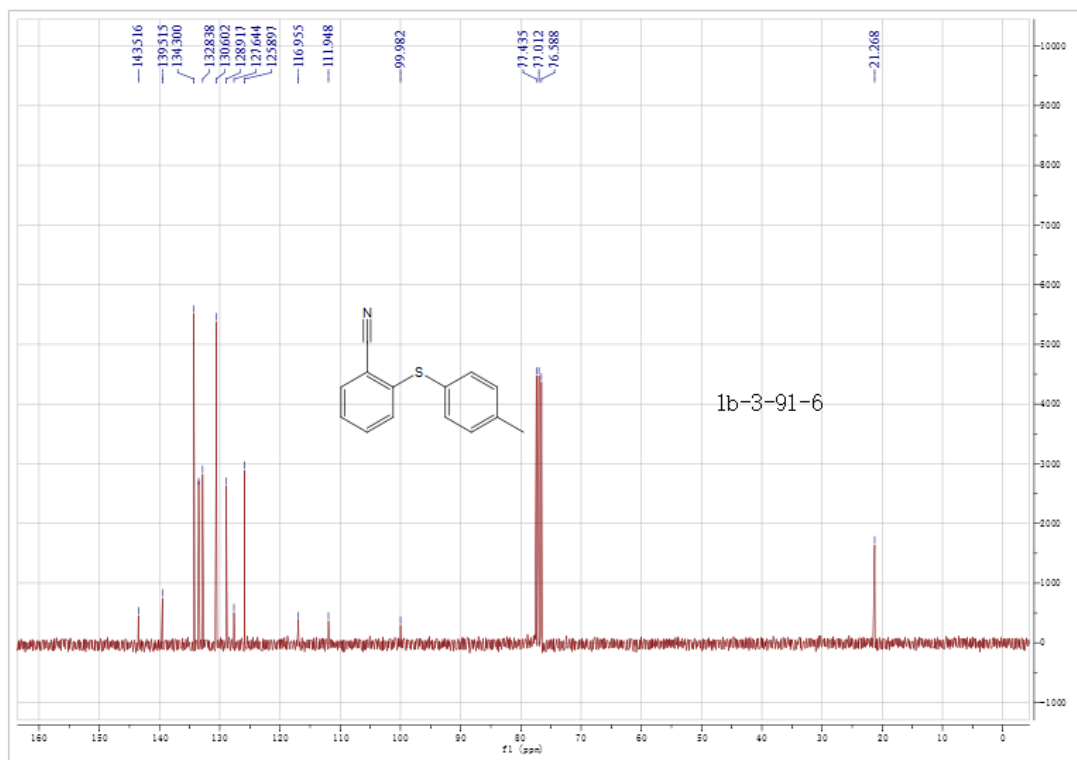

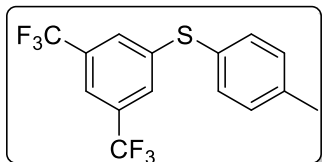

(3,5-Bis(trifluoromethyl)phenyl)(*p*-tolyl)sulfane (4o),  $^1\text{H}$  NMR (300 MHz,  $\text{CDCl}_3$ )

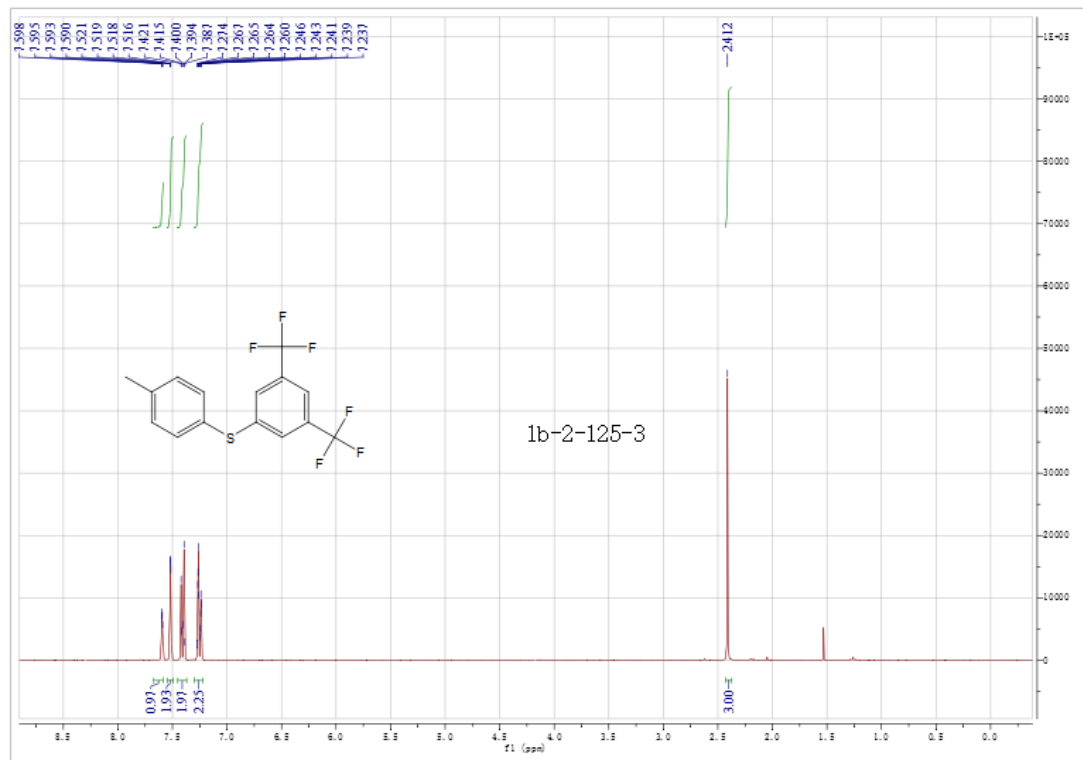

$^{13}\text{C}$  NMR (75 MHz,  $\text{CDCl}_3$ )

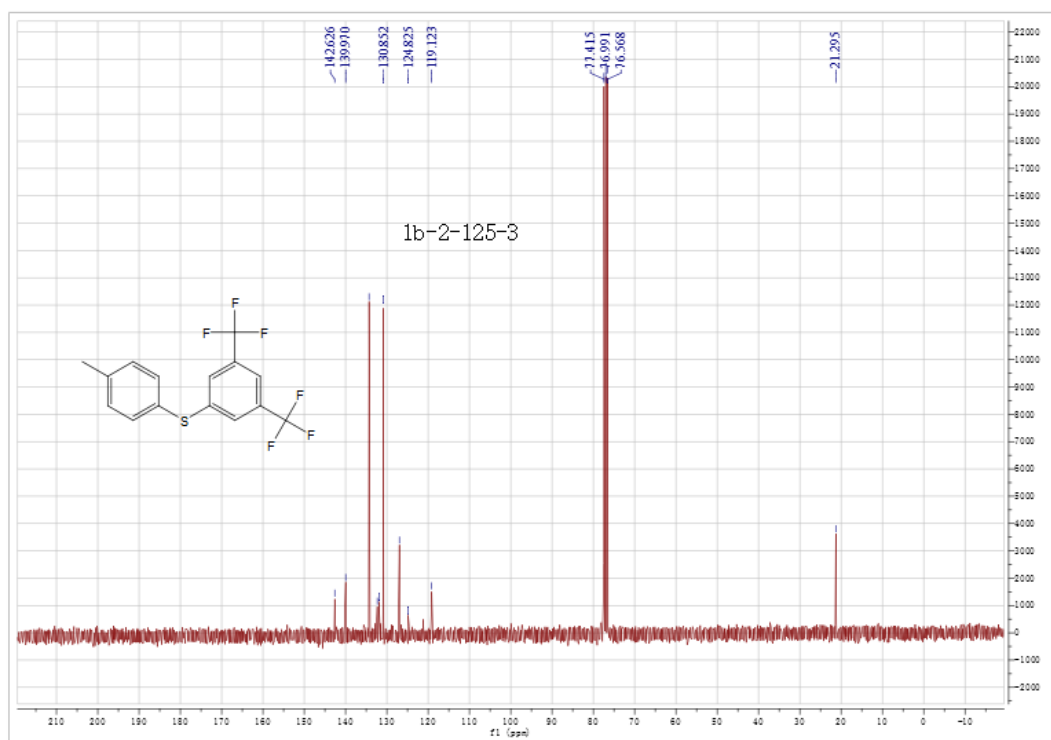

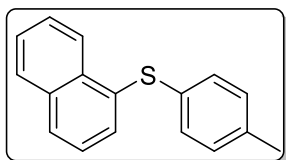

Naphthalen-1-yl(*p*-tolyl)sulfane (4p),  $^1\text{H}$  NMR (300 MHz,  $\text{CDCl}_3$ )

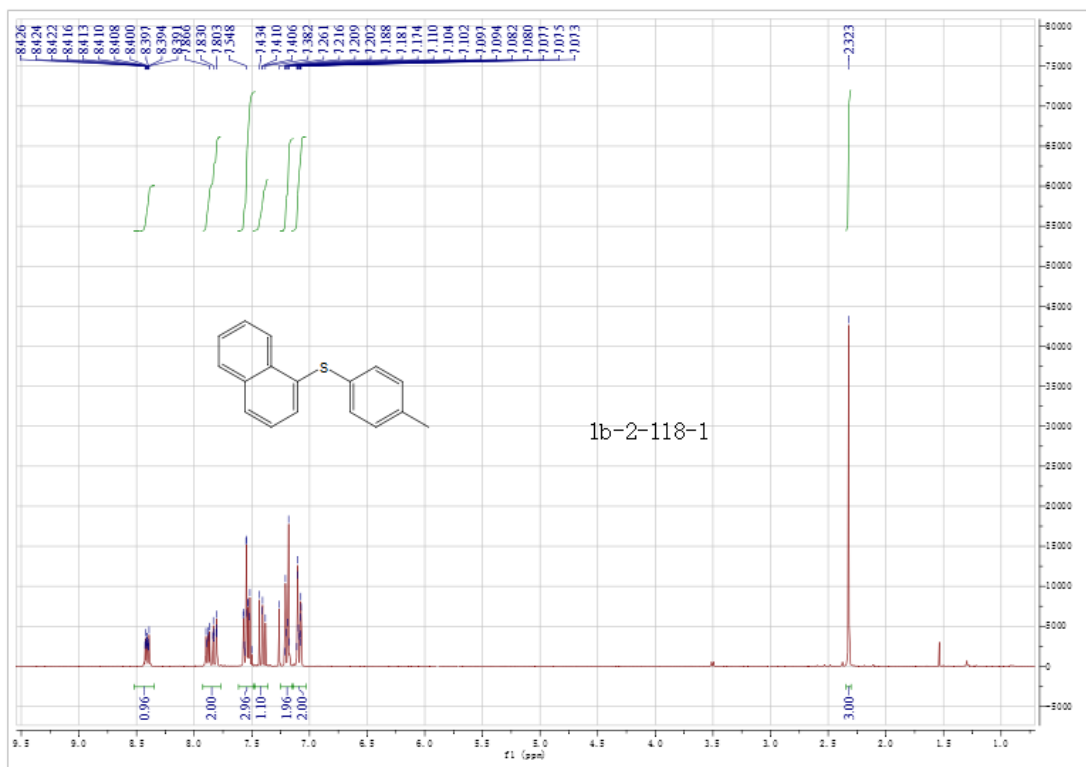

$^{13}\text{C}$  NMR (75 MHz,  $\text{CDCl}_3$ )

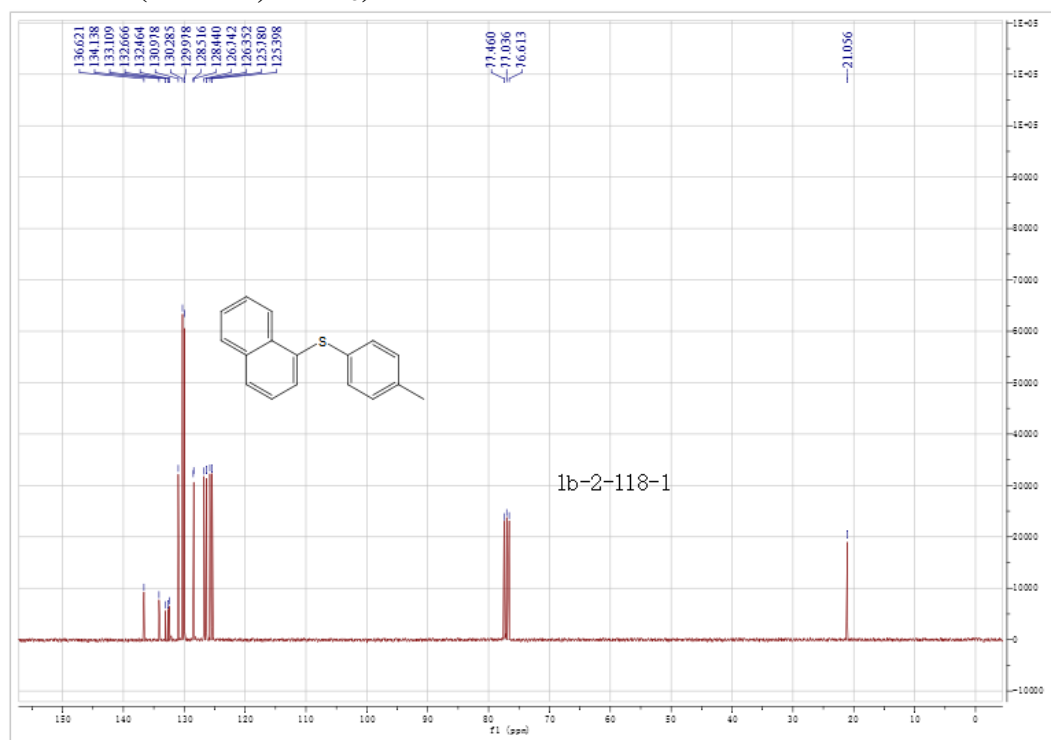

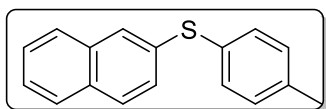

Naphthalen-2-yl(*p*-tolyl)sulfane (4q),  $^1\text{H}$  NMR (300 MHz,  $\text{CDCl}_3$ )

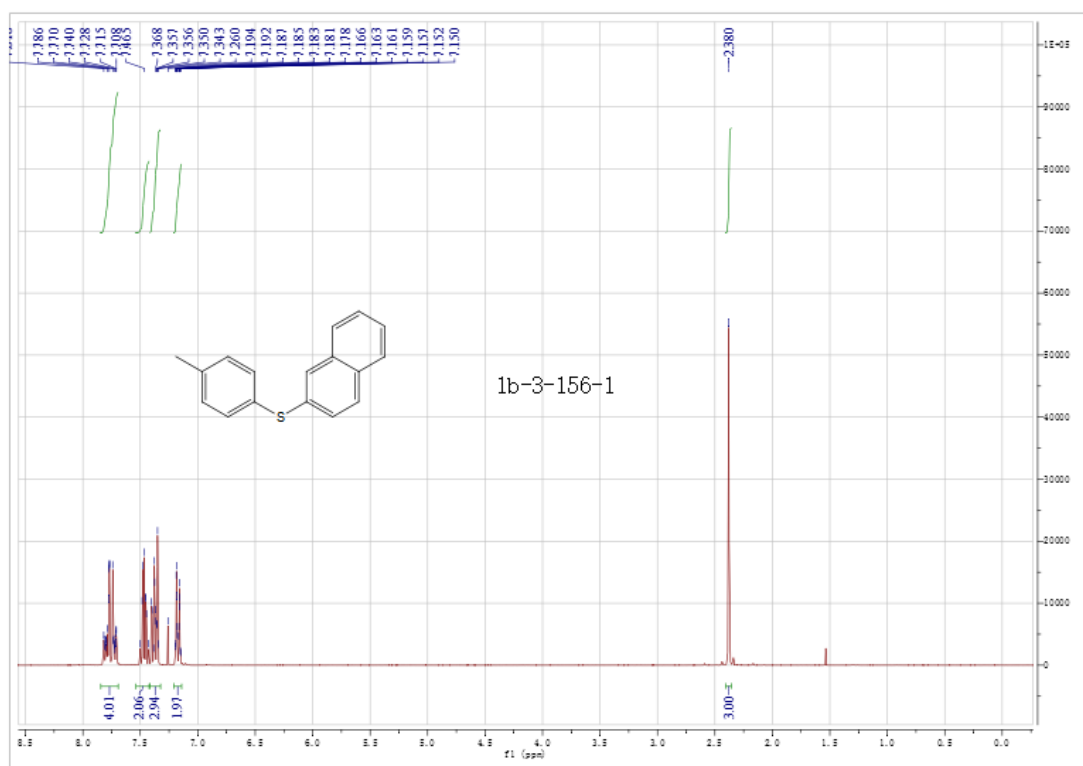

$^{13}\text{C}$  NMR (75 MHz,  $\text{CDCl}_3$ )

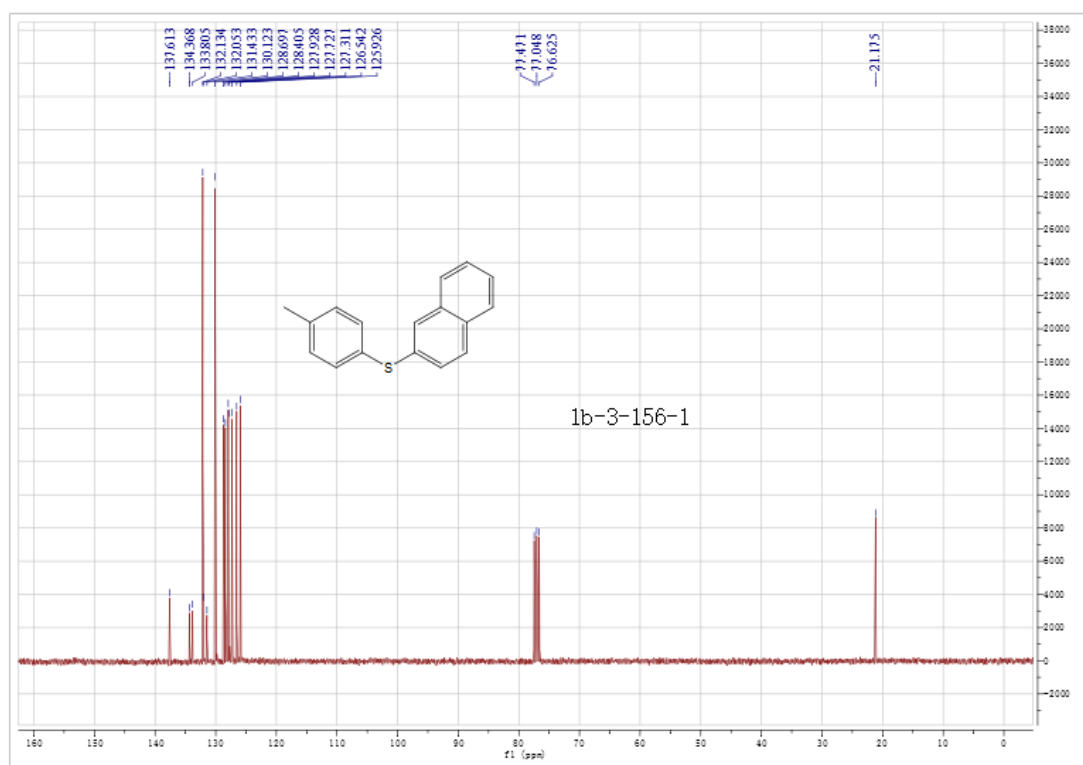



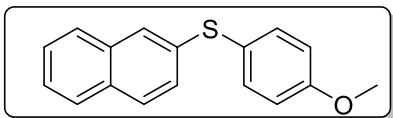

(4-Methoxyphenyl)(naphthalen-2-yl)sulfane (4r),  $^1\text{H}$  NMR (300 MHz,  $\text{CDCl}_3$ )

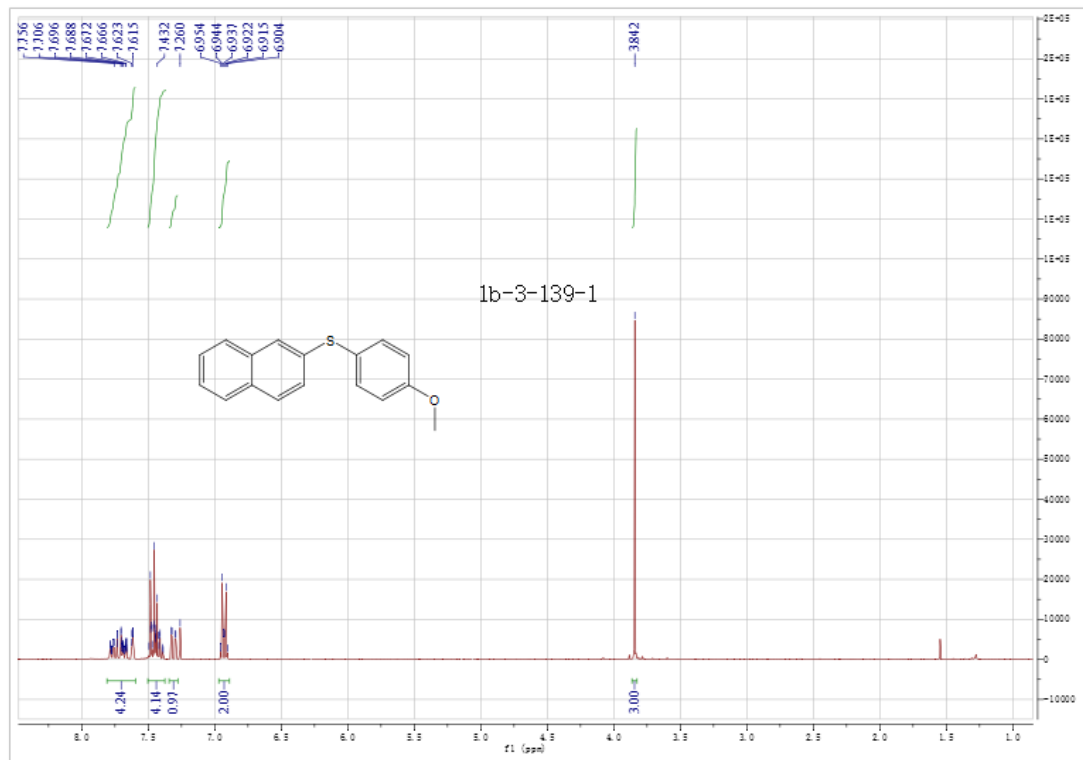

$^{13}\text{C}$  NMR (75 MHz,  $\text{CDCl}_3$ )

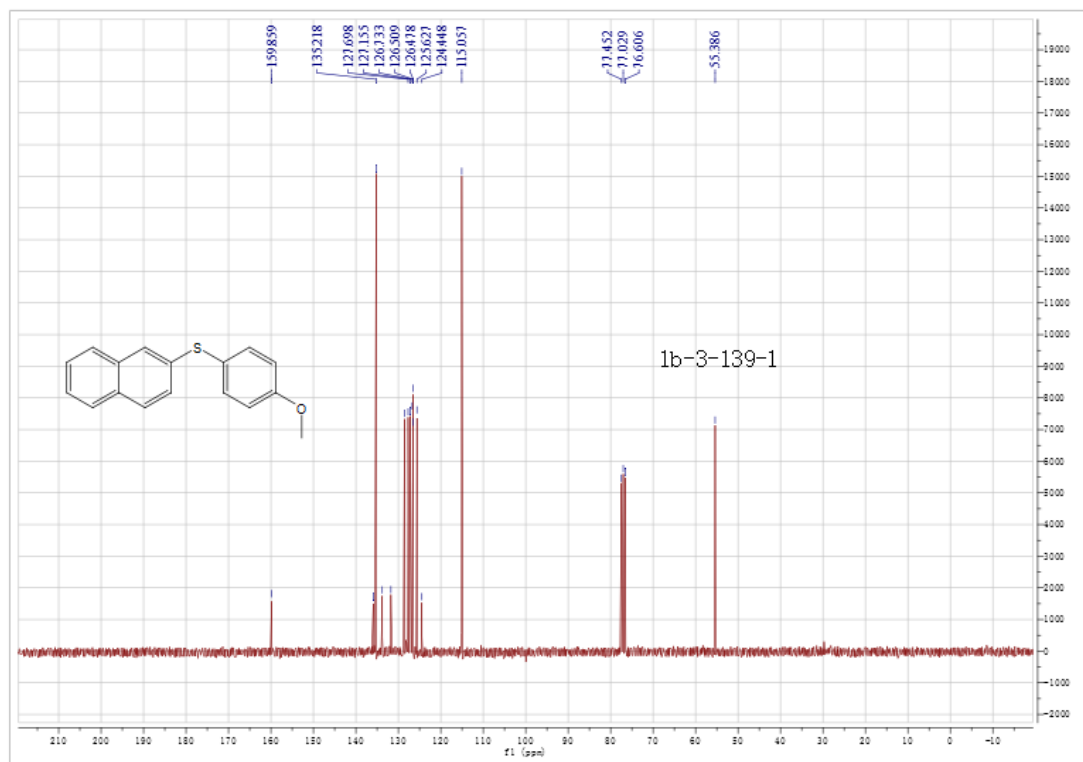

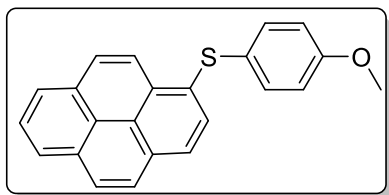

(4-Methoxyphenyl)(pyren-1-yl)sulfane (4s),  $^1\text{H}$  NMR (300 MHz,  $\text{CDCl}_3$ )

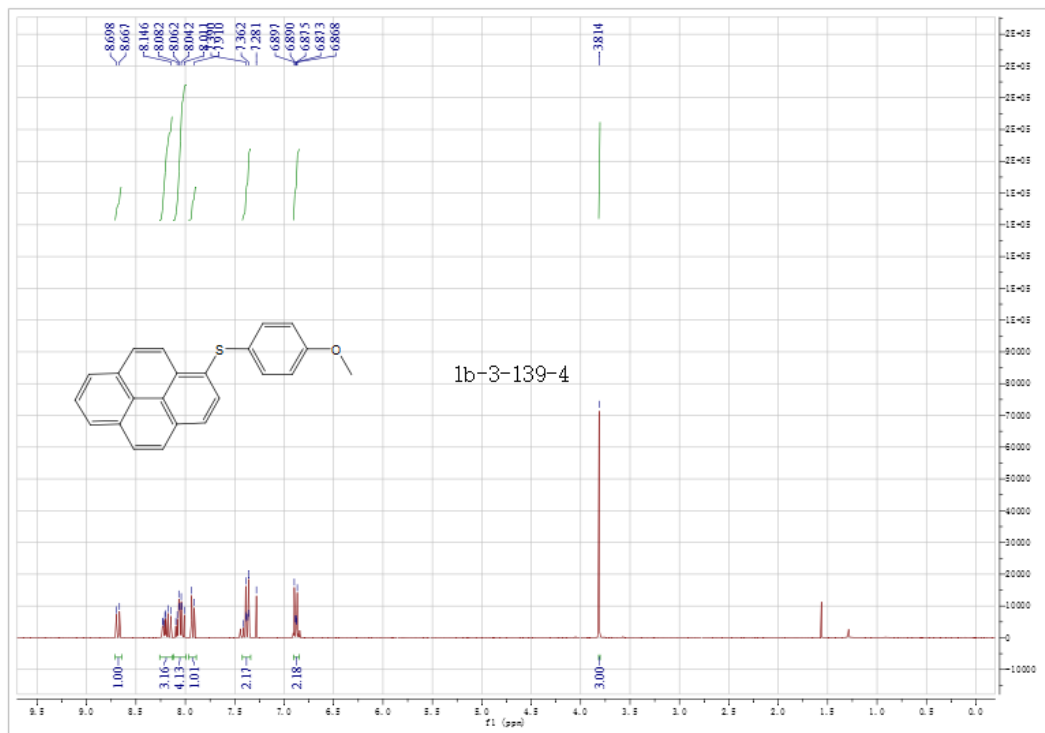

$^{13}\text{C}$  NMR (75 MHz,  $\text{CDCl}_3$ )

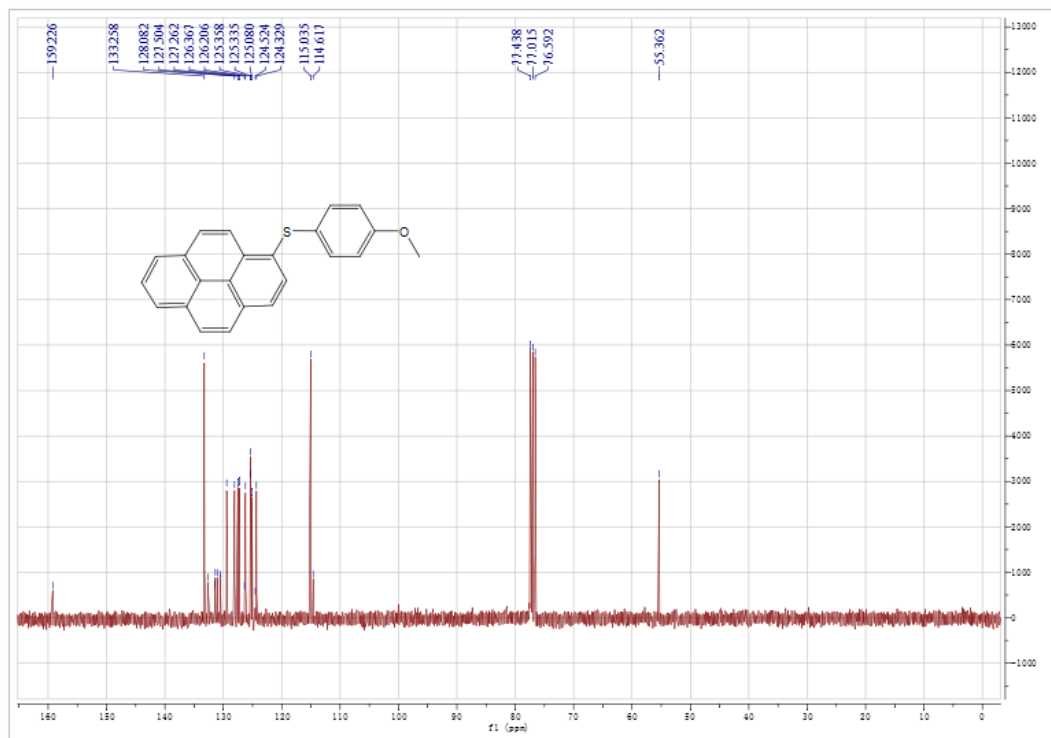

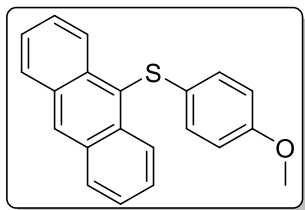

**Anthracen-9-yl(4-methoxyphenyl)sulfane (4t),  $^1\text{H}$  NMR (300 MHz,  $\text{CDCl}_3$ )**

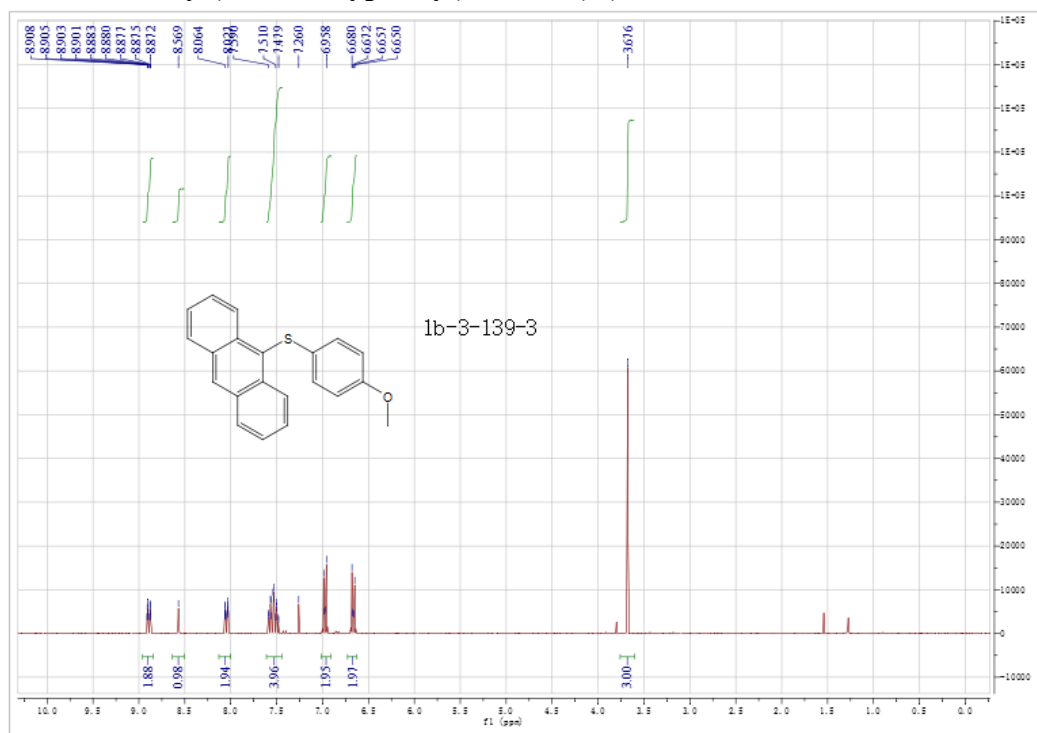

**$^{13}\text{C}$  NMR (75 MHz,  $\text{CDCl}_3$ )**

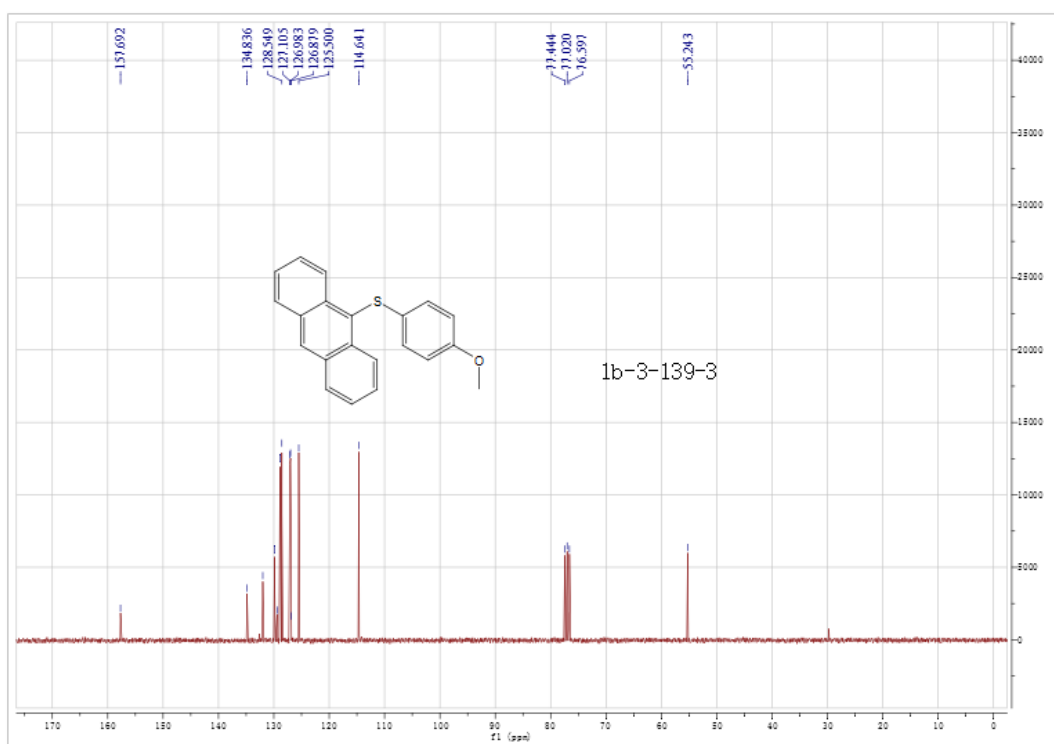

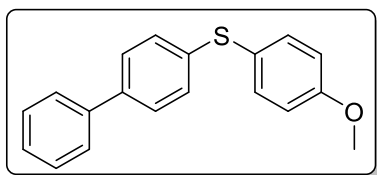

[1,1'-Biphenyl]-4-yl(4-methoxyphenyl)sulfane (4u),  $^1\text{H}$  NMR (300 MHz,  $\text{CDCl}_3$ )

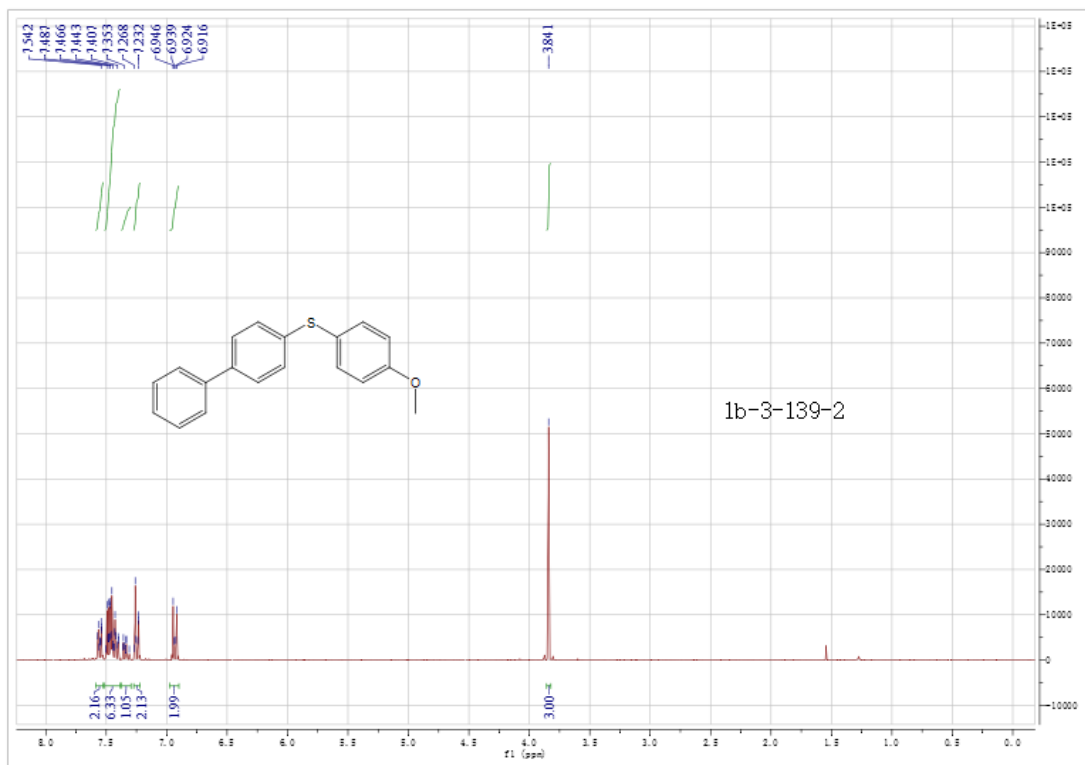

$^{13}\text{C}$  NMR (75 MHz,  $\text{CDCl}_3$ )

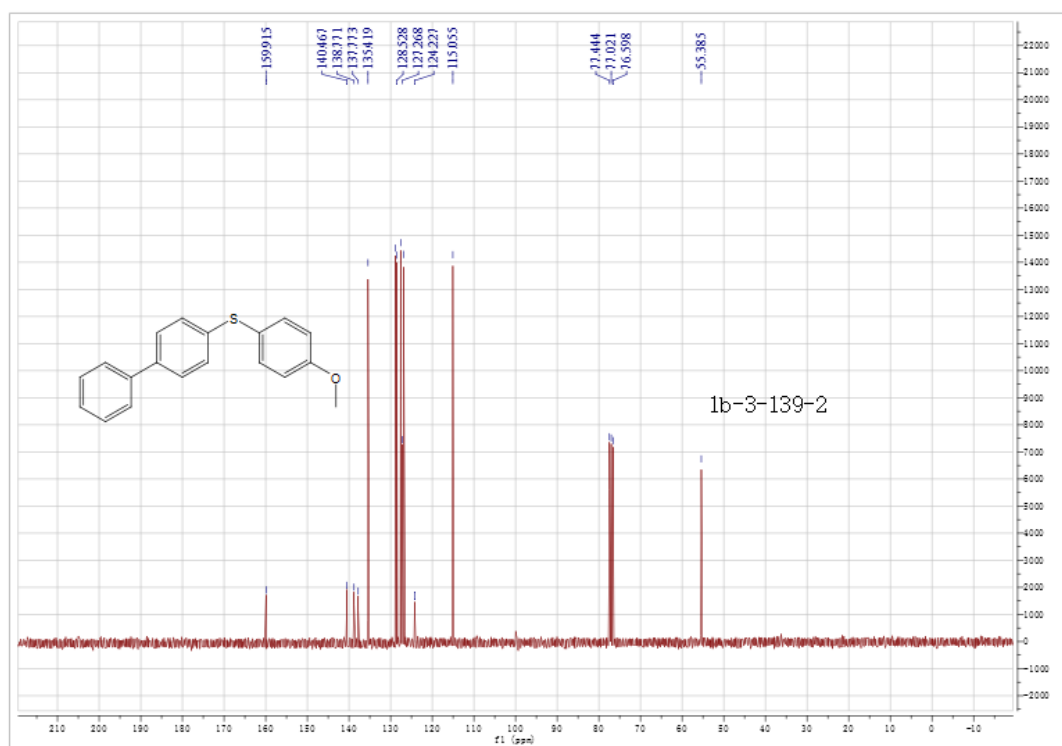

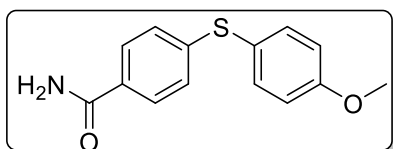

4-((4-Methoxyphenyl)thio)benzamide (4v),  $^1\text{H}$  NMR (300 MHz,  $d_6$ -DMSO)

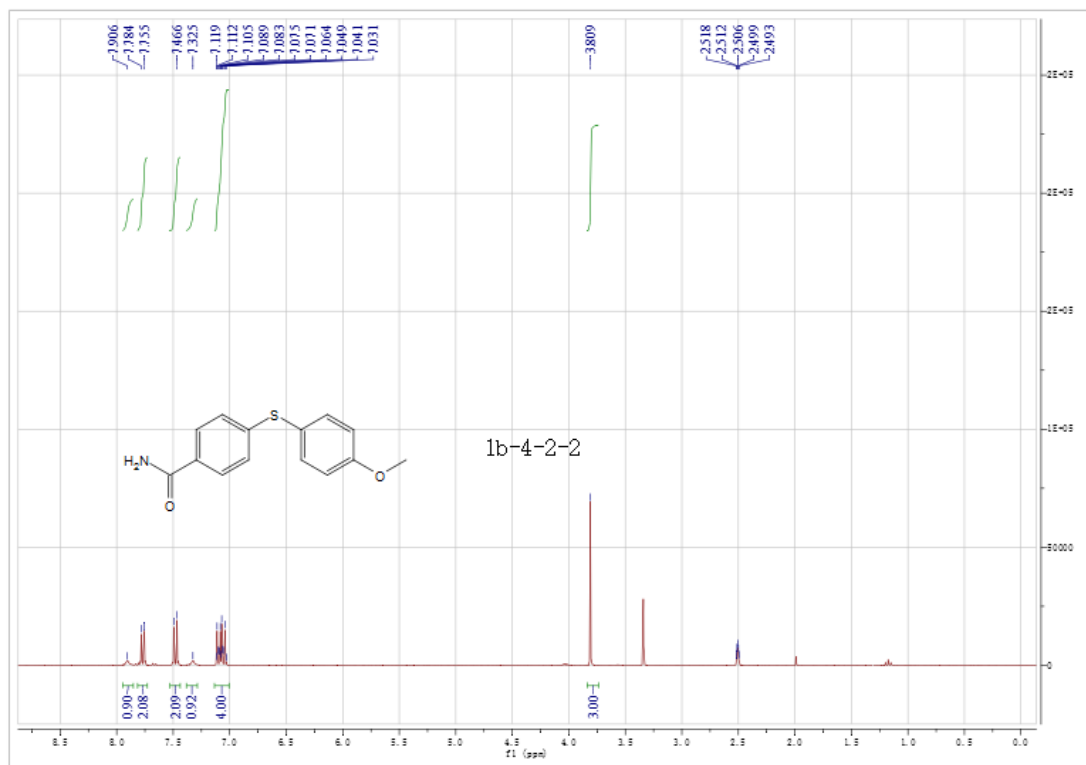

$^{13}\text{C}$  NMR (75 MHz,  $d_6$ -DMSO)

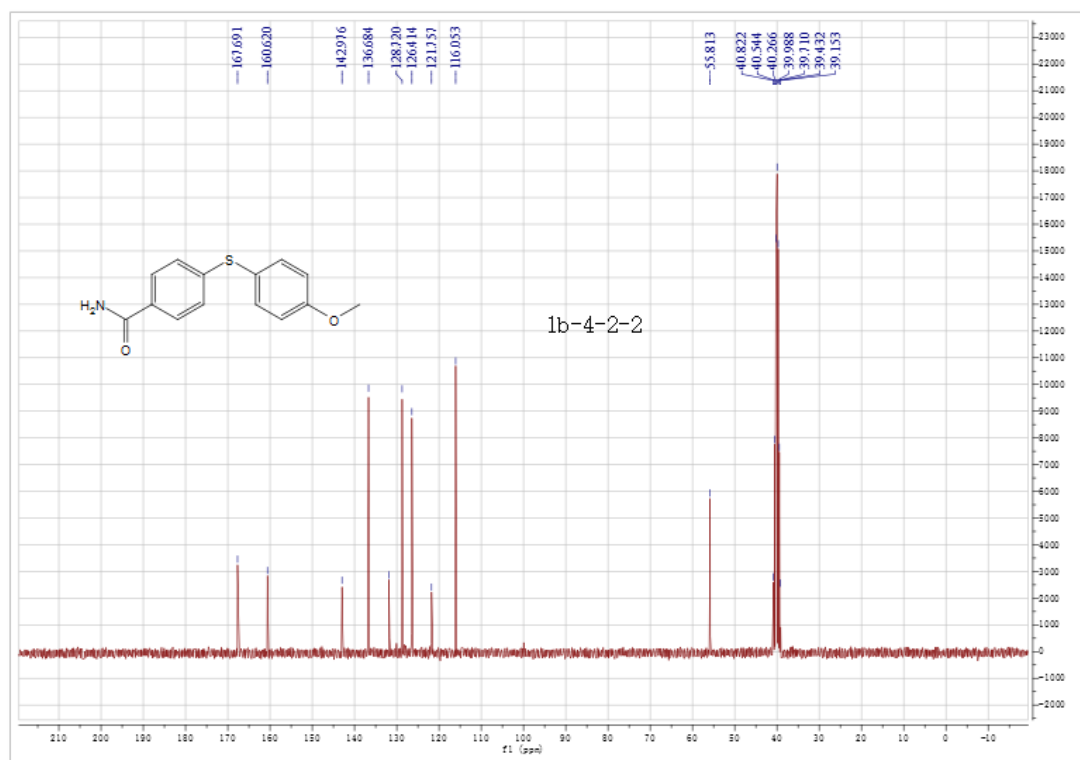

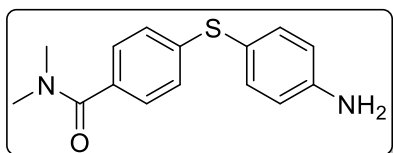

**4-((4-Aminophenyl)thio)-*N,N*-dimethylbenzamide (4w), <sup>1</sup>H NMR (300 MHz, CDCl<sub>3</sub>)**

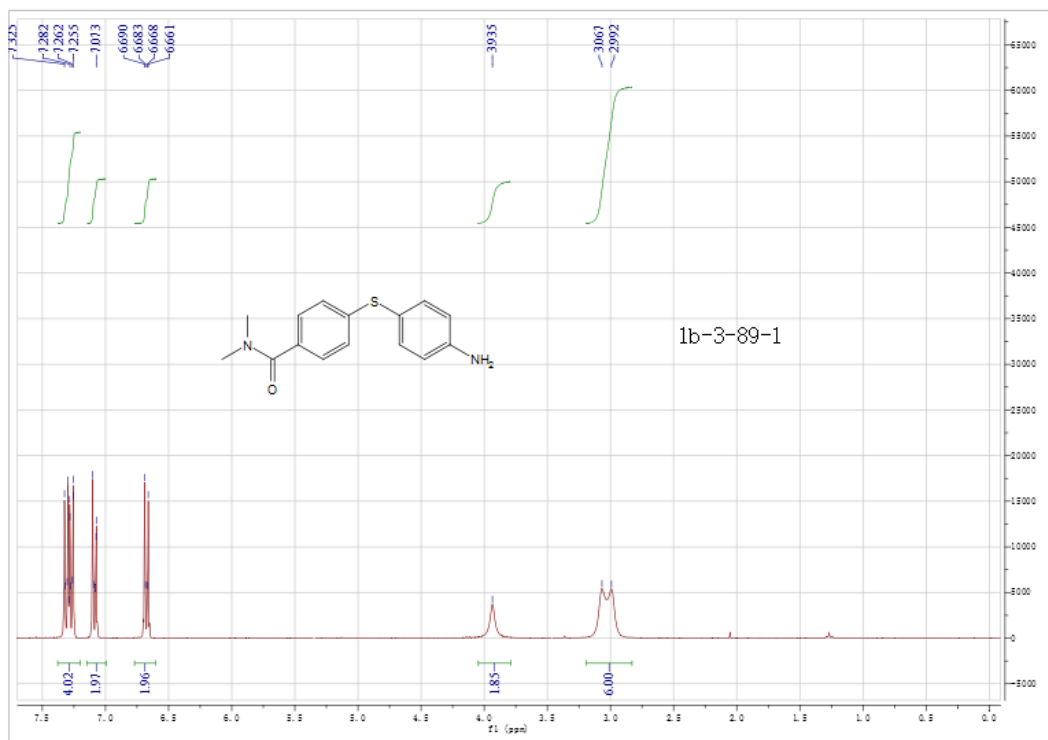

**<sup>13</sup>C NMR (75 MHz, CDCl<sub>3</sub>)**

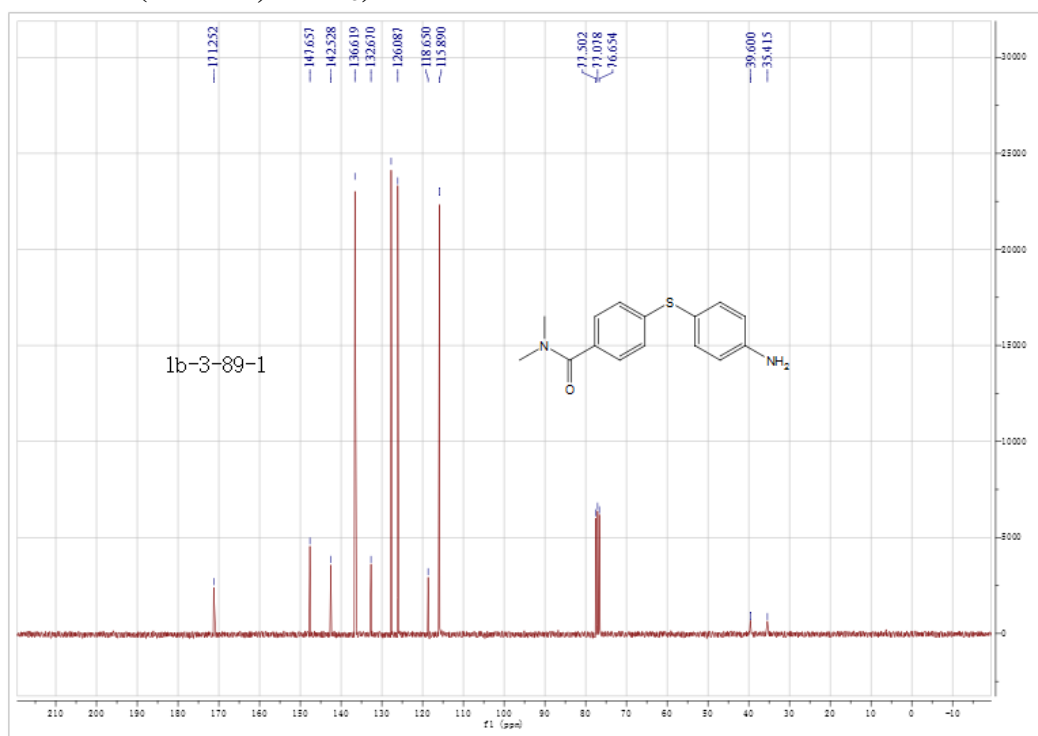

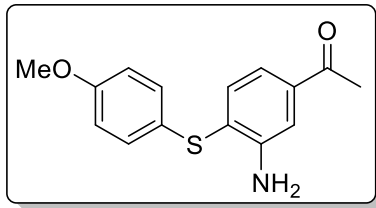

**1-(3-Amino-4-((4-methoxyphenyl)thio)phenyl)ethan-1-one (4x), <sup>1</sup>H NMR (400 MHz, CDCl<sub>3</sub>)**

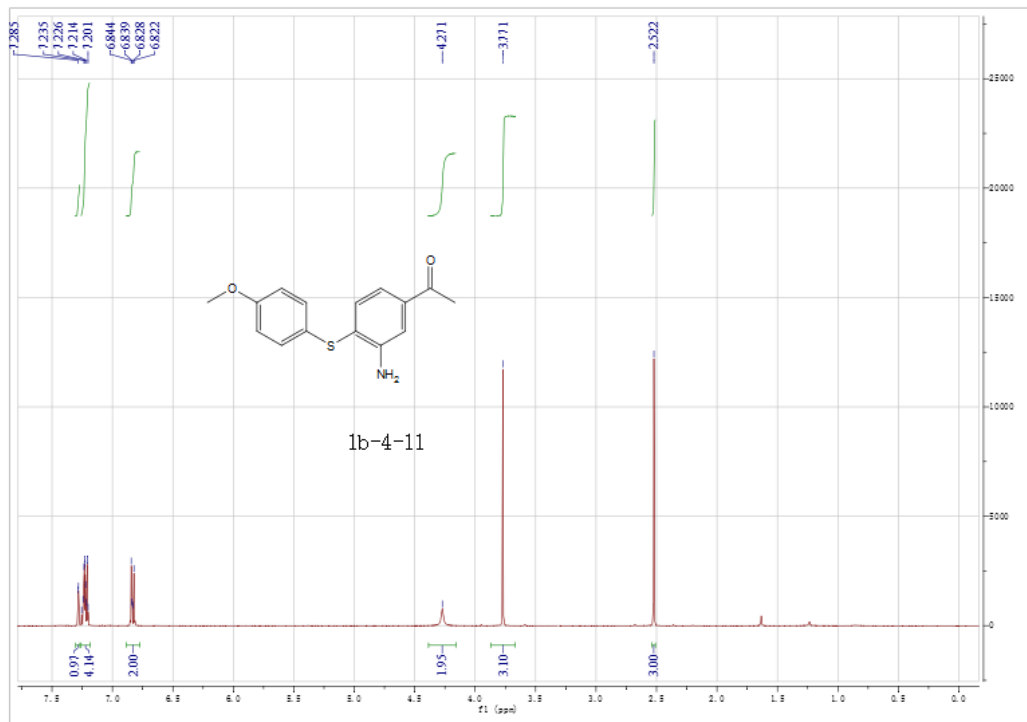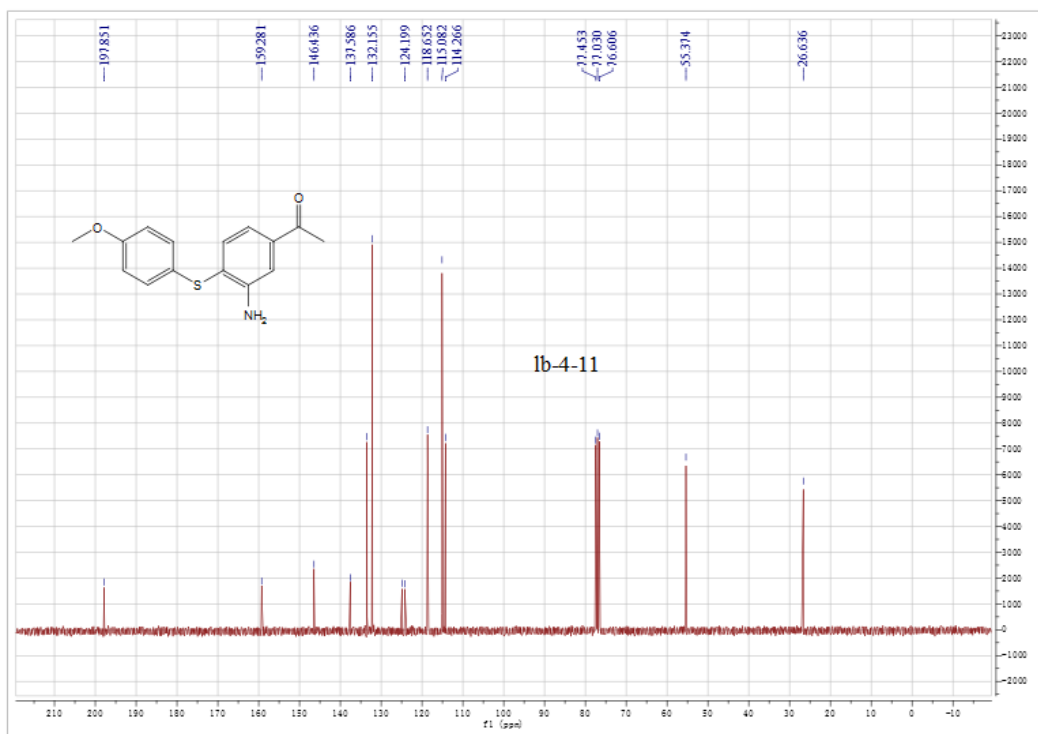

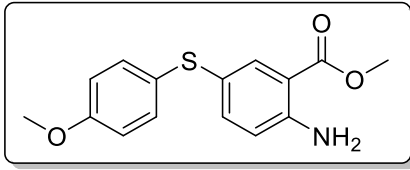

Methyl 2-amino-5-((4-methoxyphenyl)thio)benzoate (4y) ,  $^1\text{H}$  NMR (300 MHz,  $\text{CDCl}_3$ )

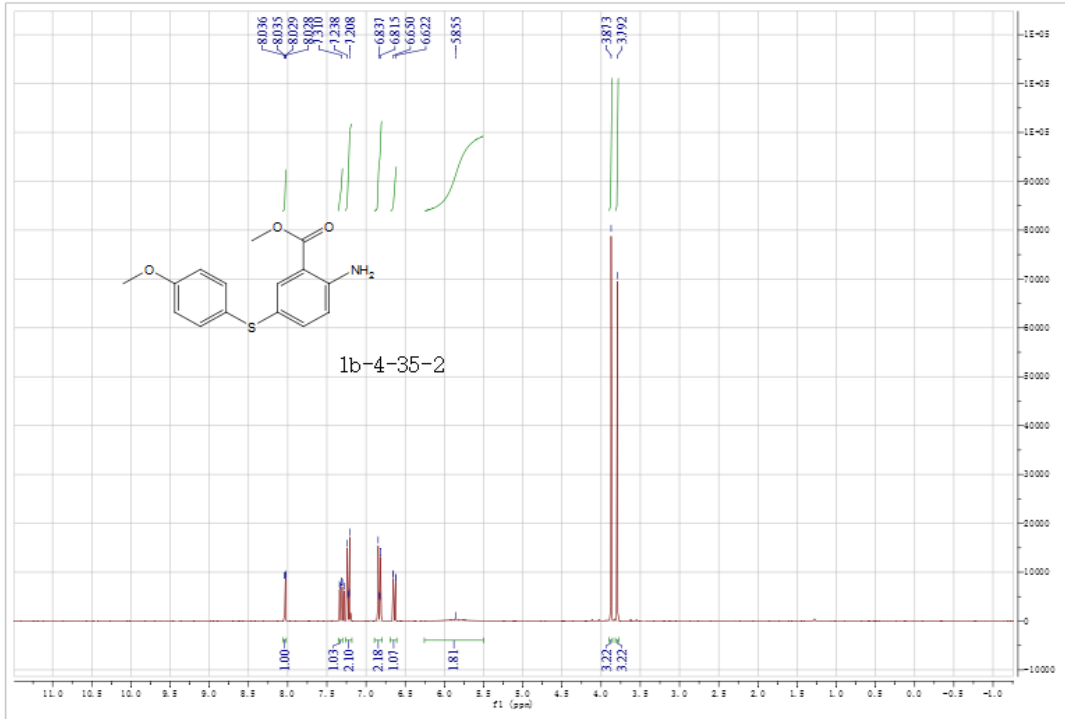

$^{13}\text{C}$  NMR (75 MHz,  $\text{CDCl}_3$ )

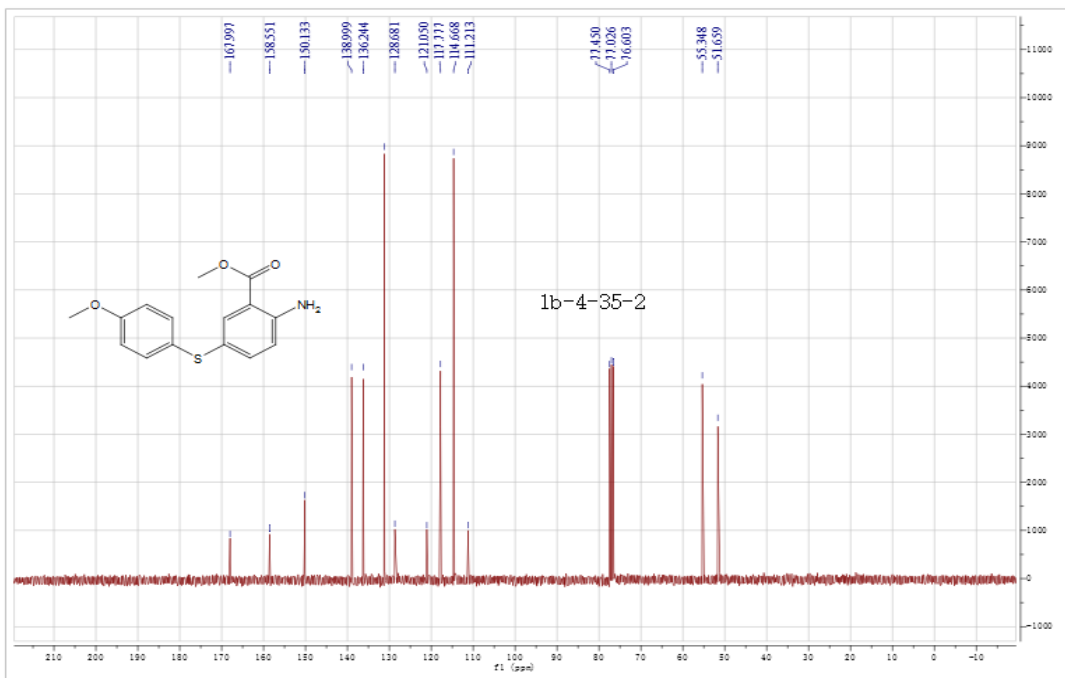



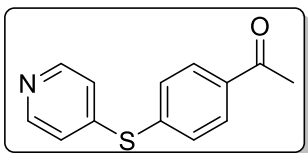

**1-(4-(Pyridin-4-ylthio)phenyl)ethan-1-one (5a),  $^1\text{H}$  NMR (300 MHz,  $\text{CDCl}_3$ )**

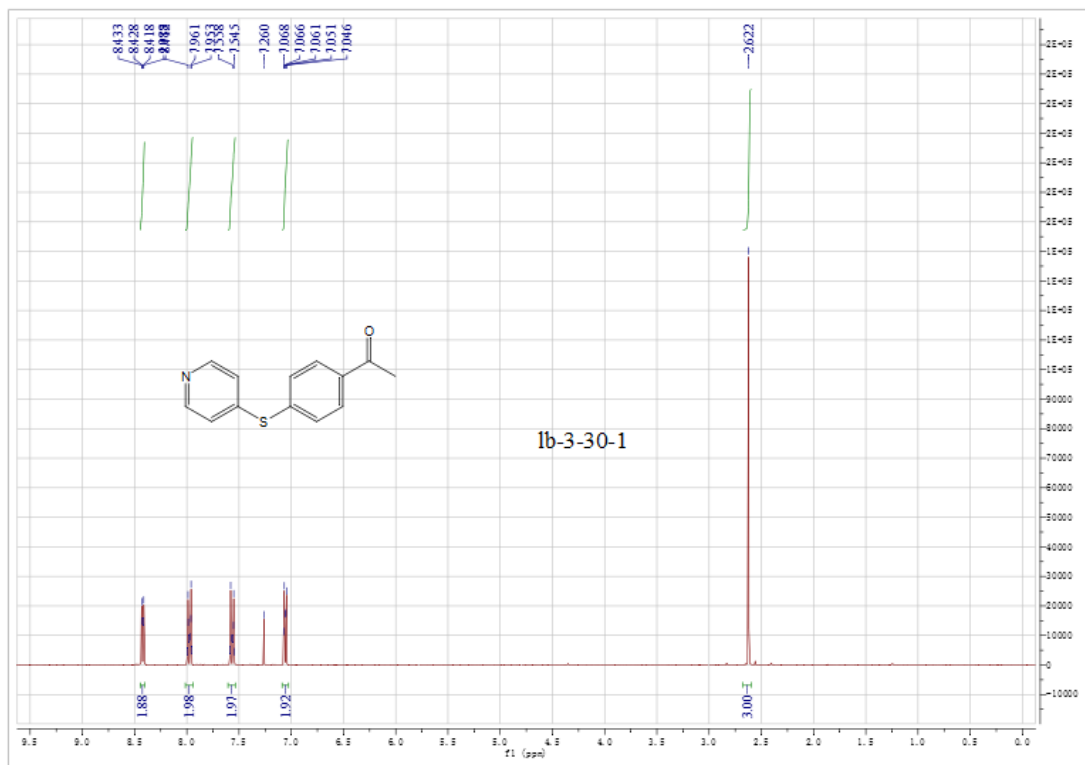

**$^{13}\text{C}$  NMR (75 MHz,  $\text{CDCl}_3$ )**

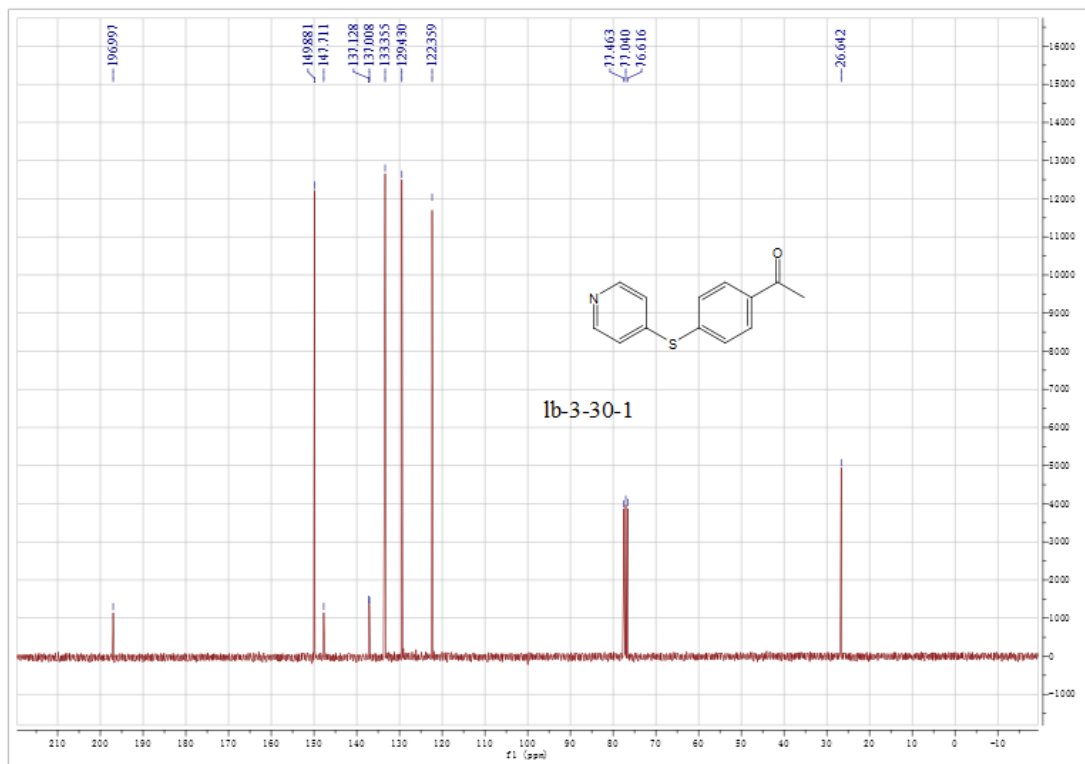

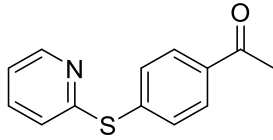

1-(4-(Pyridin-2-ylthio)phenyl)ethan-1-one (5b),  $^1\text{H}$  NMR (300 MHz,  $\text{CDCl}_3$ )

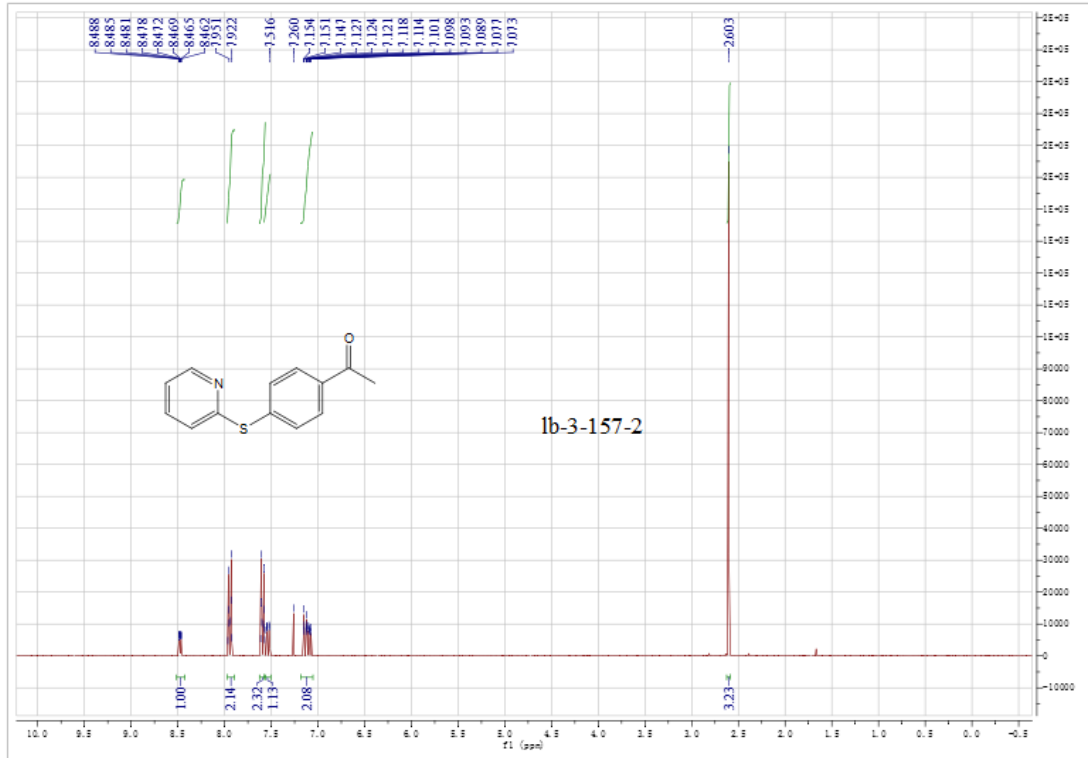

$^{13}\text{C}$  NMR (75 MHz,  $\text{CDCl}_3$ )

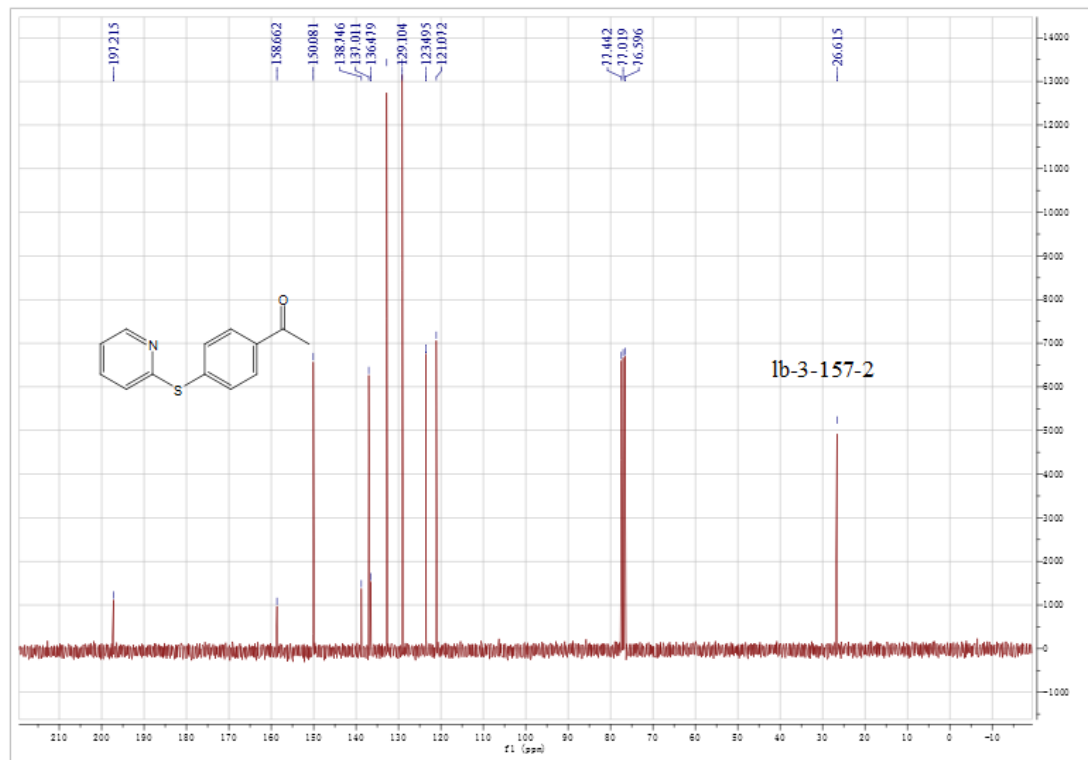

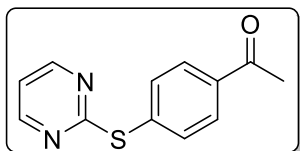

1-(4-(Pyrimidin-2-ylthio)phenyl)ethan-1-one (5c),  $^1\text{H}$  NMR (300 MHz,  $\text{CDCl}_3$ )

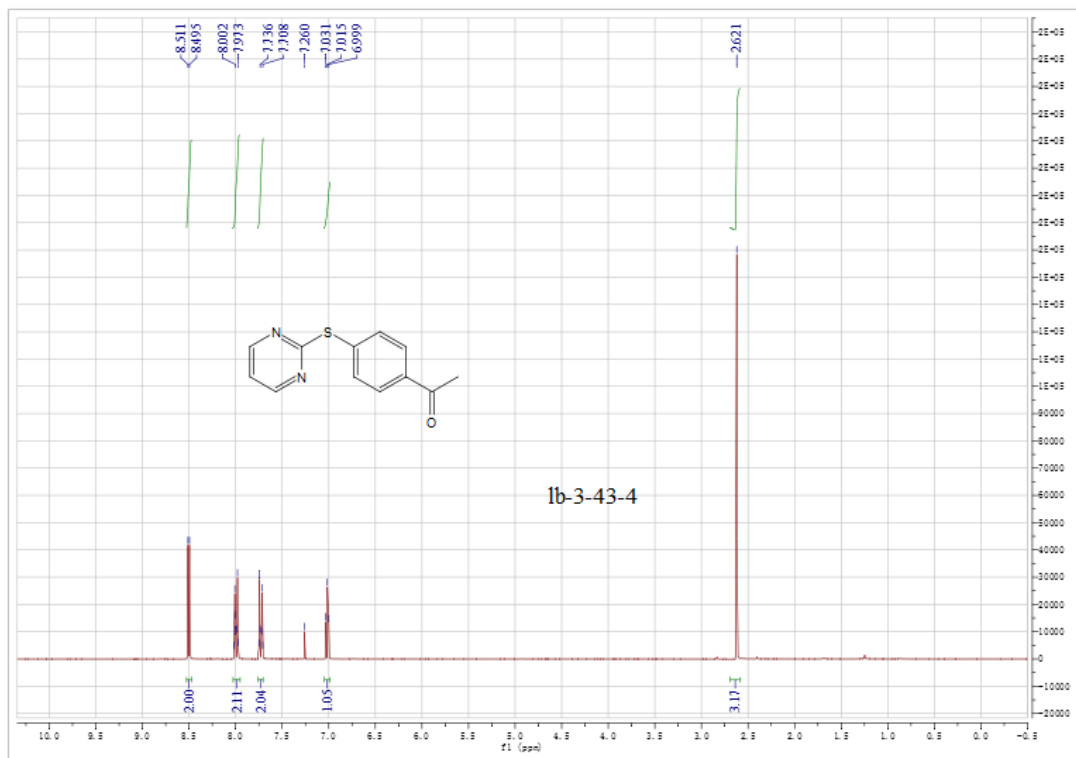

$^{13}\text{C}$  NMR (75 MHz,  $\text{CDCl}_3$ )

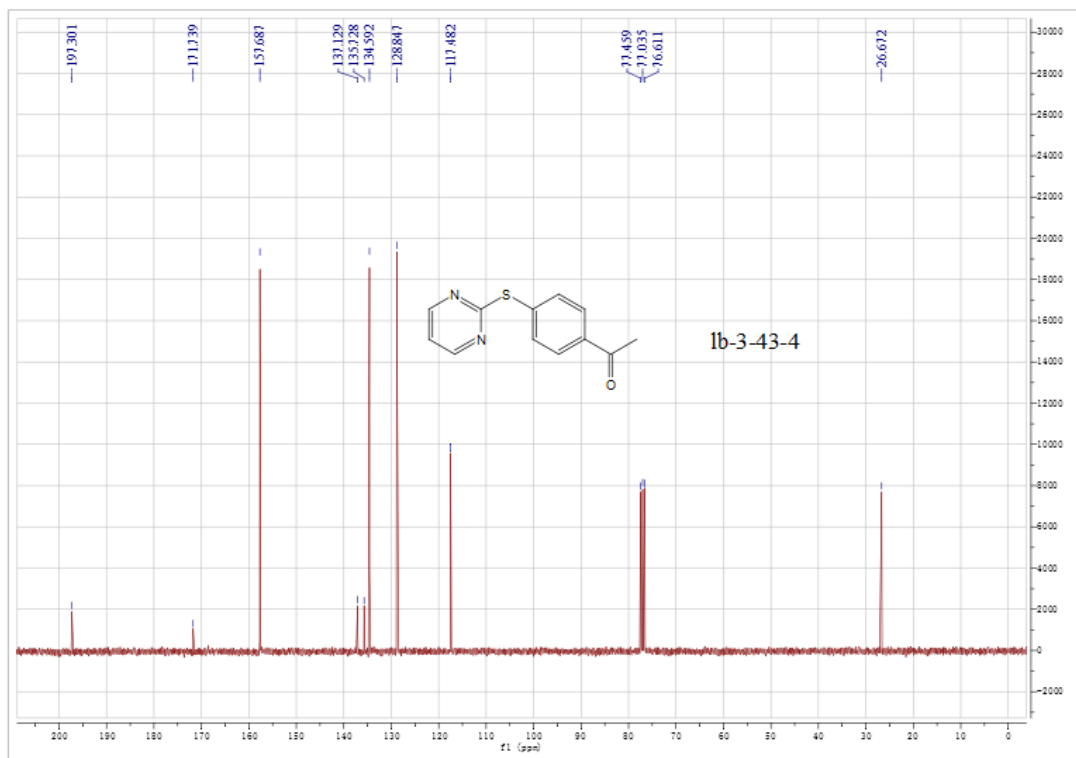

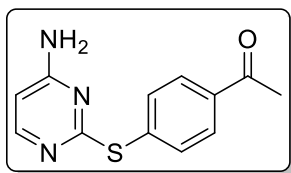

**1-(4-((4-Aminopyrimidin-2-yl)thio)phenyl)ethan-1-one (5d),  $^1\text{H}$  NMR (300 MHz,  $d_6$ -DMSO)**

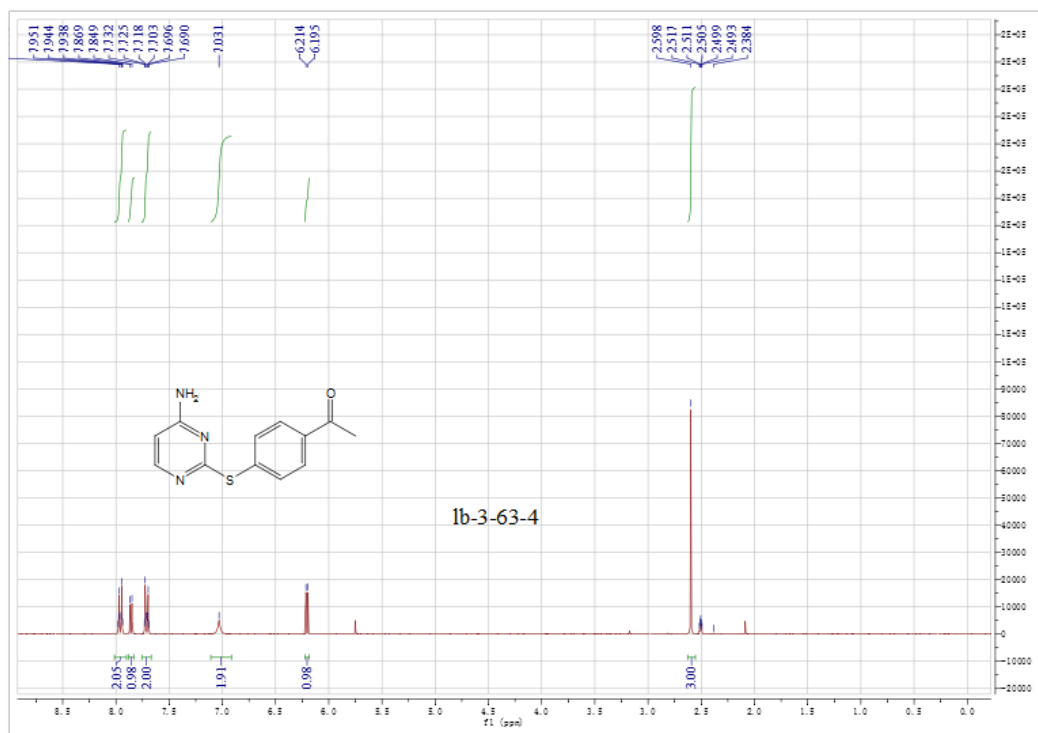

**$^{13}\text{C}$  NMR (75 MHz,  $d_6$ -DMSO)**

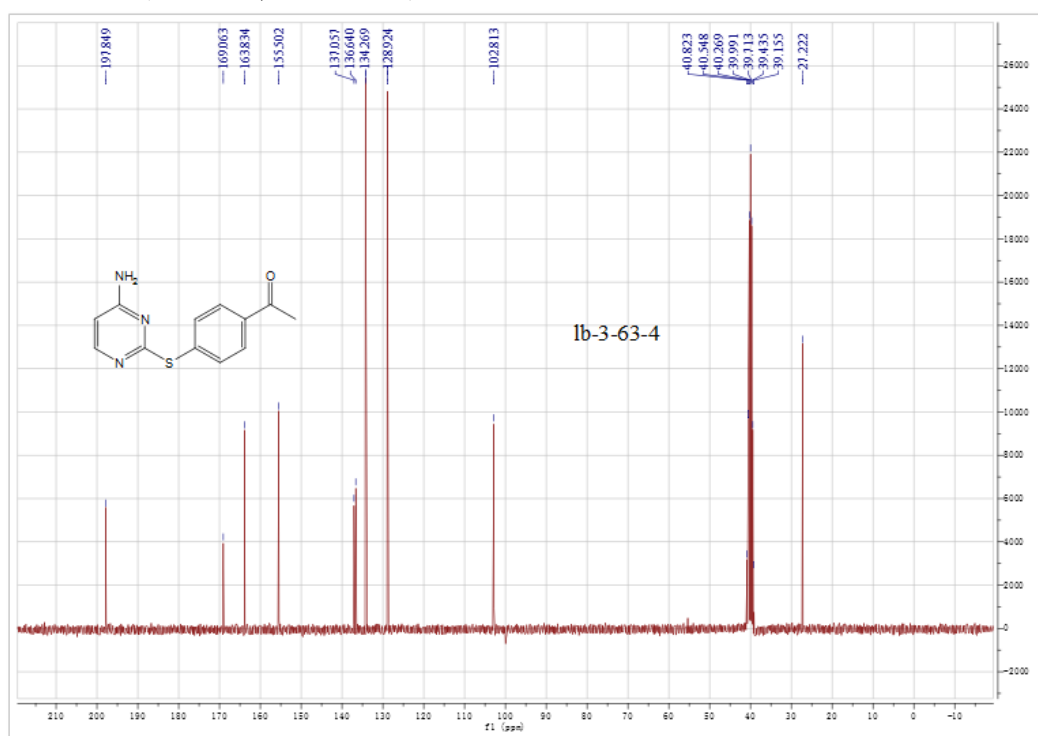

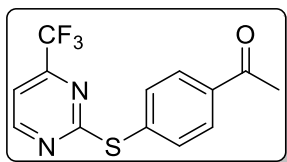

**1-(4-((4-(Trifluoromethyl)pyrimidin-2-yl)thio)phenyl)ethan-1-one (5e),  $^1\text{H}$  NMR (300 MHz,  $\text{CDCl}_3$ )**

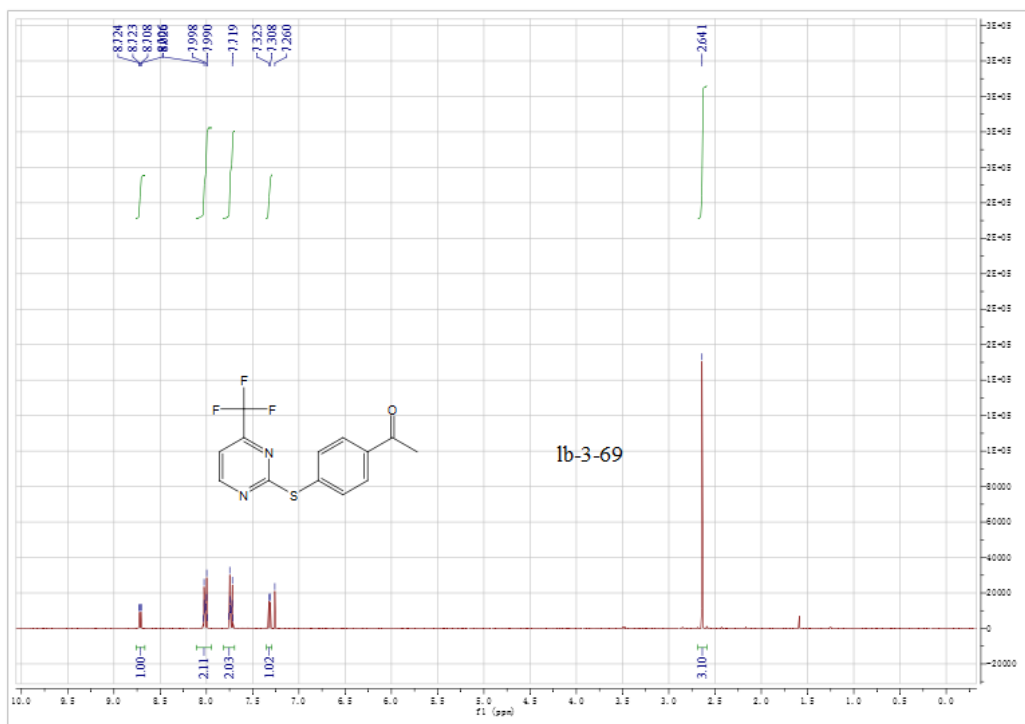

**$^{13}\text{C}$  NMR (75 MHz,  $\text{CDCl}_3$ )**

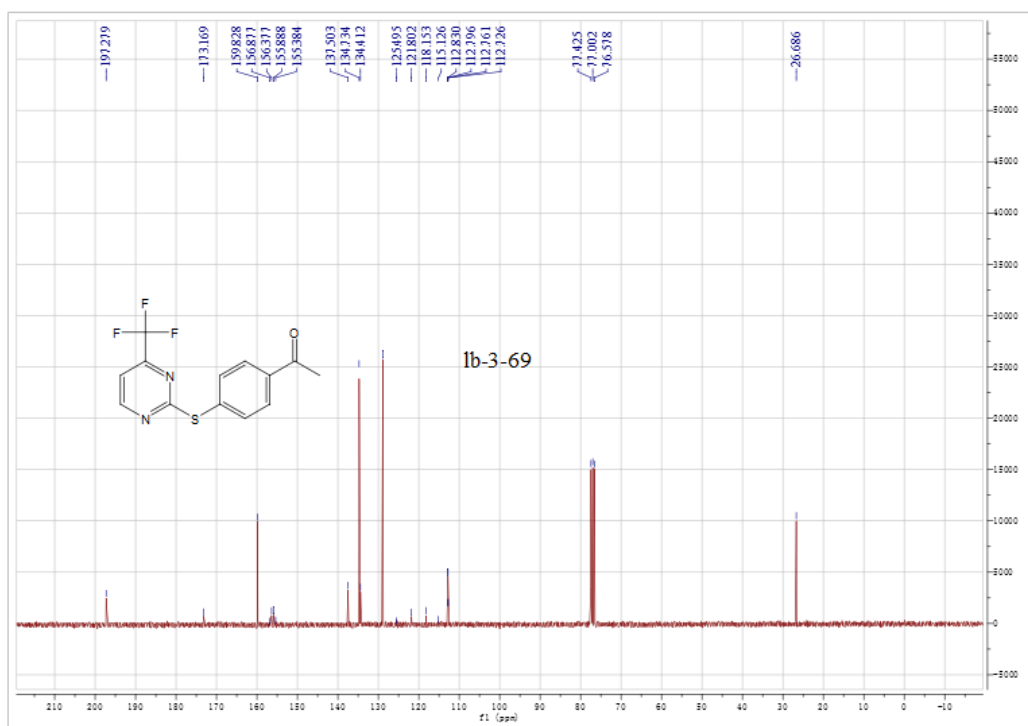

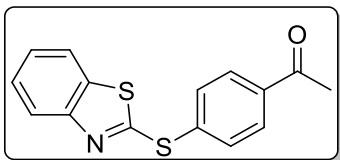

**1-(4-(Benzo[d]thiazol-2-ylthio)phenyl)ethan-1-one (5f),  $^1\text{H}$  NMR (300 MHz,  $\text{CDCl}_3$ )**

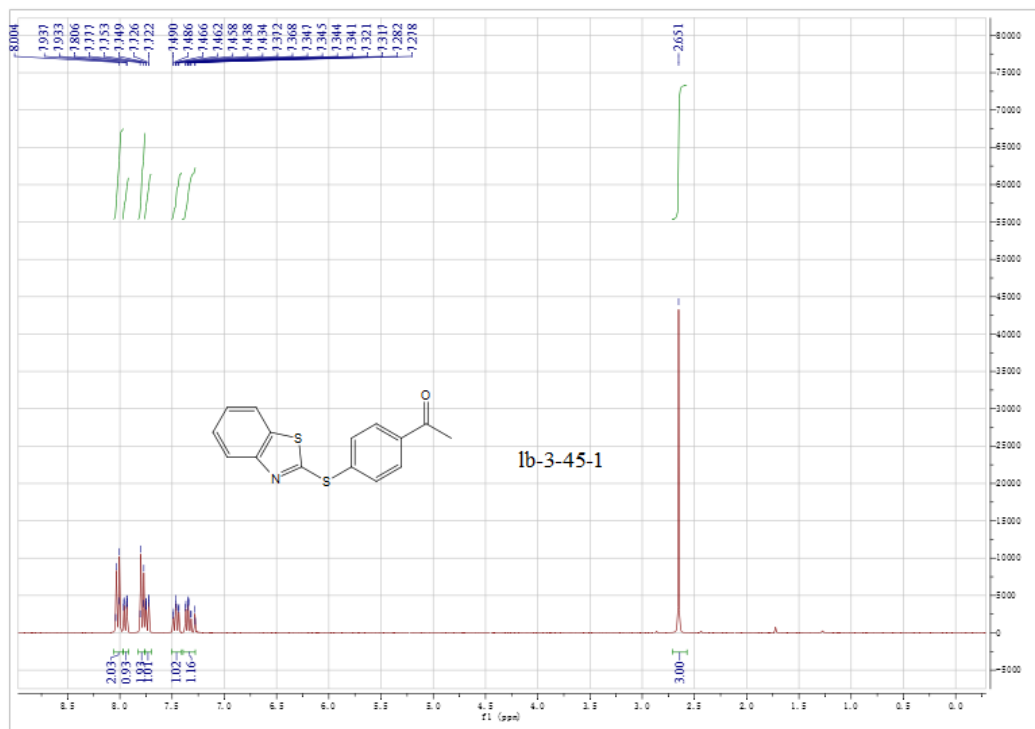

**$^{13}\text{C}$  NMR (75 MHz,  $\text{CDCl}_3$ )**

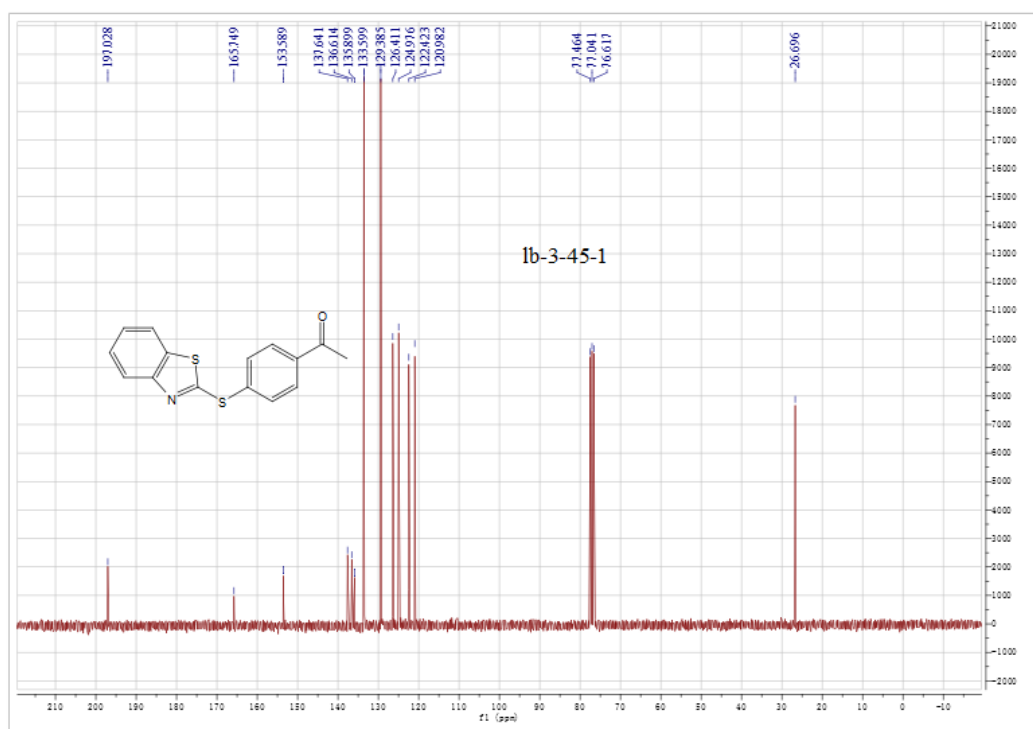

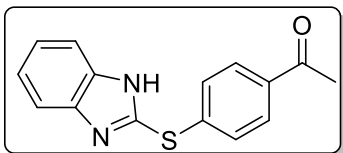

**1-(4-((1H-benzo[d]imidazol-2-yl)thio)phenyl)ethan-1-one (5g),  $^1\text{H}$  NMR (300 MHz,  $\text{CDCl}_3$ )**

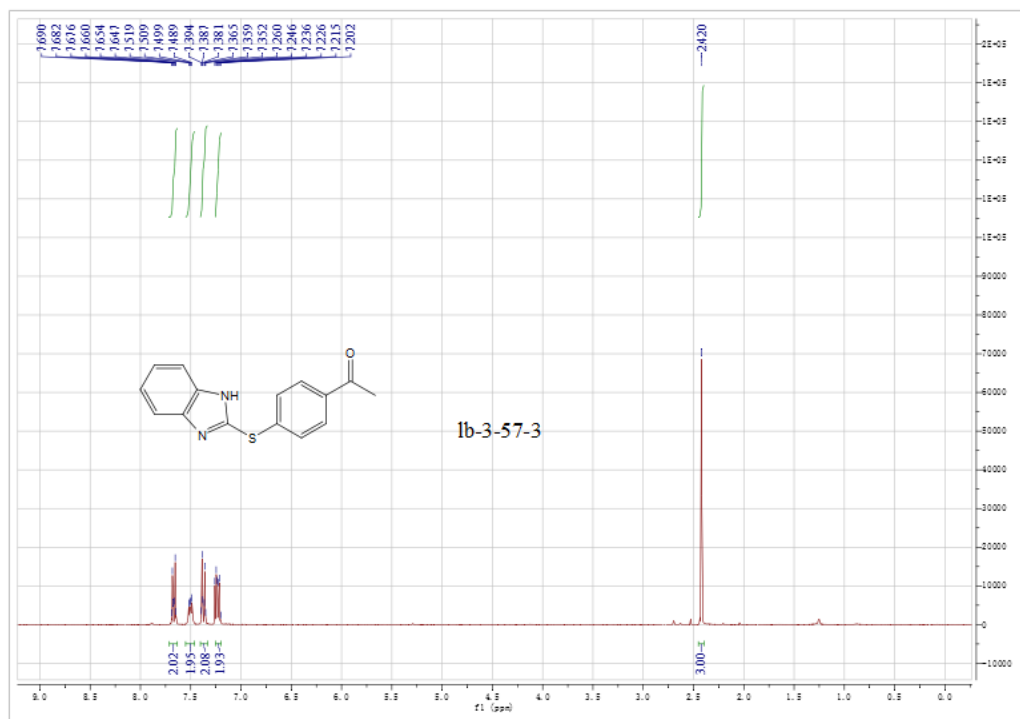

**$^{13}\text{C}$  NMR (75 MHz,  $\text{CDCl}_3$ )**

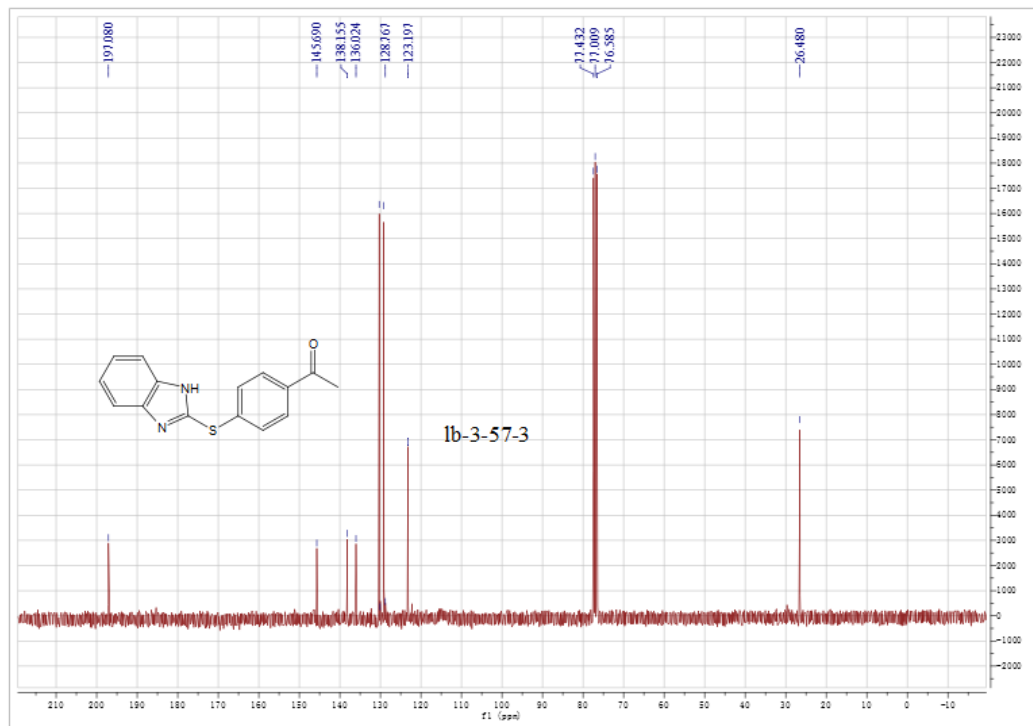

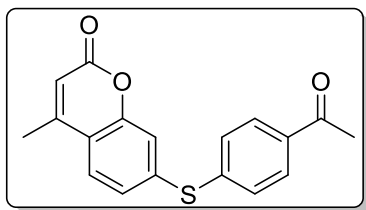

7-((4-Acetylphenyl)thio)-4-methyl-2H-chromen-2-one (5h),  $^1\text{H}$  NMR (300 MHz,  $\text{CDCl}_3$ )

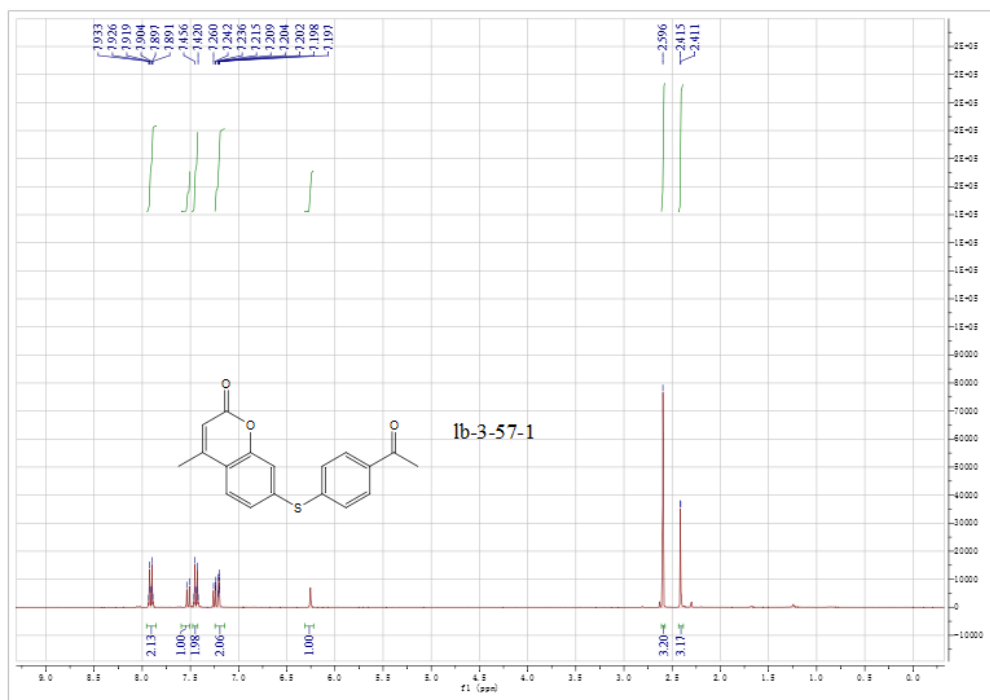

$^{13}\text{C}$  NMR (75 MHz,  $\text{CDCl}_3$ )

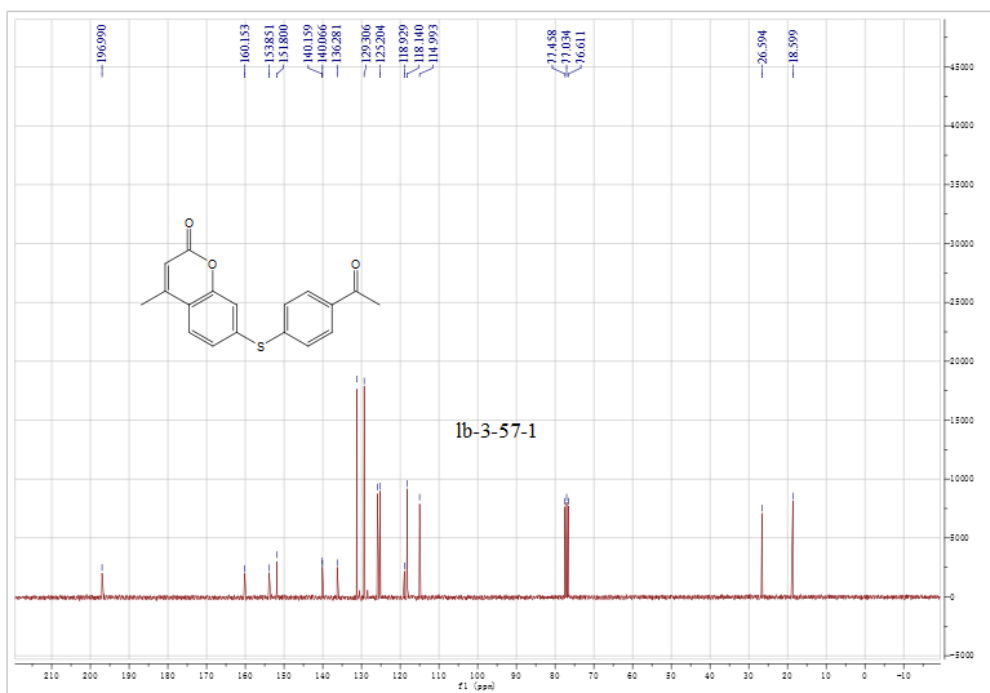



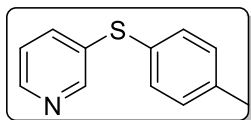

**3-(*p*-Tolylthio)pyridine (5i), <sup>1</sup>H NMR (300 MHz, CDCl<sub>3</sub>)**

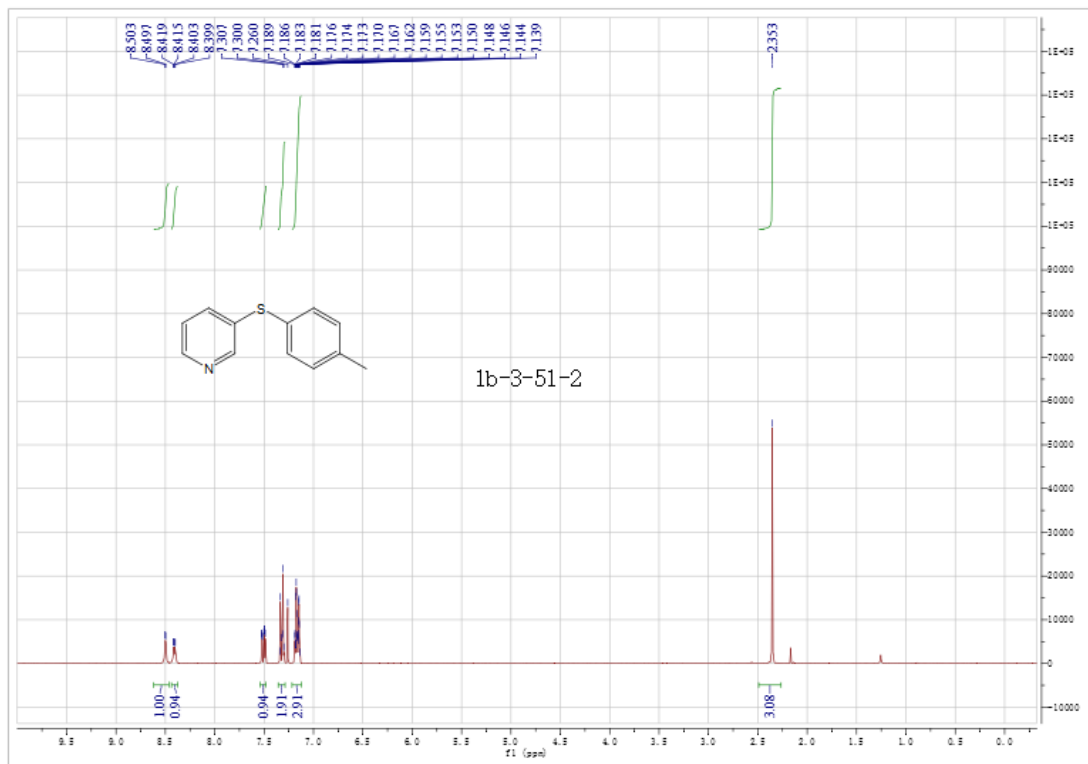

**<sup>13</sup>C NMR (75 MHz, CDCl<sub>3</sub>)**

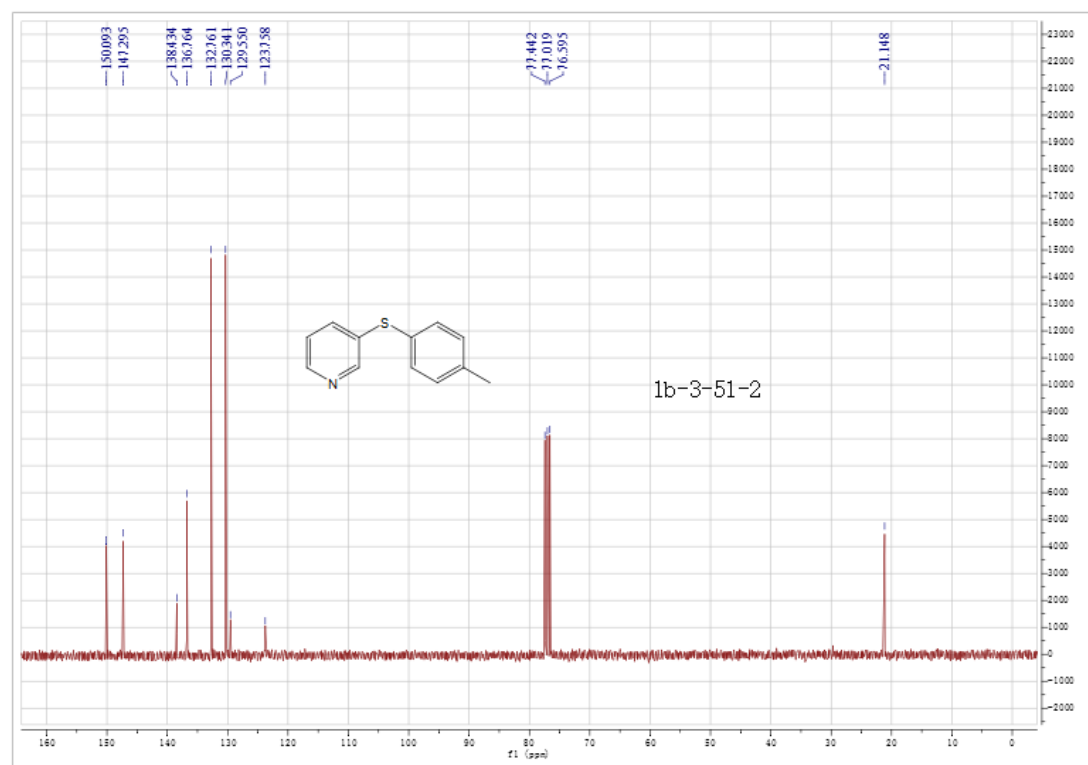

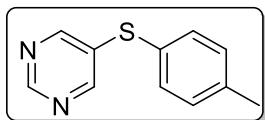

**5-(*p*-Tolylthio)pyrimidine (5j), <sup>1</sup>H NMR (300 MHz, CDCl<sub>3</sub>)**

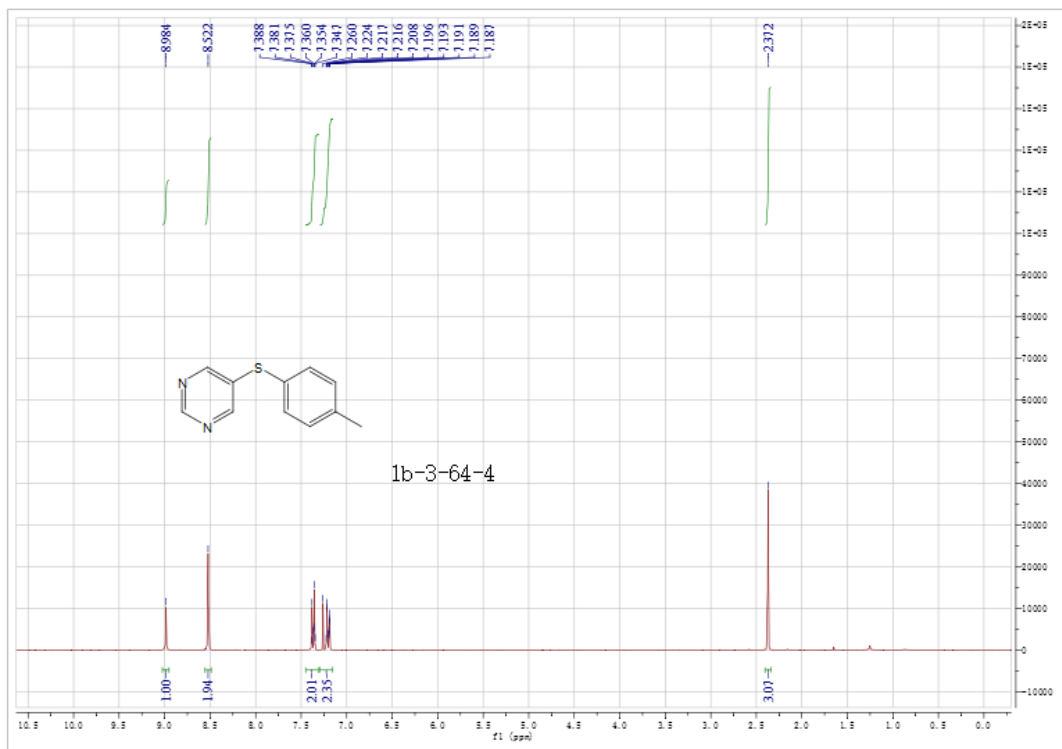

**<sup>13</sup>C NMR (75 MHz, CDCl<sub>3</sub>)**

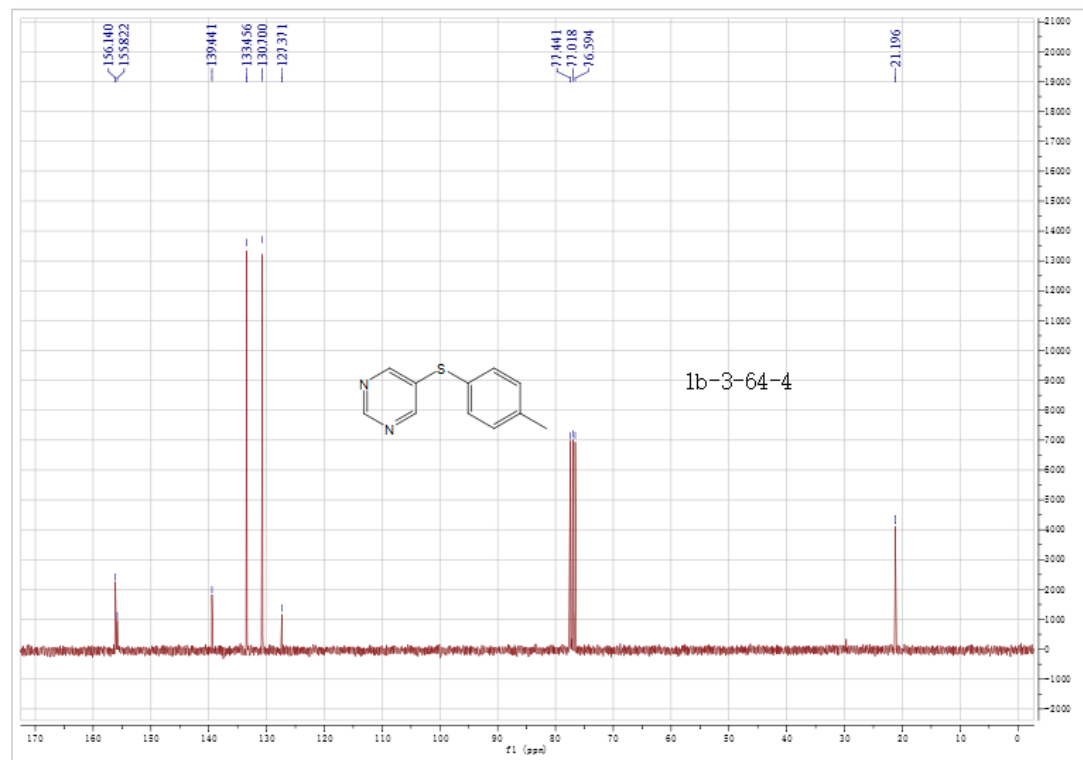

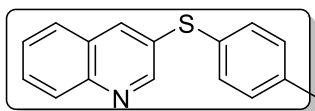

3-(p-Tolylthio)quinolone (5k),  $^1\text{H}$  NMR (300 MHz,  $\text{CDCl}_3$ )

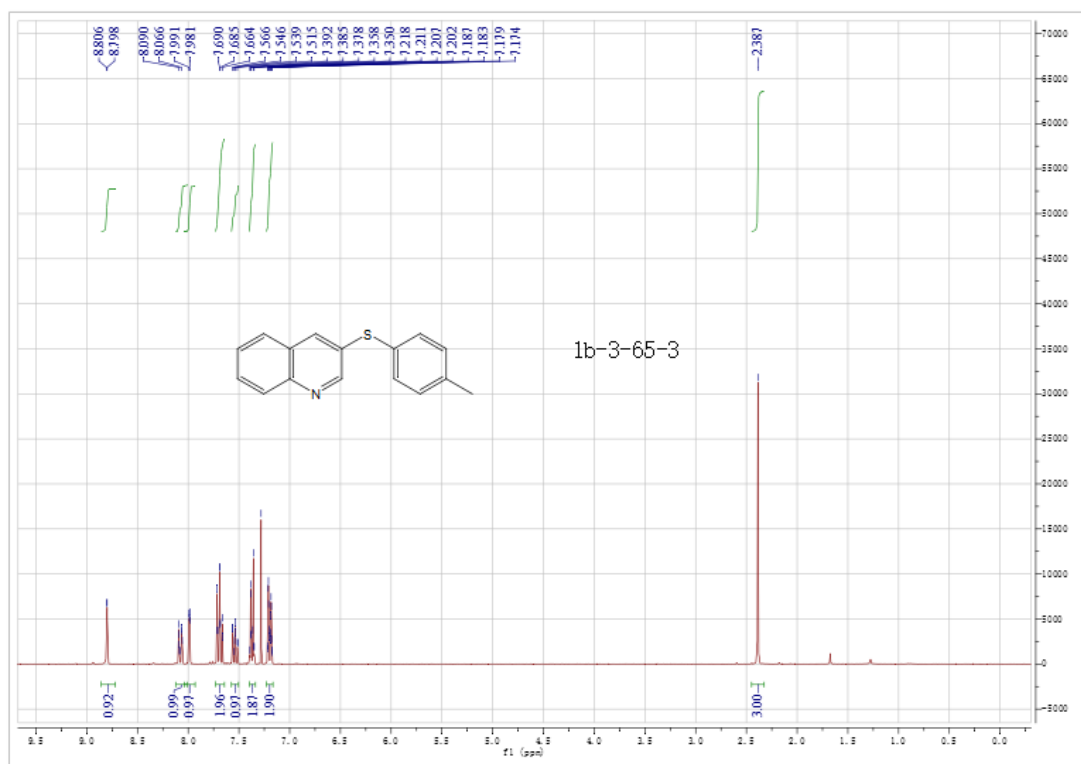

$^{13}\text{C}$  NMR (75 MHz,  $\text{CDCl}_3$ )

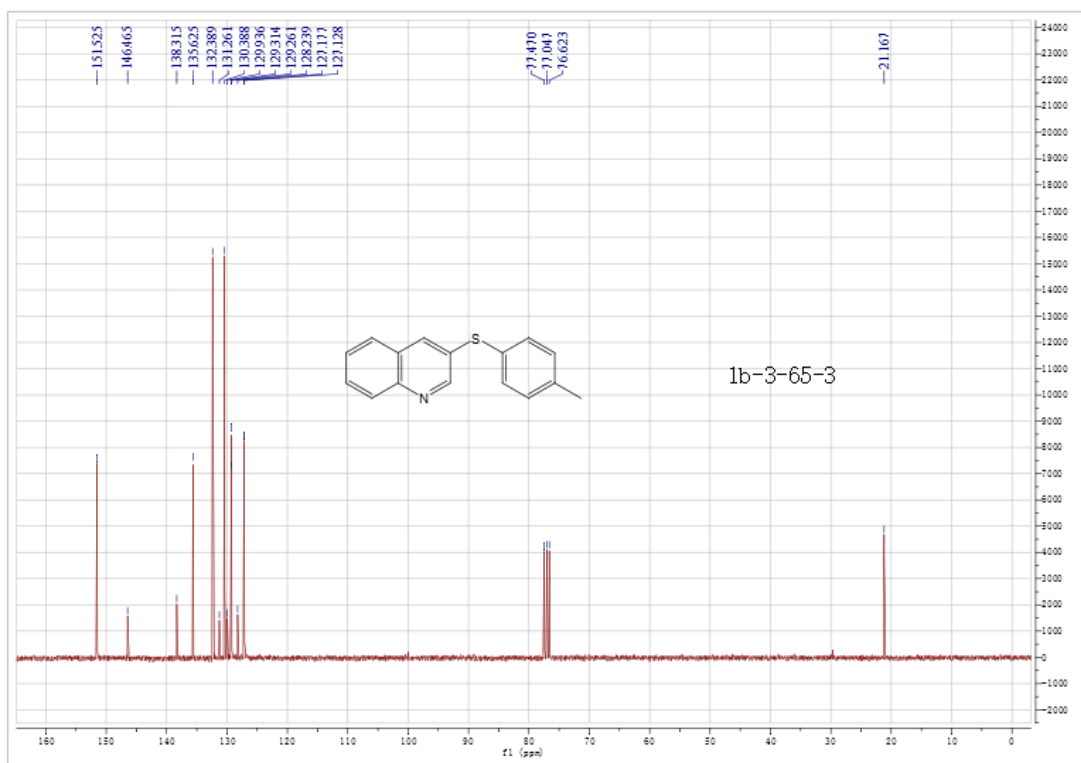

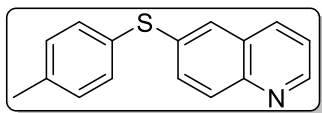

6-(*p*-Tolylthio)quinolone (5l),  $^1\text{H}$  NMR (300 MHz,  $\text{CDCl}_3$ )

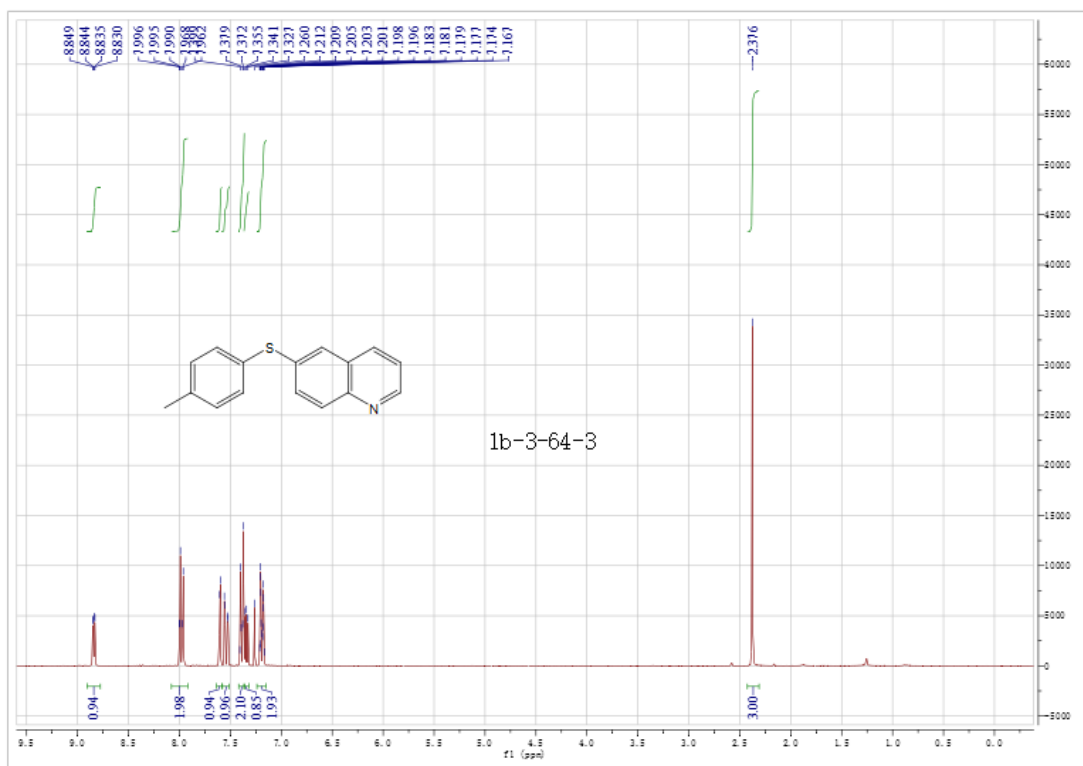

$^{13}\text{C}$  NMR (75 MHz,  $\text{CDCl}_3$ )

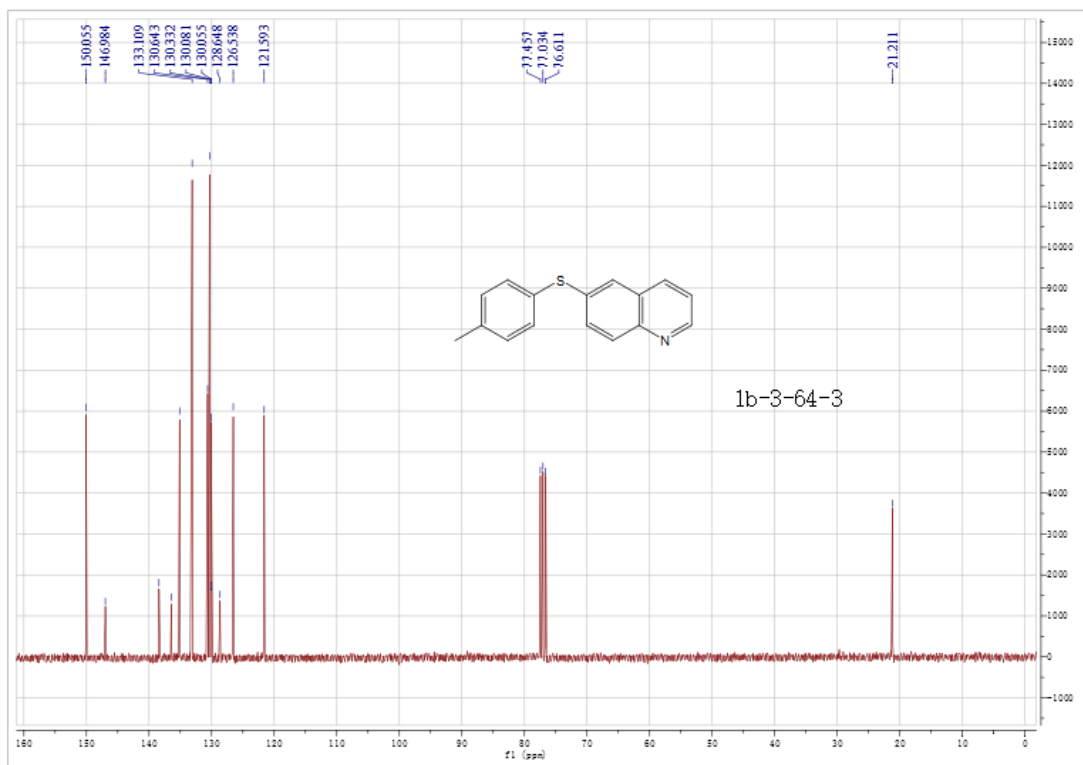

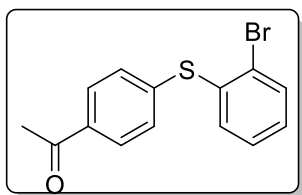

1-(4-((2-Bromophenyl)thio)phenyl)ethan-1-one (6),  $^1\text{H}$  NMR (300 MHz,  $\text{CDCl}_3$ )

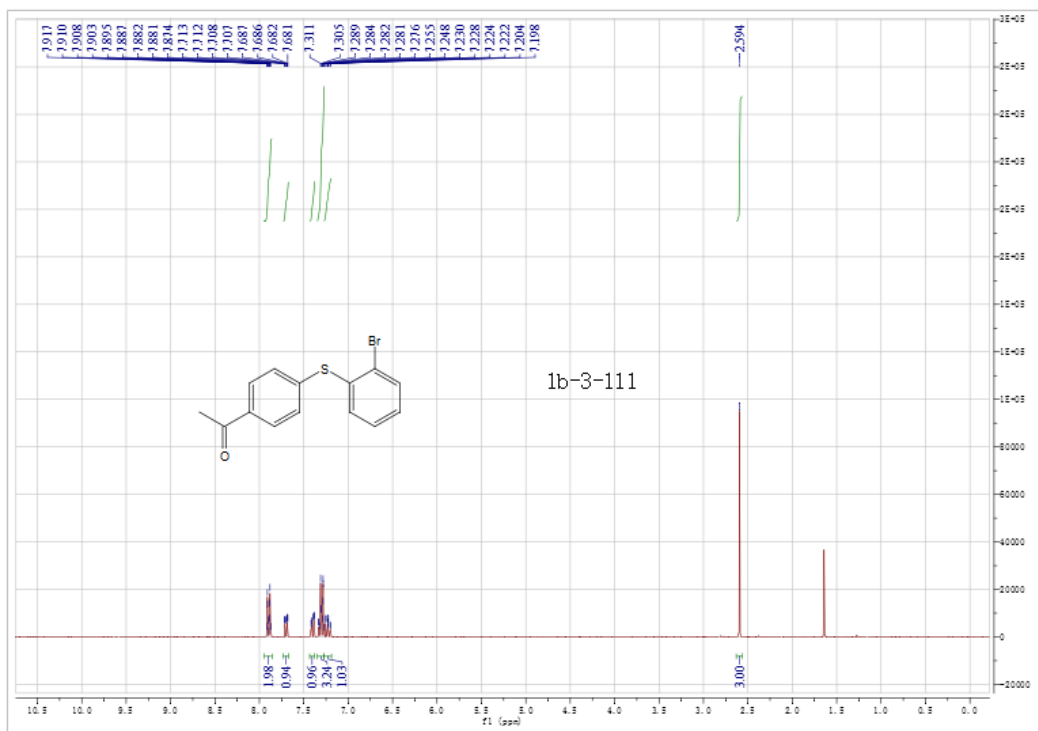

$^{13}\text{C}$  NMR (75 MHz,  $\text{CDCl}_3$ )

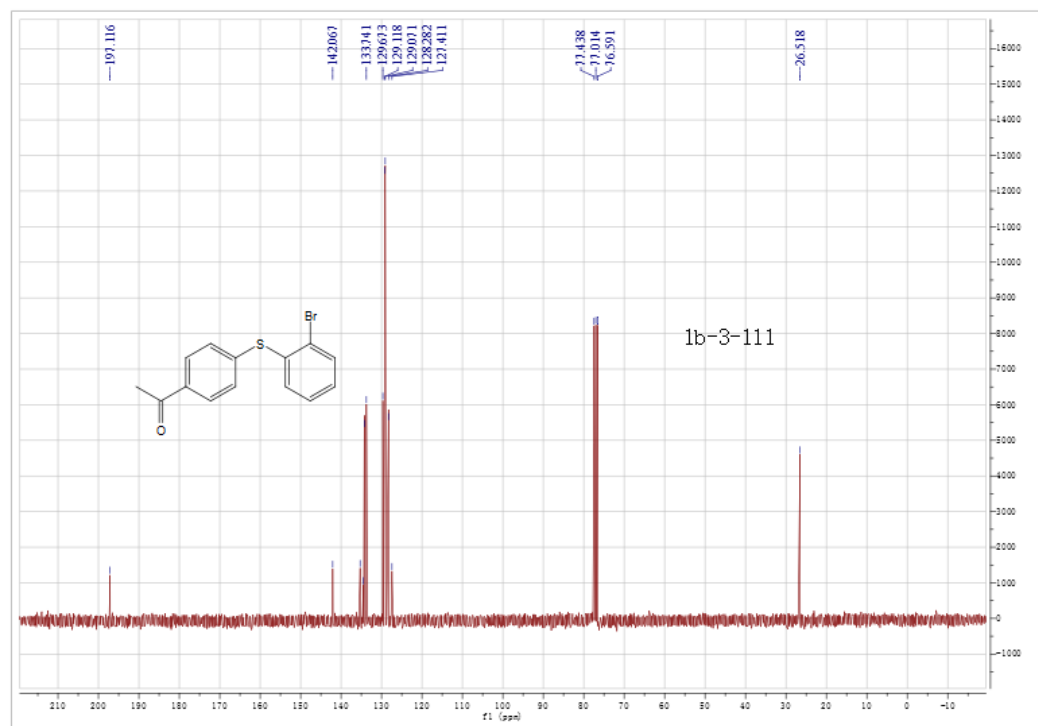

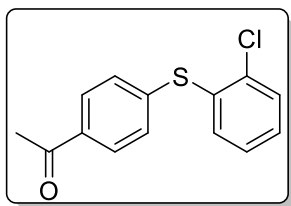

1-(4-((2-Chlorophenyl)thio)phenyl)ethan-1-one (7),  $^1\text{H}$  NMR (300 MHz,  $\text{CDCl}_3$ )

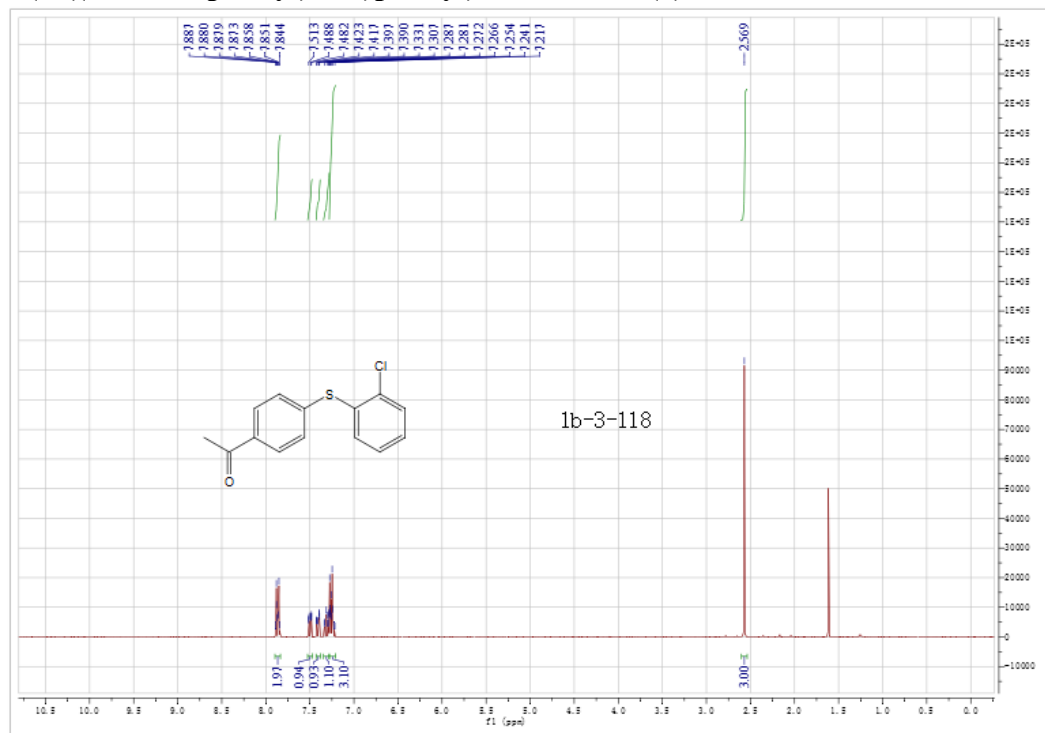

$^{13}\text{C}$  NMR (75 MHz,  $\text{CDCl}_3$ )

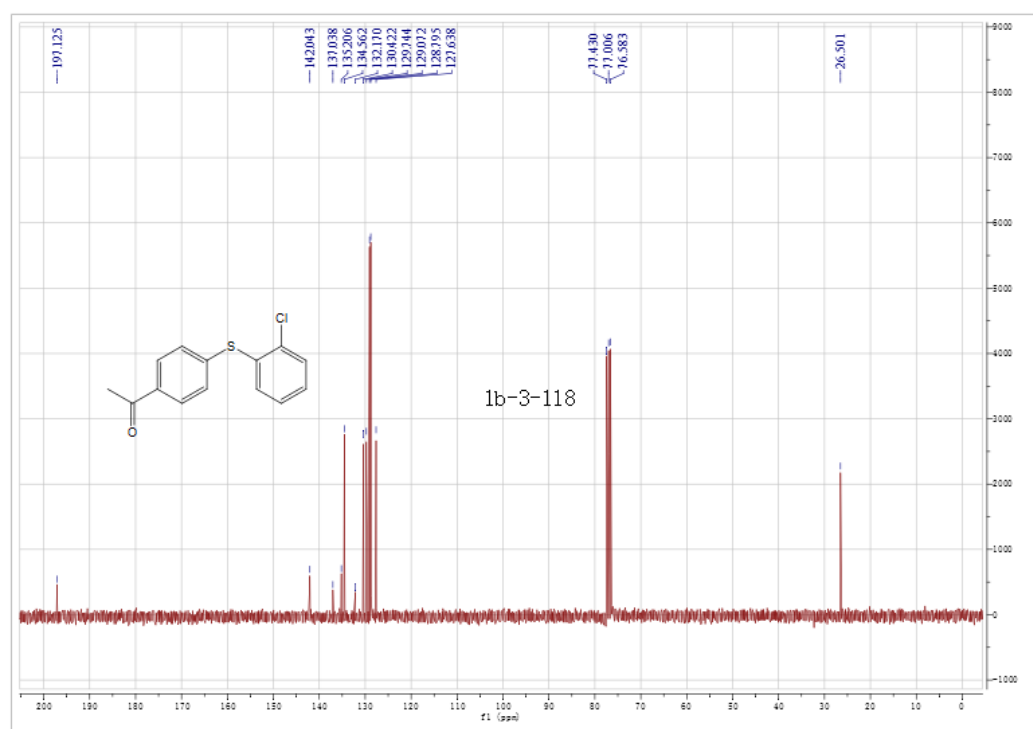

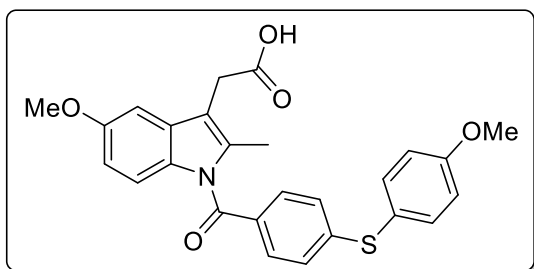

**2-(5-Methoxy-1-(4-((4-methoxyphenyl)thio)benzoyl)-2-methyl-1H-indol-3-yl)acetic acid (8),  $^1\text{H}$  NMR (300 MHz,  $\text{CDCl}_3$ )**

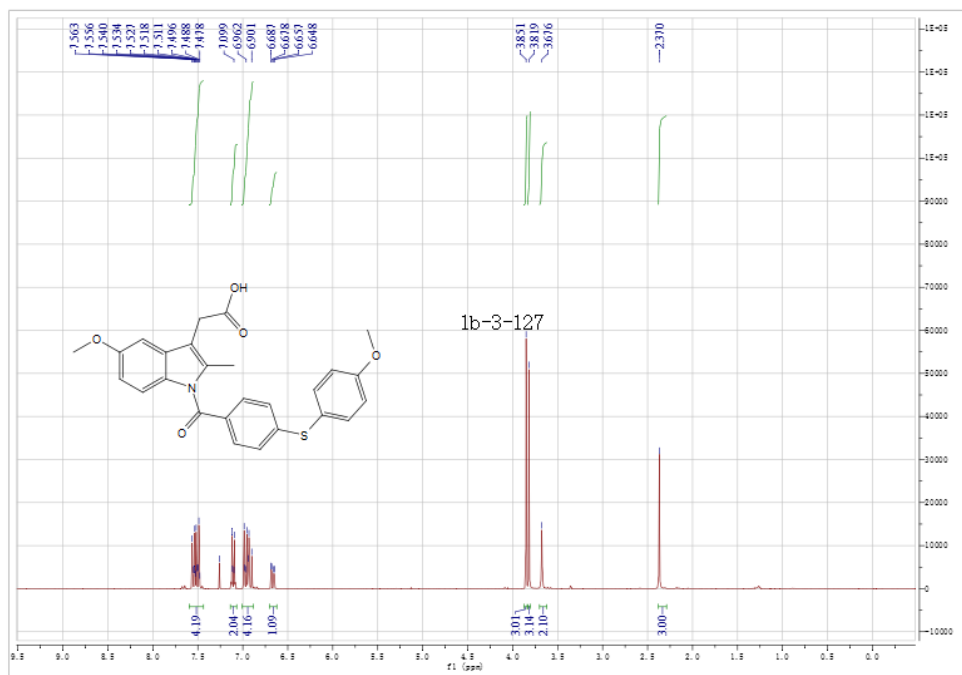

**$^{13}\text{C}$  NMR (75 MHz,  $\text{CDCl}_3$ )**

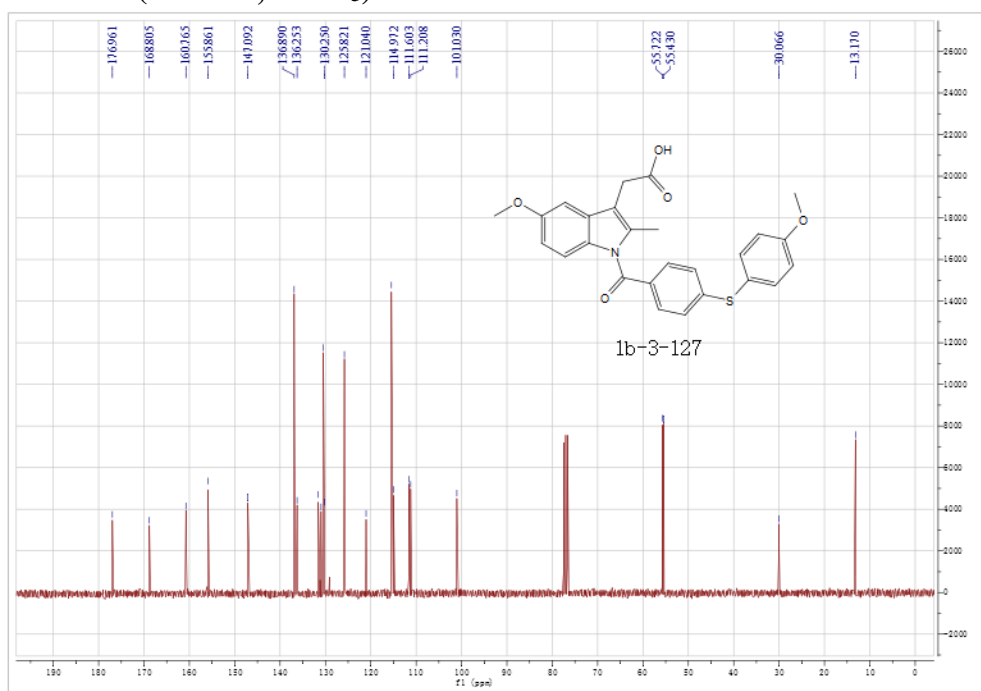

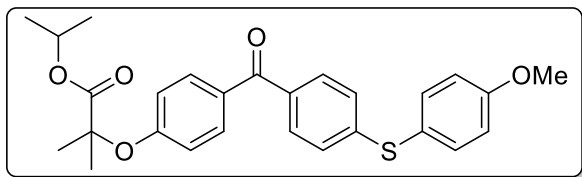

**Isopropyl 2-(4-(4-((4-methoxyphenyl)thio)benzoyl)phenoxy)-2-methylpropanoate (9),  $^1\text{H}$  NMR (300 MHz,  $\text{CDCl}_3$ )**

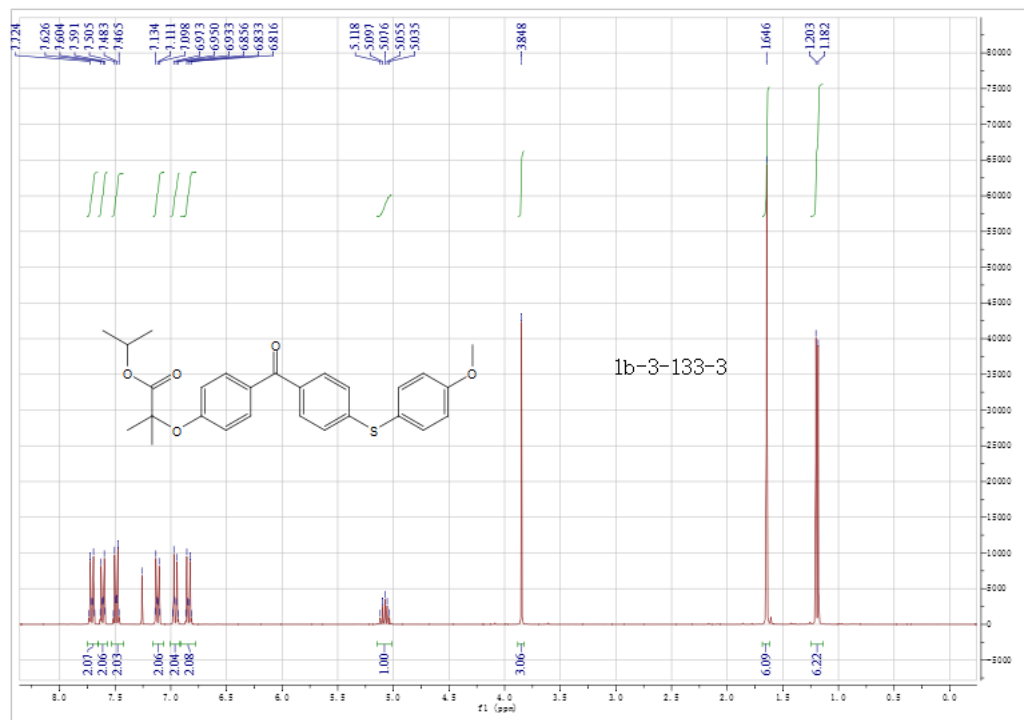

**$^{13}\text{C}$  NMR (75 MHz,  $\text{CDCl}_3$ )**

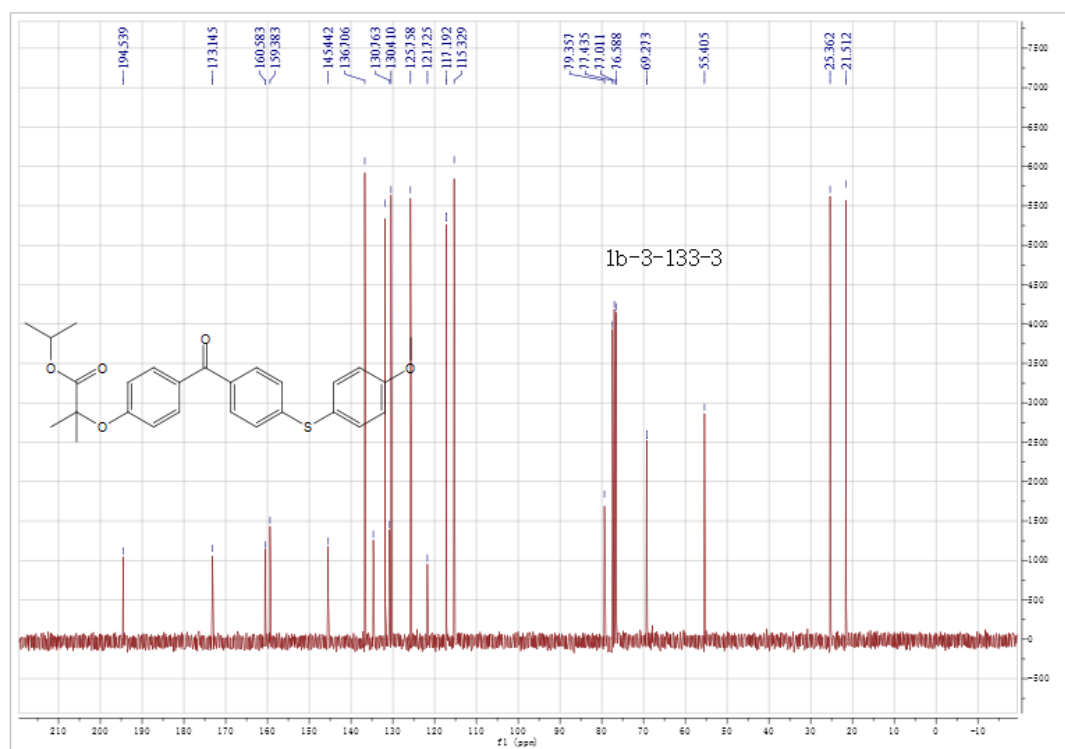



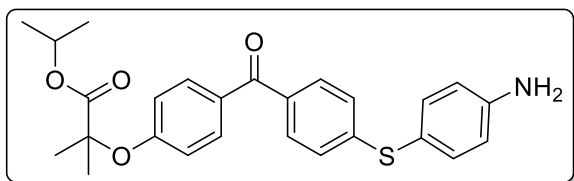

**Isopropyl 2-(4-(4-((4-aminophenyl)thio)benzoyl)phenoxy)-2-methylpropanoate (10),  $^1\text{H}$  NMR (300 MHz,  $\text{CDCl}_3$ )**

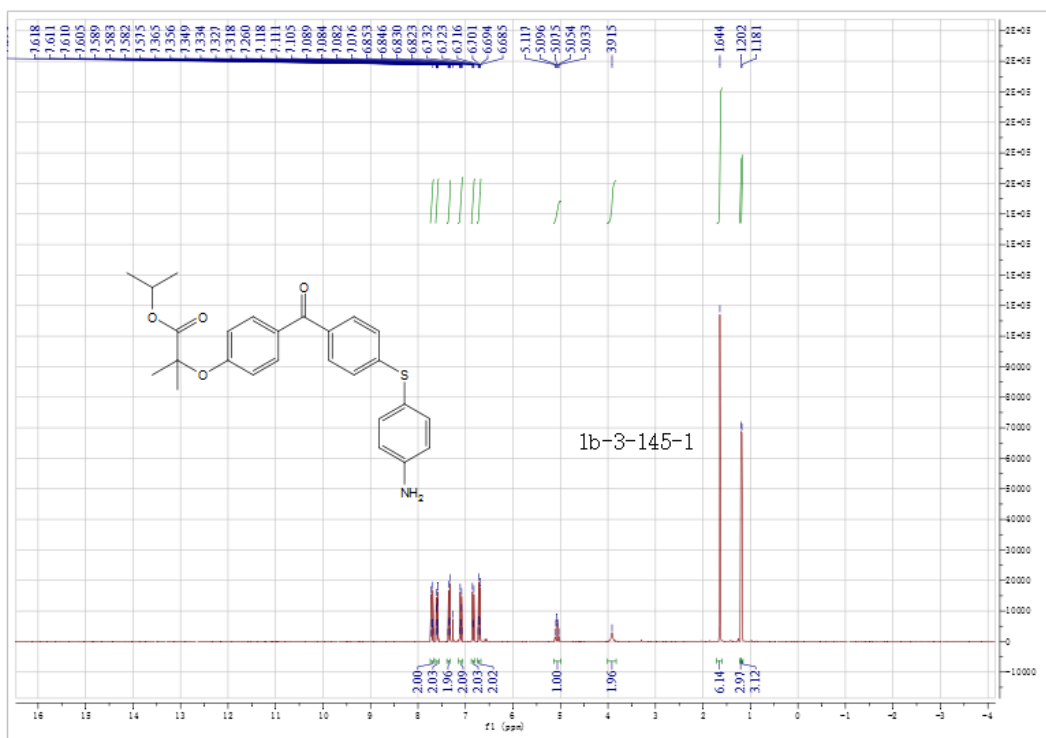

**$^{13}\text{C}$  NMR (75 MHz,  $\text{CDCl}_3$ )**

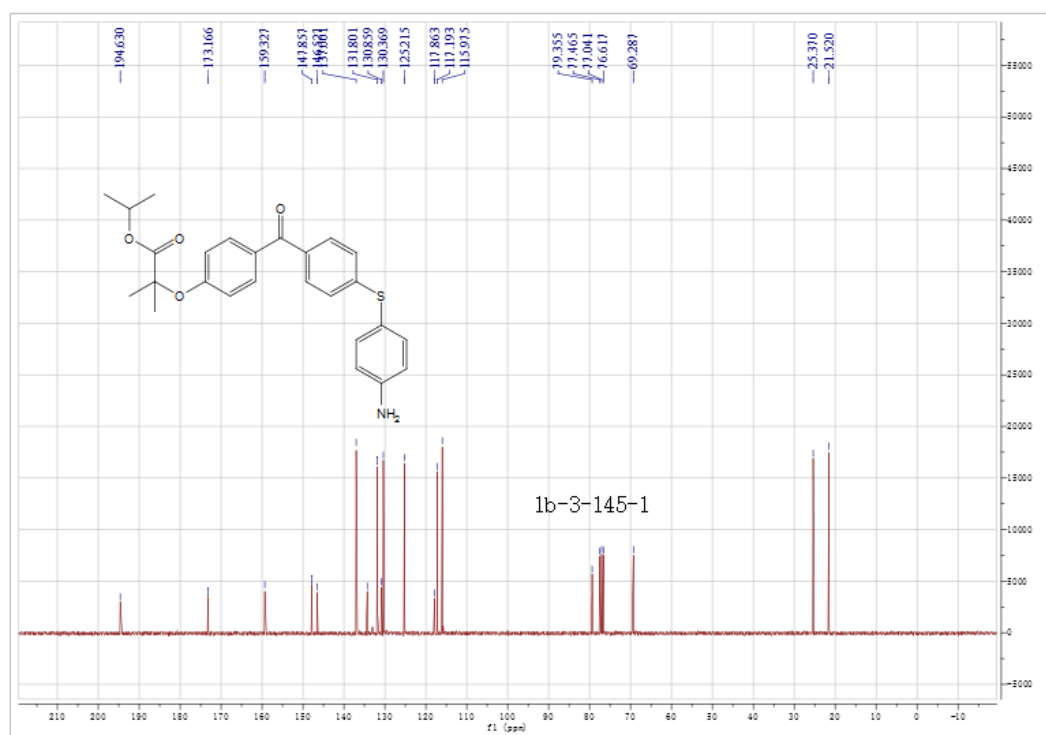

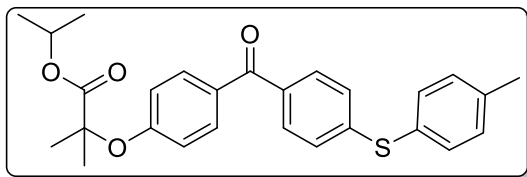

Isopropyl 2-methyl-2-(4-(4-(p-tolylthio)benzoyl)phenoxy)propanoate (11),  $^1\text{H}$  NMR (300 MHz,  $\text{CDCl}_3$ )

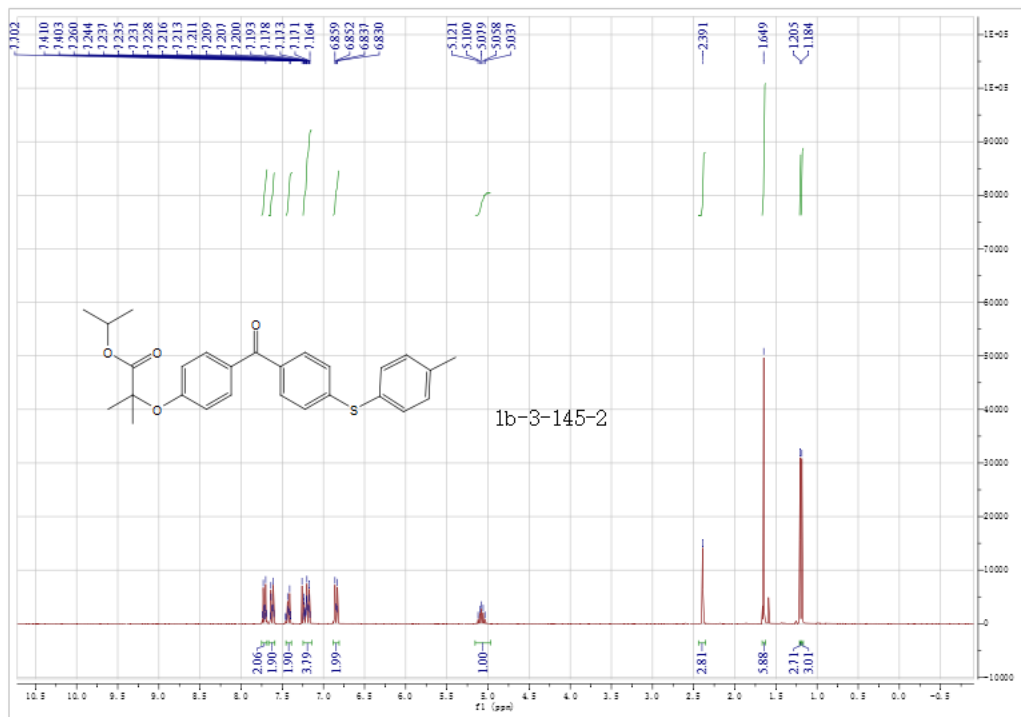

$^{13}\text{C}$  NMR (75 MHz,  $\text{CDCl}_3$ )

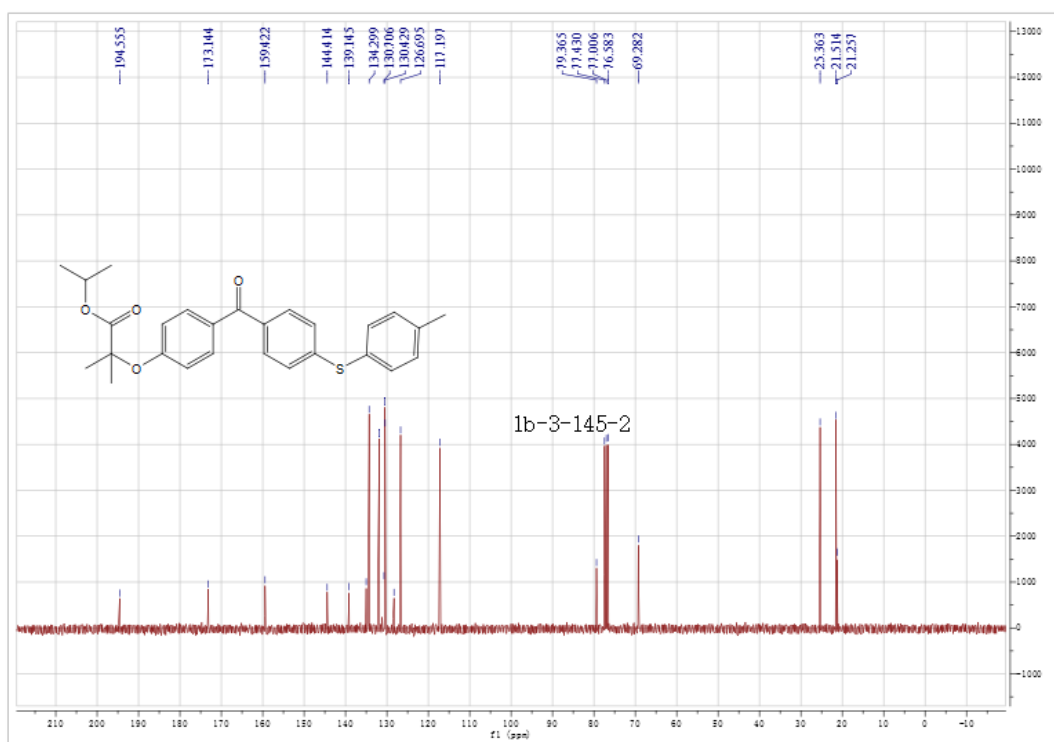

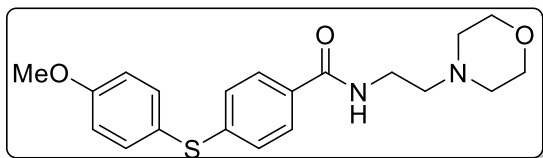

4-((4-Methoxyphenyl)thio)-N-(2-morpholinoethyl)benzamide (12),  $^1\text{H}$  NMR (300 MHz,  $\text{CDCl}_3$ )

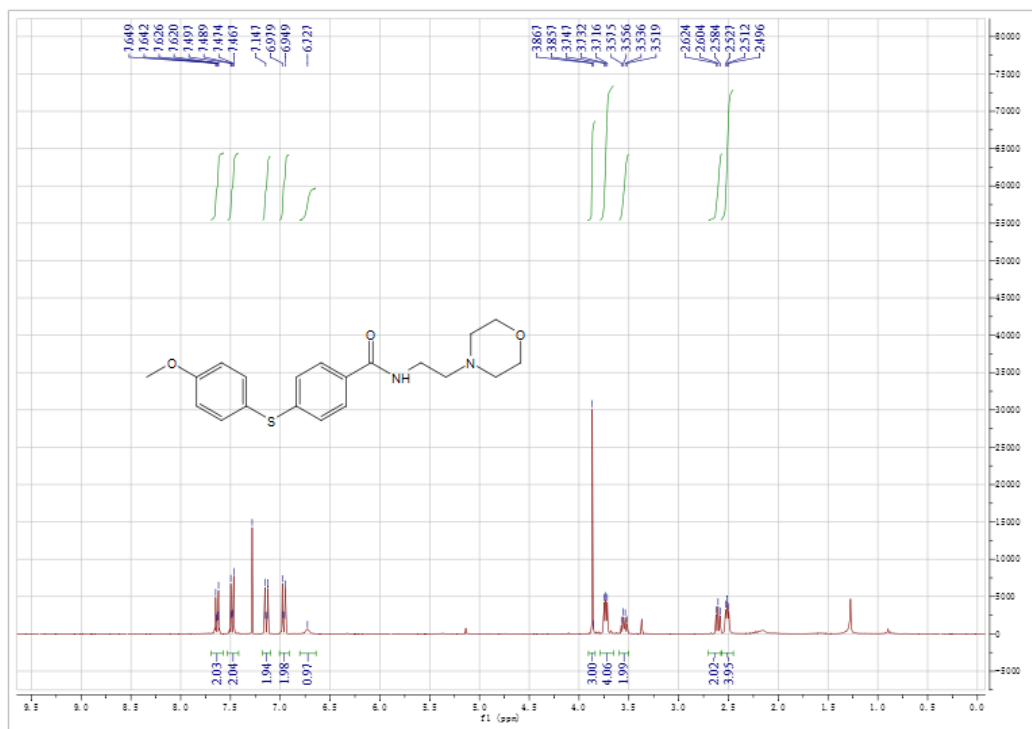

$^{13}\text{C}$  NMR (75 MHz,  $\text{CDCl}_3$ )

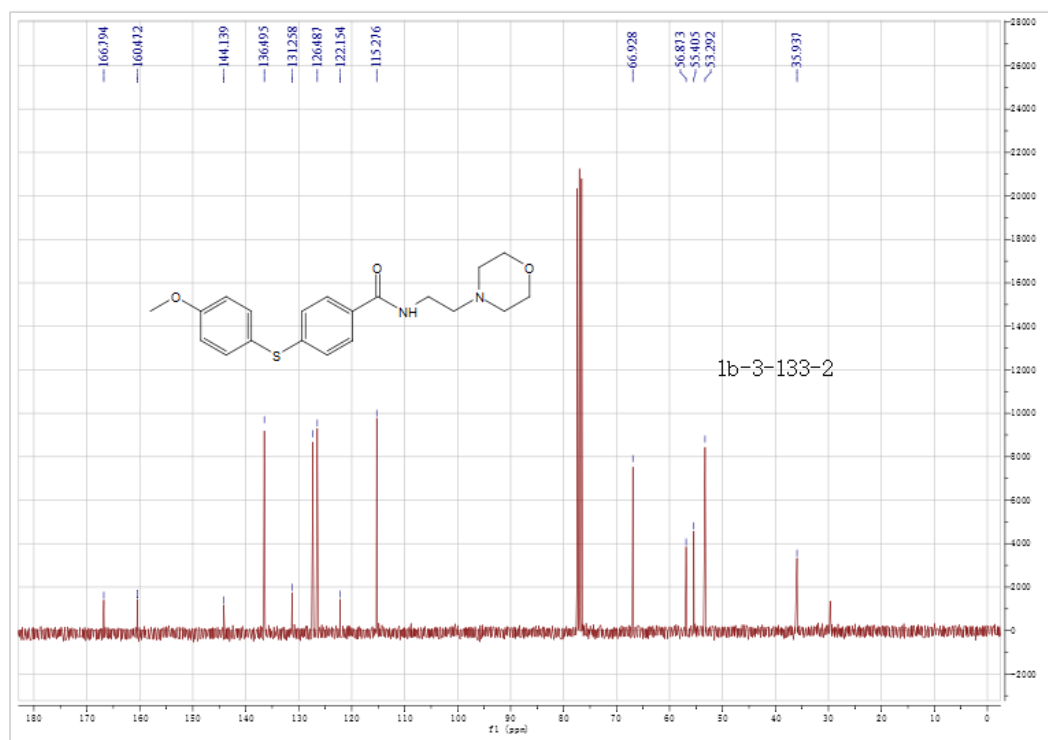

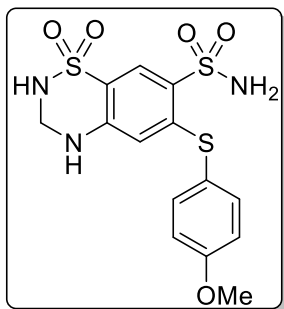

**6-((4-Methoxyphenyl)thio)-3,4-dihydro-2H-benzo[e][1,2,4]thiadiazine-7-sulfonamide 1,1-dioxide (13)  $^1\text{H}$  NMR (300 MHz,  $d_6$ -DMSO)**

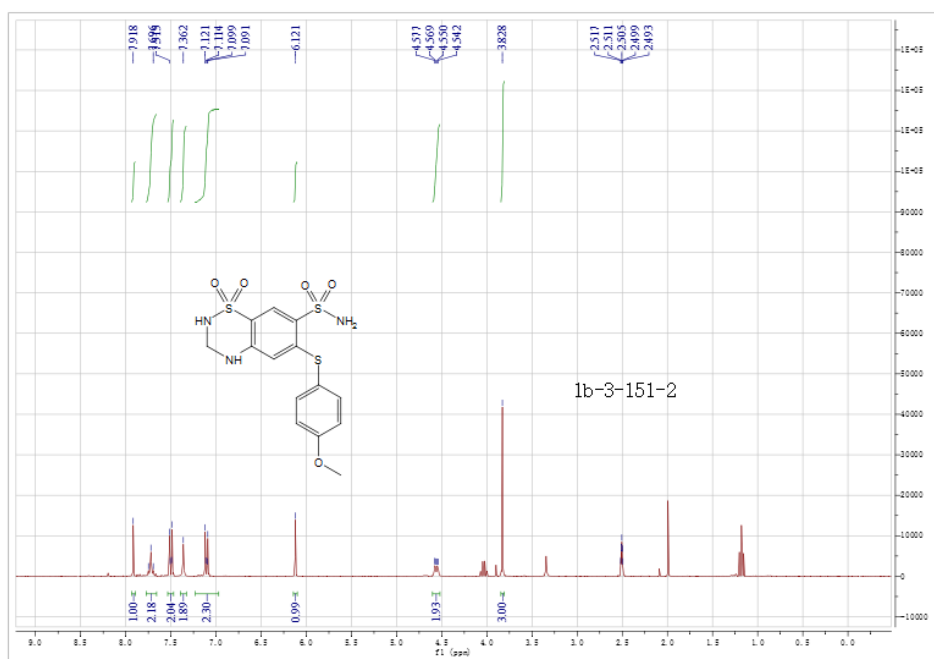

**$^{13}\text{C}$  NMR (75 MHz,  $d_6$ -DMSO)**

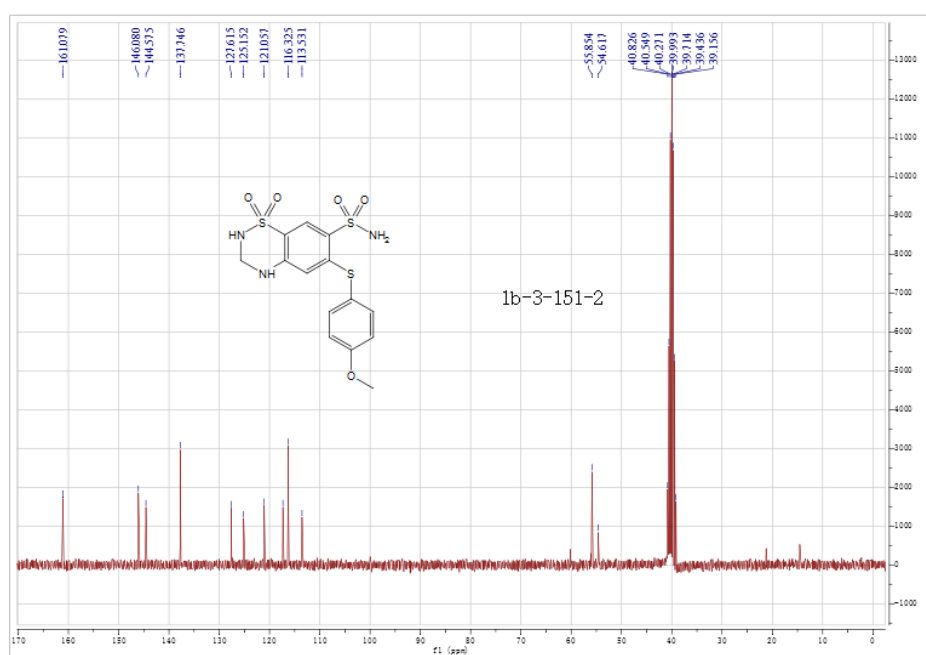

Supplement: NIHMS959911-supplement-SI.pdf [file NIHMS959911-supplement-SI.pdf]
